# Supplementary material for: Clinical outcomes and potential therapies prediction of subgroups based on a ferroptosis-related long non-coding RNA signature for gastric cancer
Source: Aging (Albany NY). 2022 Aug 14;14(15):6358–76. doi: 10.18632/aging.204227 (PMC9417219; doi:10.18632/aging.204227)
Supplement: Supplementary Tables 1-3 [file aging-14-204227-s001.xlsx]

## Sheet: Supplementary Table 1
Supplementary Table 1. 259 ferroptosis-related genes obtained from the FerrDb database.
Driver
Symbol	Name	HGNC_ID	Evidence	Test method	Test in	Test setting	Pathway	Confidence	Caution	Protein encoded	UniProtKB	PMID	Remark
RPL8	Ribosomal protein L8	HGNC:10368	Required in erastin-induced ferroptosis. Silencing of it conferred against erastin-induced ferroptosis.	shRNA screening, qPCR, gene silencing	Human	NRAS mutant HT-1080 fibrosarcoma cells; KRAS mutant Calu-1 non small cell lung cancer cell	RPL8 :+: Ferroptosis	Validated	_NA_	60S ribosomal protein L8	P62917 (RL8_HUMAN)	22632970	_NA_
IREB2	Iron response element binding protein 2	HGNC:6115	Required in erastin-induced ferroptosis. Silencing of it conferred against erastin-induced ferroptosis.	shRNA screening, qPCR, gene silencing	Human	NRAS mutant HT-1080 fibrosarcoma cells; KRAS mutant Calu-1 non small cell lung cancer cell	IREB2 :+: Ferroptosis	Validated	_NA_	Iron-responsive element-binding protein 2	P48200 (IREB2_HUMAN)	22632970	_NA_
ATP5MC3	ATP synthase membrane subunit c locus 3	HGNC:843	Required in erastin-induced ferroptosis. Silencing of it conferred against erastin-induced ferroptosis.	shRNA screening, qPCR, gene silencing	Human	NRAS mutant HT-1080 fibrosarcoma cells; KRAS mutant Calu-1 non small cell lung cancer cell	ATP5MC3 :+: Ferroptosis	Validated	_NA_	ATP synthase F(0) complex subunit C3	P48201 (AT5G3_HUMAN)	22632970	ATP5G3 in article
CS	Citrate synthase	HGNC:2422	Required in erastin-induced ferroptosis. Silencing of it conferred against erastin-induced ferroptosis.	shRNA screening, qPCR, gene silencing	Human	NRAS mutant HT-1080 fibrosarcoma cells; KRAS mutant Calu-1 non small cell lung cancer cell	CS :+: Ferroptosis	Validated	_NA_	Citrate synthase	O75390 (CISY_HUMAN)	22632970	_NA_
EMC2	ER membrane protein complex subunit 2	HGNC:28963	Required in erastin-induced ferroptosis. Silencing of it conferred against erastin-induced ferroptosis.	shRNA screening, qPCR, gene silencing	Human	NRAS mutant HT-1080 fibrosarcoma cells; KRAS mutant Calu-1 non small cell lung cancer cell	EMC2 :+: Ferroptosis	Validated	_NA_	ER membrane protein complex subunit 2	Q15006 (EMC2_HUMAN)	22632970	TTC35 in article
ACSF2	Acyl-CoA synthetase family member 2	HGNC:26101	Required in erastin-induced ferroptosis. Silencing of it conferred against erastin-induced ferroptosis.	shRNA screening, qPCR, gene silencing	Human	NRAS mutant HT-1080 fibrosarcoma cells; KRAS mutant Calu-1 non small cell lung cancer cell	ACSF2 :+: Ferroptosis	Validated	_NA_	Medium-chain acyl-CoA ligase ACSF2	Q96CM8 (ACSF2_HUMAN)	22632970	_NA_
NOX1	Nicotinamide adenine dinucleotide phosphate (NADPH) oxidase (NOX) 1	HGNC:7889	Suppresses erastin-induced ferroptosis when inhibited by inhibitor.	Inhibition test by diphenylene iodonium (DPI) and GKT137831.	Human	KRAS mutant Calu-1 non small cell lung cancer cell	NOX1 :+: Ferroptosis	Deduced	The presented inhibition study is not sufficient to confirm its role in ferroptosis.	NADPH oxidase 1	Q9Y5S8 (NOX1_HUMAN)	22632970	_NA_
CYBB	Cytochrome b-245 beta chain	HGNC:2578	Suppresses erastin-induced ferroptosis when inhibited by inhibitor.	Inhibition test by diphenylene iodonium (DPI).	Human	KRAS mutant Calu-1 non small cell lung cancer cell	CYBB :+: Ferroptosis	Deduced	The presented inhibition study is not sufficient to confirm its role in ferroptosis.	Cytochrome b-245 heavy chain	P04839 (CY24B_HUMAN)	22632970	NOX2 in article
NOX3	Nicotinamide adenine dinucleotide phosphate (NADPH) oxidase (NOX) 3	HGNC:7890	Suppresses erastin-induced ferroptosis when inhibited by inhibitor.	Inhibition test by diphenylene iodonium (DPI).	Human	KRAS mutant Calu-1 non small cell lung cancer cell	NOX3 :+: Ferroptosis	Deduced	The presented inhibition study is not sufficient to confirm its role in ferroptosis.	NADPH oxidase 3	Q9HBY0 (NOX3_HUMAN)	22632970	_NA_
NOX4	Nicotinamide adenine dinucleotide phosphate (NADPH) oxidase (NOX) 4	HGNC:7891	Suppresses erastin-induced ferroptosis when inhibited by inhibitor.	Inhibition test by diphenylene iodonium (DPI) and GKT137831.	Human	KRAS mutant Calu-1 non small cell lung cancer cell	NOX4 :+: Ferroptosis	Deduced	The presented inhibition study is not sufficient to confirm its role in ferroptosis.	NADPH oxidase 4	Q9NPH5 (NOX4_HUMAN)	22632970	_NA_
NOX5	Nicotinamide adenine dinucleotide phosphate (NADPH) oxidase (NOX) 5	HGNC:14874	Suppresses erastin-induced ferroptosis when inhibited by inhibitor.	Inhibition test by diphenylene iodonium (DPI).	Human	KRAS mutant Calu-1 non small cell lung cancer cell	NOX5 :+: Ferroptosis	Deduced	The presented inhibition study is not sufficient to confirm its role in ferroptosis.	NADPH oxidase 5	Q96PH1 (NOX5_HUMAN)	22632970	_NA_
DUOX1	Dual oxidase 1	HGNC:3062	Suppresses erastin-induced ferroptosis when inhibited by inhibitor.	Inhibition test by diphenylene iodonium (DPI).	Human	KRAS mutant Calu-1 non small cell lung cancer cell	DUOX1 :+: Ferroptosis	Deduced	The presented inhibition study is not sufficient to confirm its role in ferroptosis.	Dual oxidase 1	Q9NRD9 (DUOX1_HUMAN)	22632970	_NA_
DUOX2	Dual oxidase 2	HGNC:13273	Suppresses erastin-induced ferroptosis when inhibited by inhibitor.	Inhibition test by diphenylene iodonium (DPI).	Human	KRAS mutant Calu-1 non small cell lung cancer cell	DUOX2 :+: Ferroptosis	Deduced	The presented inhibition study is not sufficient to confirm its role in ferroptosis.	Dual oxidase 2	Q9NRD8 (DUOX2_HUMAN)	22632970	_NA_
G6PD	Glucose-6-phosphate dehydrogenase	HGNC:4057	Required in erastin-induced ferroptosis.	shRNA silencing, RT-qPCR	Human	KRAS mutant Calu-1 non small cell lung cancer cell	G6PD :+: Ferroptosis	Validated	_NA_	Glucose-6-phosphate 1-dehydrogenase	P11413 (G6PD_HUMAN)	22632970	_NA_
PGD	Phosphoglycerate dehydrogenase	HGNC:8891	Required in erastin-induced ferroptosis.	shRNA silencing, RT-qPCR	Human	KRAS mutant Calu-1 non small cell lung cancer cell	PGD :+: Ferroptosis	Validated	_NA_	6-phosphogluconate dehydrogenase	P52209 (6PGD_HUMAN)	22632970	_NA_
VDAC2	Valtage-dependent anion channels 2	HGNC:12672	Required in erastin-induced ferroptosis.	shRNA silencing, RT-qPCR	Human	KRAS mutant Calu-1 non small cell lung cancer cell	VDAC2 :+: Ferroptosis	Validated	_NA_	Voltage-dependent anion-selective channel protein 2	P45880 (VDAC2_HUMAN)	22632970	_NA_
PIK3CA	Phosphatidylinositol-4,5-bisphosphate 3-kinase catalytic subunit alpha	HGNC:8975	Inhibitor blocked ferroptotic cell death.	Cell survival assays	Mice	HT22 cells	PIK3CA :-: GSH, GSH :-: Lipid ROS, Lipid ROS :+: Ferroptosis	Validated	Also involved in necrosis and apoptosis.	Phosphatidylinositol 4	P42336 (PK3CA_HUMAN)	24739485	PI3Kalpha in article
FLT3	Fms related tyrosine kinase 3	HGNC:3765	Inhibitor blocked ferroptotic cell death.	Cell survival assays	Mice	HT22 cells	FLT3 :+: Lipid ROS, Lipid ROS :+: Ferroptosis	Validated	Also involved in necrosis and apoptosis.	Receptor-type tyrosine-protein kinase FLT3	P36888 (FLT3_HUMAN)	24739485	_NA_
SCP2	Sterol carrier protein 2	HGNC:10606	SCP-2 inhibitors showed anti-ferroptotic activity, which was substantiated by knocking down SCP-2 in Gpx4−/− cells.	Cell viability test, siRNA-mediated knockdown.	Mice	PZL cells	SCP2 :+: Ferroptosis	Validated	Transient effect. Other translocases may work in parallel.	Non-specific lipid-transfer protein	P22307 (NLTP_HUMAN)	25402683	_NA_
TP53	Tumor protein p53	HGNC:11998	Inhibits cystine uptake and sensitizes cells to ferroptosis. Erastin induced high levels of cell death in p53+/+ MEFs.	Cell death kinetics, shRNA, western blotting, RT-PCR, ChIP assay, cystine uptake assay	Human, mice	H1299, U2OS and MCF7 cells, mouse embryonic fibroblasts	TP53 :-: SLC7A11, SLC7A11 :+: Cystine, Cystine :-: Ferroptosis	Validated	The acetylation-defective mutant (p53[3KR]) also retains the ability to induce ferroptosis upon reactive oxygen species (ROS)-induced stress.	Cellular tumor antigen p53	P04637 (P53_HUMAN)	25799988	_NA_
ACSL4	Acyl-CoA synthetase long chain family member 4	HGNC:3571	Deletion of this gene likely suppress ferroptosis by limiting the membrane-resident pool of oxidation-sensitive fatty acids.	Retroviral-mediated insertional mutagenesis and sequencing	Human	Chronic myeloid leukemia cell line KBM7	ACSL4 :+: Ferroptosis	Predicted	Author prediction based on gene function.	Long-chain-fatty-acid--CoA ligase 4	O60488 (ACSL4_HUMAN)	25965523	_NA_
LPCAT3	Lysophosphatidylcholine acyltransferase 3	HGNC:30244	Deletion of this gene likely suppress ferroptosis by limiting the membrane-resident pool of oxidation-sensitive fatty acids.	Retroviral-mediated insertional mutagenesis and sequencing	Human	Chronic myeloid leukemia cell line KBM7	LPCAT3 :+: Ferroptosis	Predicted	Author prediction based on gene function.	Lysophospholipid acyltransferase 5	Q6P1A2 (MBOA5_HUMAN)	25965523	_NA_
NRAS	NRAS proto-oncogene, GTPase	HGNC:7989	NRAS12V mutant protects RMS13 cells from ferroptotic cell death.	Cell viability assessed by MTT assay, western blot	Human	RMS13 cells	NRAS :+: Ferroptosis	Deduced	Inferred as a promoter because RAS mutant is resistant to ferroptosis.	GTPase NRas	P01111 (RASN_HUMAN)	26157704	_NA_
KRAS	KRAS proto-oncogene, GTPase	HGNC:6407	KRAS12V mutant protects RMS13 cells from ferroptotic cell death.	Cell viability assessed by MTT assay, western blot	Human	RMS13 cells	KRAS :+: Ferroptosis	Deduced	Inferred as a promoter because RAS mutant is resistant to ferroptosis.	GTPase KRas	P01116 (RASK_HUMAN)	26157704	_NA_
HRAS	HRas proto-oncogene, GTPase	HGNC:5173	HRAS12V mutant protects RMS13 cells from ferroptotic cell death.	Cell viability assessed by MTT assay, western blot	Human	RMS13 cells	HRAS :+: Ferroptosis	Deduced	Inferred as a promoter because RAS mutant is resistant to ferroptosis.	GTPase HRas	P01112 (RASH_HUMAN)	26157704	_NA_
TF	Transferrin	HGNC:11740	Essential for the induction of ferroptotic cell death. Transferrin can only interact with transferrin receptor and be transported into the cell when it is loaded with iron.	Killing activity	Mice	Mouse embryonic fibroblasts	TF :+: Ferroptosis	Validated	_NA_	Serotransferrin	P02787 (TRFE_HUMAN)	26166707	Transferrin in article
TFRC	Transferrin receptor	HGNC:11763	RNAi of transferrin receptor (TfR) inhibited ferroptosis.	RNAi	Mice	Mouse embryonic fibroblasts	TFRC :+: Ferroptosis	Validated	_NA_	Transferrin receptor protein 1	P02786 (TFR1_HUMAN)	26166707	Tfr in article
TFR2	Transferrin receptor 2	HGNC:11762	RNAi of transferrin receptor (TfR) inhibited ferroptosis.	RNAi	Mice	Mouse embryonic fibroblasts	TFR2 :+: Ferroptosis	Validated	_NA_	Transferrin receptor protein 2	Q9UP52 (TFR2_HUMAN)	26166707	Tfr in article
SLC38A1	Solute carrier family 38 member 1	HGNC:13447	RNAi knockdown markedly blocked ferroptosis.	RNAi knockdown, cell survival analysis	Mice	Mouse embryonic fibroblasts	SLC38A1 :+: Glutamine, Glutamine :+: Glutamate, Glutamate :+: alpha-Ketoglutarate, alpha-Ketoglutarate :+: Ferroptosis	Validated	_NA_	Sodium-coupled neutral amino acid transporter 1	Q9H2H9 (S38A1_HUMAN)	26166707	_NA_
SLC1A5	Solute carrier family 1 member 5	HGNC:10943	Pharmacological inhibition by L-g-glutamyl-p-nitroanilide or RNAi knockdown markedly blocked ferroptosis.	RNAi knockdown, cell survival analysis	Mice	Mouse embryonic fibroblasts	SLC1A5 :+: Glutamine, Glutamine :+: Glutamate, Glutamate :+: alpha-Ketoglutarate, alpha-Ketoglutarate :+: Ferroptosis	Validated	_NA_	Neutral amino acid transporter B(0)	Q15758 (AAAT_HUMAN)	26166707	_NA_
GLS2	Glutaminase 2	HGNC:29570	Both inhibitor inhibition and gene knockdown inhibit ferroptotic cell death.	shRNA, western blot, cell viability	Mice	Mouse embryonic fibroblasts	GSL2 :+: Glutamate, Glutamate :+: Ferroptosis	Validated	_NA_	Glutaminase liver isoform	Q9UI32 (GLSL_HUMAN)	26166707	_NA_
GOT1	Glutamic-oxaloacetic transaminase 1	HGNC:4432	RNAi reduced ferroptosis.	shRNA, qPCR, cell viability	Mice	Mouse embryonic fibroblasts	GOT1 :+: alpha-Ketoglutarate, alpha-Ketoglutarate :+: Ferroptosis	Validated	_NA_	Aspartate aminotransferase	P17174 (AATC_HUMAN)	26166707	_NA_
CARS1	Cysteinyl-tRNA synthetase 1	HGNC:1493	Required for ferroptosis in diverse cell contexts. Knockdown of CARS inhibited erastin-induced death by preventing the induction of lipid reactive oxygen species, without altering iron homeostasis.	siRNA screen, shRNA, western blot, cell viability	Human, rat	HT-1080 fibrosarcoma cells,BJeLR fibroblast cells, Panc1 cells, A673 (Ewing’s sarcoma) and 143B (osteosarcoma) cells, PC12 cells	CARS1 :-: Transsulfuration pathway, Transsulfuration pathway :-: Ferroptosis	Validated	_NA_	Cysteine--tRNA ligase	P49589 (SYCC_HUMAN)	26184909	CARS in article
ALOX5	Arachidonate 5-lipoxygenase	HGNC:435	The 5-Lipoxygenase inhibitor zileuton protected HT22 neuronal cells from erastin-induced ferroptosis.	Cell Viability Assay, ROS measurement	Mice	HT22 mouse neuronal cell line	ALOX5 :+: Lipid ROS, Lipid ROS :+: Ferroptosis	Validated	_NA_	Arachidonate 5-lipoxygenase	P09917 (LOX5_HUMAN)	26235588	5-LOX in article
KEAP1	Kelch like ECH associated protein 1	HGNC:23177	Knockdown of Keap1 reversed loss of p62-increased degradation of NRF2 in ferroptosis. Keap1 knockdown led to resistance to erastin-induced and sorafenib-induced growth inhibition with decreased ferroptotic events in the absence or presence of p62 knockdown.	Western blot, shRNA knockdown, cell viability	Human, mice	HepG2, Hepa1‐6, Hep3B, and SNU‐182 cells	KEAP1 :-: NFE2L2, NFE2L2 :-: Ferroptosis	Validated	_NA_	Kelch-like ECH-associated protein 1	Q14145 (KEAP1_HUMAN)	26403645	_NA_
HMOX1	Heme oxygenase 1	HGNC:5013	Zinc protoporphyrin IX, a HO-1 inhibitor, prevented Erastin-triggered ferroptotic cancer cell death. Overexpression accelerates erastin-induced cell death.	Cell viability assay, qRT-PCR, western blot	Human, mice	HT-1080 fibrosarcoma cells, mice lung fibroblastic cells	HMOX1 :+: Lipid ROS, Lipid ROS :+: Ferroptosis	Validated	Other articles (PMID 26403645, 28515173) suggest it a suppressor.	Heme oxygenase 1	P09601 (HMOX1_HUMAN)	26405158	HO-1 in article
ATG5	Autophagy related 5	HGNC:589	Knockout or knockdown limited erastin-induced ferroptosis.	shRNA	Human, mice	Mouse embryonic fibroblasts, human pancreatic cancer cell lines (PANC1 and PANC2.03), and the human fibrosarcoma cell line HT-1080	ATG5 :+: Ferroptosis	Validated	_NA_	Autophagy protein 5	Q9H1Y0 (ATG5_HUMAN)	27245739	_NA_
ATG7	Autophagy related 7	HGNC:16935	Knockout or knockdown limited erastin-induced ferroptosis.	shRNA	Human, mice	Mouse embryonic fibroblasts, human pancreatic cancer cell lines (PANC1 and PANC2.03), and the human fibrosarcoma cell line HT-1081	ATG7 :+: Ferroptosis	Validated	_NA_	Ubiquitin-like modifier-activating enzyme ATG7	O95352 (ATG7_HUMAN)	27245739	_NA_
NCOA4	Nuclear receptor coactivator 4	HGNC:7671	Inhibition suppressed ferroptosis, and overexpression promoted ferroptosis.	shRNA, gene transfection	Human	PANC1 or HT-1080 cells	NCOA4 :-: FTH1, FTH1 :-: Ferroptosis	Validated	_NA_	Nuclear receptor coactivator 4	Q13772 (NCOA4_HUMAN)	27245739	_NA_
ALOX12	Arachidonate 12-lipoxygenase, 12S type	HGNC:429	Silencing ALOX genes made cells resistant to ferroptosis.	qPCR	Human	G-401 cells	ALOX12 :+: PUFAs peroxidation, PUFAs peroxidation :+: Ferroptosis	Validated	_NA_	Arachidonate 12-lipoxygenase	P18054 (LOX12_HUMAN)	27506793	_NA_
ALOX12B	Arachidonate 12-lipoxygenase, 12R type	HGNC:430	Silencing ALOX genes made cells resistant to ferroptosis.	qPCR	Human	G-401 cells	ALOX12B :+: PUFAs peroxidation, PUFAs peroxidation :+: Ferroptosis	Validated	_NA_	Arachidonate 12-lipoxygenase	O75342 (LX12B_HUMAN)	27506793	_NA_
ALOX15	Arachidonate 15-lipoxygenase	HGNC:433	Silencing ALOX genes made cells resistant to ferroptosis.	qPCR	Human	G-401 cells	ALOX15 :+: PUFAs peroxidation, PUFAs peroxidation :+: Ferroptosis	Validated	_NA_	Arachidonate 15-lipoxygenase	P16050 (LOX15_HUMAN)	27506793	_NA_
ALOX15B	Arachidonate 15-lipoxygenase type B	HGNC:434	Silencing ALOX genes made cells resistant to ferroptosis. Erastin-induced cell death was rescued by silencing either ALOX15B or ALOXE3, which supported the hypothesis that lipoxygenases are required for ferroptosis.	qPCR, siRNA	Human	G-401, BJeLR and HT-1080 cells	ALOX15B :+: PUFAs peroxidation, PUFAs peroxidation :+: Ferroptosis	Validated	_NA_	Arachidonate 15-lipoxygenase B	O15296 (LX15B_HUMAN)	27506793	_NA_
ALOXE3	Arachidonate lipoxygenase 3	HGNC:13743	Silencing ALOX genes made cells resistant to ferroptosis. Erastin-induced cell death was rescued by silencing either ALOX15B or ALOXE3, which supported the hypothesis that lipoxygenases are required for ferroptosis.	qPCR, siRNA	Human	G-401, BJeLR and HT-1080 cells	ALOXE3 :+: PUFAs peroxidation, PUFAs peroxidation :+: Ferroptosis	Validated	_NA_	Hydroperoxide isomerase ALOXE3	Q9BYJ1 (LOXE3_HUMAN)	27506793	_NA_
PHKG2	Phosphorylase kinase catalytic subunit gamma 2	HGNC:8931	U-2-OS cells became resistant to erastin upon PHKG2 silencing. Erastin-treated HT-1080 cells were rescued by shPHKG2.	shRNA suppressor screen, qPCR, cellular iron staining, cell viability	Human	U-2-OS, HT-1080 cells	PHKG2 :+: PUFAs peroxidation, PUFAs peroxidation :+: Ferroptosis	Validated	_NA_	Phosphorylase b kinase gamma catalytic chain	P15735 (PHKG2_HUMAN)	27506793	_NA_
ACO1	Aconitase 1	HGNC:117	The gene targets of the enriched shRNAs are potential genes that positively regulate ferroptosis.	RNAi screening	Mice	Mouse embryonic fibroblasts	ACO1 :+: Lipid ROS, Lipid ROS :+: Ferroptosis	Screened	_NA_	Cytoplasmic aconitate hydratase	P21399 (ACOC_HUMAN)	27514700	_NA_
G6PDX	_NA_	_NA_	The gene targets of the enriched shRNAs are potential genes that positively regulate ferroptosis.	RNAi screening	Mice	Mouse embryonic fibroblasts	G6PDX :+: Lipid ROS, Lipid ROS :+: Ferroptosis	Screened	_NA_	_NA_	_NA_	27514700	Not found in HGNC
ULK1	Unc-51 like autophagy activating kinase 1	HGNC:12558	Potential positive regulators of ferroptosis. Knockout of ULK1 led to significantly lower levels of erastin-induced ferroptosis in a dose- and time-dependent manner.	RNAi screening, gene knockout	Mice	Mouse embryonic fibroblasts	ULK1 :+: Lipid ROS, Lipid ROS :+: Ferroptosis	Validated	_NA_	Serine/threonine-protein kinase ULK1	O75385 (ULK1_HUMAN)	27514700	_NA_
ATG3	Autophagy related 3	HGNC:20962	Potential positive regulators of ferroptosis. Knockout of ATG3 greatly reduced the sensitivity of MEFs to ferropotosis, and reconstituting ATG3 back to these cells restored the ferroptosis sensitivity.	RNAi screening, gene knockout	Mice	Mouse embryonic fibroblasts	ATG3 :+: Lipid ROS, Lipid ROS :+: Ferroptosis	Validated	_NA_	Ubiquitin-like-conjugating enzyme ATG3	Q9NT62 (ATG3_HUMAN)	27514700	_NA_
ATG4D	Autophagy related 4D cysteine peptidase	HGNC:20789	Potential positive regulators of ferroptosis.	RNAi screening	Mice	Mouse embryonic fibroblasts	ATG4D :+: Lipid ROS, Lipid ROS :+: Ferroptosis	Screened	_NA_	Cysteine protease ATG4D	Q86TL0 (ATG4D_HUMAN)	27514700	_NA_
BECN1	Beclin 1	HGNC:1034	Potential positive regulators of ferroptosis.	RNAi screening	Mice	Mouse embryonic fibroblasts	BECN1 :+: Lipid ROS, Lipid ROS :+: Ferroptosis	Screened	_NA_	Beclin-1	Q14457 (BECN1_HUMAN)	27514700	_NA_
MAP1LC3A	Microtubule associated protein 1 light chain 3 alpha	HGNC:6838	Potential positive regulators of ferroptosis.	RNAi screening	Mice	Mouse embryonic fibroblasts	MAP1LC3A :+: Lipid ROS, Lipid ROS :+: Ferroptosis	Screened	_NA_	Microtubule-associated proteins 1A/1B light chain 3A	Q9H492 (MLP3A_HUMAN)	27514700	_NA_
GABARAPL2	GABA type A receptor associated protein like 2	HGNC:13291	Potential positive regulators of ferroptosis.	RNAi screening	Mice	Mouse embryonic fibroblasts	GABARAPL2 :+: Lipid ROS, Lipid ROS :+: Ferroptosis	Screened	_NA_	Gamma-aminobutyric acid receptor-associated protein-like 2	P60520 (GBRL2_HUMAN)	27514700	_NA_
GABARAPL1	GABA type A receptor associated protein like 1	HGNC:4068	Potential positive regulators of ferroptosis.	RNAi screening	Mice	Mouse embryonic fibroblasts	GABARAPL1 :+: Lipid ROS, Lipid ROS :+: Ferroptosis	Screened	_NA_	Gamma-aminobutyric acid receptor-associated protein-like 1	Q9H0R8 (GBRL1_HUMAN)	27514700	_NA_
ATG16L1	Autophagy related 16 like 1	HGNC:21498	Potential positive regulators of ferroptosis.	RNAi screening	Mice	Mouse embryonic fibroblasts	ATG16L1 :+: Lipid ROS, Lipid ROS :+: Ferroptosis	Screened	_NA_	Autophagy-related protein 16-1	Q676U5 (A16L1_HUMAN)	27514700	_NA_
WIPI1	WD repeat domain, phosphoinositide interacting 1	HGNC:25471	Potential positive regulators of ferroptosis.	RNAi screening	Mice	Mouse embryonic fibroblasts	WIPI1 :+: Lipid ROS, Lipid ROS :+: Ferroptosis	Screened	_NA_	WD repeat domain phosphoinositide-interacting protein 1	Q5MNZ9 (WIPI1_HUMAN)	27514700	_NA_
WIPI2	WD repeat domain, phosphoinositide interacting 2	HGNC:32225	Potential positive regulators of ferroptosis.	RNAi screening	Mice	Mouse embryonic fibroblasts	WIPI2 :+: Lipid ROS, Lipid ROS :+: Ferroptosis	Screened	_NA_	WD repeat domain phosphoinositide-interacting protein 2	Q9Y4P8 (WIPI2_HUMAN)	27514700	_NA_
SNX4	Sorting nexin 4	HGNC:11175	Potential positive regulators of ferroptosis.	RNAi screening	Mice	Mouse embryonic fibroblasts	SNX4 :+: Lipid ROS, Lipid ROS :+: Ferroptosis	Screened	_NA_	Sorting nexin-4	O95219 (SNX4_HUMAN)	27514700	_NA_
ATG13	Autophagy related 13	HGNC:29091	Knockout of ATG13 greatly reduced the sensitivity of MEFs to ferropotosis, and reconstituting ATG13 back to these cells restored the ferroptosis sensitivity.	Gene knockout	Mice	Mouse embryonic fibroblasts	ATG13 :+: Lipid ROS, Lipid ROS :+: Ferroptosis	Validated	_NA_	Autophagy-related protein 13	O75143 (ATG13_HUMAN)	27514700	_NA_
ULK2	Unc-51 like autophagy activating kinase 2	HGNC:13480	Knockout of ULK2 led to significantly lower levels of erastin-induced ferroptosis in a dose- and time-dependent manner.	Gene knockout	Mice	Mouse embryonic fibroblasts	ULK2 :+: Lipid ROS, Lipid ROS :+: Ferroptosis	Validated	_NA_	Serine/threonine-protein kinase ULK2	Q8IYT8 (ULK2_HUMAN)	27514700	_NA_
SAT1	Spermidine/spermine N1-acetyltransferase 1	HGNC:10540	p53-mediated activation of SAT1 contributes to ferroptotic cell death in the presence of ROS stress. Knockdown of Sat1 partially rescued ROS-induced ferroptosis.	qRT-PCR, siRNA, CRISPR-cas9, western blot	Human, mice	H1299, U2OS cells, mouse embryonic fibroblasts, mouse xenograft	SAT1 :+: ALOX15, ALOX15 :+: Lipid ROS, Lipid ROS :+: Ferroptosis	Validated	Activated by p53.	Diamine acetyltransferase 1	P21673 (SAT1_HUMAN)	27698118	_NA_
EGFR	Epidermal growth factor receptor	HGNC:3236	Cell death in activated EGFR mutant cells occurs by ferroptosis. Inhibiting EGFR and MAPK signaling rescued cell viability following cystine withdrawal.	Fluorescence-activated cell sorting (FACS) analysis, cell viability	Human	Human mammary epithelial) cells	EGFR :+: MAPK, MAPK :+: Ferroptosis	Validated	_NA_	Epidermal growth factor receptor	P00533 (EGFR_HUMAN)	28297659	_NA_
MAPK3	Mitogen-activated protein kinase 3	HGNC:6877	Inhibiting EGFR and MAPK signaling rescued cell viability following cystine withdrawal.	Immunoblots, lucifer yellow infiltration, cell viability, fluorescence-activated cell sorting (FACS) analysis	Human	Human mammary epithelial) cells	MAPK :-: GPX4, GPX4 :-: Lipid ROS, MAPK :+: NOX4, NOX4 :+: H2O2, H2O2 :+: Lipid ROS, Lipid ROS :+: Ferroptosis	Validated	_NA_	Mitogen-activated protein kinase 3	P27361 (MK03_HUMAN)	28297659	ERK1 in article
MAPK1	Mitogen-activated protein kinase 1	HGNC:6871	Inhibiting EGFR and MAPK signaling rescued cell viability following cystine withdrawal.	Immunoblots, lucifer yellow infiltration, cell viability, fluorescence-activated cell sorting (FACS) analysis	Human	Human mammary epithelial) cells	MAPK :-: GPX4, GPX4 :-: Lipid ROS, MAPK :+: NOX4, NOX4 :+: H2O2, H2O2 :+: Lipid ROS, Lipid ROS :+: Ferroptosis	Validated	_NA_	Mitogen-activated protein kinase 1	P28482 (MK01_HUMAN)	28297659	ERK2 in article
BID	BH3 interacting domain death agonist	HGNC:1050	BID deletion prevents erastin- and glutamate-induced cell death. BID inhibition inhibited erastin-induced ferroptosis.	Cell viability, western blot, CRISPR/Cas9, gene transfection	Mice	HT-22 cells, mouse embryonic fibroblasts	BID :+: Ferroptosis	Validated	_NA_	BH3-interacting domain death agonist	P55957 (BID_HUMAN)	28384611	_NA_
ZEB1	Zinc finger E-box binding homeobox 1	HGNC:11642	Knockout of ZEB1 prevents cell death induced by GPX4 inhibition.	sgRNA, cell viability	Human	KP4 pancreatic cancer cells	ZEB1 :+: Lipid ROS, Lipid ROS :+: Ferroptosis	Validated	_NA_	Zinc finger E-box-binding homeobox 1	P37275 (ZEB1_HUMAN)	28678785	_NA_
DPP4	Dipeptidyl peptidase 4	HGNC:3009	Required for ferroptosis in TP53-deficient CRC cells.	Cell death, RNAi, western blot, enzyme activity	Human, mice	TP53-/- HCT116 cells, athymic nude mice	DPP4 :+: Lipid ROS, Lipid ROS :+: Ferroptosis	Validated	_NA_	Dipeptidyl peptidase 4	P27487 (DPP4_HUMAN)	28813679	_NA_
CDKN2A	Cyclin dependent kinase inhibitor 2A	HGNC:1787	Combination of ARF induction and ROS treatment induced ferroptotic cell death. Knockdown of endogenous ARF protected cells from ROS-induced cell death.	RNAi, immunoblot, phase-contrast image, cell death quantification	Human, mice	H1299, SaoS2, U2OS cells, mouse embryonic fibroblasts	CDKN2A :-: NFE2L2, NFE2L2 :+: SLC7A11, SLC7A11 :-: Ferroptosis, CDKN2A :+: p53, p53 :-: SLC7A11, SLC7A11 :-: Ferroptosis	Validated	_NA_	Cyclin-dependent kinase inhibitor 2A	P42771 (CDN2A_HUMAN)	28985506	ARF in article
PEBP1	Phosphatidylethanolamine binding protein 1	HGNC:8630	Elevated levels of PEBP1 resulted in increased sensitivity of HK2 cells to RSL3 whereas lowered contents of PEBP1 in HAEC and HT22 cells were associated with decreased sensitivity to ferroptosis.	Western blot, siRNA, cell death assay	Human, mice	HK2, HAEC and HT22 cells	(PEBP1/15LO) :+: Ferroptosis	Validated	_NA_	Phosphatidylethanolamine-binding protein 1	P30086 (PEBP1_HUMAN)	29053969	_NA_
SOCS1	Suppressor of cytokine signaling 1	HGNC:19383	Expression of SOCS1 sensitized cells to ferroptosis inducer. This effect of SOCS1 was efficiently blocked by ferroptosis inhibitor. Expression of SOCS1 reduced the levels of GSH, explaining in part its ability to sensitize cells to ferroptosis.	Cell death assay, cell viability assay, qPCR	Human	U2OS or IMR90 cells	SOCS1 :+: p53, p53 :-: SLC7A11, SLC7A11 :+: GSH, GSH :-: Ferroptosis	Validated	_NA_	Suppressor of cytokine signaling 1	O15524 (SOCS1_HUMAN)	29081404	_NA_
CDO1	Cysteine dioxygenase type 1	HGNC:1795	CDO1 suppression contributes to ferroptosis resistance.	siRNA, western blot, MTT assay	Human	Gastric cancer cells AGS, BGC823, athymic nude mice	CDO1 :-: GPX4, GPX4 :-: Ferroptosis	Validated	_NA_	Cysteine dioxygenase type 1	Q16878 (CDO1_HUMAN)	29144989	_NA_
MYB	MYB proto-oncogene, transcription factor	HGNC:7545	Erastin-induced ferroptosis was restrained when c-Myb was suppressed.	Western blot, siRNA, qRT-PCR, MTT assay	Human	Gastric cancer cells AGS, BGC823, MKN45, SGC7901, and MGC803	MYB :+: CDO1, CDO1 :-: GPX4, GPX4 :-: Ferroptosis	Validated	_NA_	Transcriptional activator Myb	P10242 (MYB_HUMAN)	29144989	C-Myb in article
MAPK8	Mitogen-activated protein kinase 8	HGNC:6881	JNK1/2 inhibitors inhibited t-BHP-induced ferroptosis. t-BHP treatment significantly increased the protein expression of p-JNK.	MitoSOX probe, luminometer kit, C11-BODIPY probe, western blot	Rat	PC12 cells	MAPK8 :+: Lipid ROS, Lipid ROS :+: Ferroptosis	Validated	_NA_	Mitogen-activated protein kinase 8	P45983 (MK08_HUMAN)	29330409	JNK1 in article
MAPK9	Mitogen-activated protein kinase 9	HGNC:6886	JNK1/2 inhibitors inhibited t-BHP-induced ferroptosis. t-BHP treatment significantly increased the protein expression of p-JNK.	MitoSOX probe, luminometer kit, C11-BODIPY probe, western blot	Rat	PC12 cells	MAPK9 :+: Lipid ROS, Lipid ROS :+: Ferroptosis	Validated	_NA_	Mitogen-activated protein kinase 9	P45984 (MK09_HUMAN)	29330409	JNK2 in article
CHAC1	ChaC glutathione specific gamma-glutamylcyclotransferase 1	HGNC:28680	CHAC1 degradation of GSH might enhance cystine-starvation-induced cell death.	Western blot, real-time PCR, cell viability assay, siRNA, GSH assay kit	Human	MDA-MB-231, Hs 578T, and HCC 1937 cells	CHAC1 :-: GSH, GSH :-: Ferroptosis	Validated	_NA_	Glutathione-specific gamma-glutamylcyclotransferase 1	Q9BUX1 (CHAC1_HUMAN)	29383104	_NA_
MAPK14	Mitogen-activated protein kinase 14	HGNC:6876	Ferroptosis was blocked by inhibiting p38 MAPK activation.	Cell viability assay, lipid ROS measurement, RT-qPCR, western blot	Mice	TM4 Sertoli cells	MAPK14 :+: Ferroptosis	Validated	_NA_	Mitogen-activated protein kinase 14	Q16539 (MK14_HUMAN)	29436589	p38 MAPK in article
LINC00472	Long intergenic non-protein coding RNA 472	HGNC:21380	Increases erastin-induced growth inhibition, whereas depletion of P53RRA decreased erastin-induced growth inhibition.	Bisulfite sequencing, RNA pull-down, mass spectrometry, RNA immunoprecipitation, qRT-PCR, cell viability assay	Human	Lung cancer A549, SPCA1, and H522 cells	LINC00472 :+: p53, p53 :+: Ferroptosis	Validated	Also triggers apoptosis.	Putative uncharacterized protein encoded by LINC00472	Q9H8W2 (CF155_HUMAN)	29588351	P53RRA in article
PRKAA2	Protein kinase AMP-activated catalytic subunit alpha 2	HGNC:9377	Inhibition of PRKAA/AMPKalpha diminishes ferroptosis.	siRNA, western blot, cell viability assay, GSH assay, lipid peroxidation assay, iron assay	Human	HCT116 and CX-1 cells	PRKAA2 :+: (BECN1/SLC7A11), (BECN1/SLC7A11) :+: Ferroptosis	Validated	_NA_	5'-AMP-activated protein kinase catalytic subunit alpha-2	P54646 (AAPK2_HUMAN)	30057310	PRKAA in article
PRKAA1	Protein kinase AMP-activated catalytic subunit alpha 1	HGNC:9376	Inhibition of PRKAA/AMPKalpha diminishes ferroptosis.	siRNA, western blot, cell viability assay, GSH assay, lipid peroxidation assay, iron assay	Human	HCT116 and CX-1 cells	PRKAA1 :+: (BECN1/SLC7A11), (BECN1/SLC7A11) :+: Ferroptosis	Validated	_NA_	5'-AMP-activated protein kinase catalytic subunit alpha-1	Q13131 (AAPK1_HUMAN)	30057310	AMPK alpha in article
ELAVL1	ELAV like RNA binding protein 1	HGNC:3312	ELAVL1 siRNA led to ferroptosis resistance, whereas ELAVL1 plasmid contributed to classical ferroptotic events.	Immunohistochemistry, hydroxyproline assay, immunofluorescence, cell viability assay, western blot, qPCR, iron assay, ROS assay, RNAi	Human, mice	Human liver specimens and hepatic stellate cell; C57BL/6 mice; mouse hepatocyte and hepatic stellate cell; HSC-LX2 and HSC-T6 cells	ELAVL1 :+: Ferroptosis	Validated	_NA_	ELAV-like protein 1	Q15717 (ELAV1_HUMAN)	30081711	_NA_
BAP1	BRCA1 associated protein 1	HGNC:950	Suppresses SLC7A11-mediated cystine uptake and promotes ferroptosis. BAP1 mutants lose their abilities to repress SLC7A11 and to promote ferroptosis.	Flow cytometry, cell viability assay, cell death assay, western blot, gene knockout, lipid peroxidation assay, cystine uptake assay, GSH assay, RT-PCR, ChIP-qPCR, luciferase reporter assay, immunoprecipitation, IHC, ChIP-seq	Human	HEK-293T, Caki1, 786-O, 769-P, ACHN and NCI-H226 cell lines; RCC4, UMRC2, SLR20, and UMRC6 cell lines; TK10 cell line; athymic nude mice	BAP1 :-: SLC7A11, SLC7A11 :-: Lipid ROS, Lipid ROS :+: Ferroptosis	Validated	_NA_	Ubiquitin carboxyl-terminal hydrolase BAP1	Q92560 (BAP1_HUMAN)	30202049	_NA_
ABCC1	ATP binding cassette subfamily C member 1	HGNC:51	Accelerates ferroptosis. Disruption of MRP1 inhibited ferroptosis potently.	Western blot, GSH assay, dead cell counts, gene transfection, CRISPR/Cas9, cell viability assay, RT-qPCR	Human	HAP1, H1299, U-2 OS cells	ABCC1 :-: GSH, GSH :-: Ferroptosis	Validated	_NA_	Multidrug resistance-associated protein 1	P33527 (MRP1_HUMAN)	30726737	MRP1 in article
MIR6852	microRNA 6852	HGNC:49993	Promotes ferroptosis. Binds to LINC0033 and serves as a negative upstream regulator of CBS-mediated ferroptosis inhibition.	qRT-PCR, gene knockdown, luciferase assay, gene overexpression, MTT assay, colony-formation assay	Human	A549 and SPC-A-1 cells	MIR6852 :-: CBS, CBS :-: Ferroptosis	Validated	_NA_	_NA_	_NA_	30787392	_NA_
ACVR1B	Activin A receptor type 1B	HGNC:172	Inhibition attenuated erastin-induced ferroptosis.	Western blot, siRNA, glutathione assay, RT-PCR, cell viability assay	Human	HK-2 cells	ACVR1B :-: NFE2L2, NFE2L2 :-: Ferroptosis	Validated	_NA_	Activin receptor type-1B	P36896 (ACV1B_HUMAN)	30804470	ALK4 in article
TGFBR1	Transforming growth factor beta receptor 1	HGNC:11772	Inhibition attenuated erastin-induced ferroptosis.	Western blot, siRNA, glutathione assay, RT-PCR, cell viability assay	Human	HK-2 cells	TGFBR1 :-: NFE2L2, NFE2L2 :-: Ferroptosis	Validated	_NA_	TGF-beta receptor type-1	P36897 (TGFR1_HUMAN)	30804470	ALK5 in article
EPAS1	Endothelial PAS domain protein 1	HGNC:3374	A driver of ferroptosis susceptibility. Ablation reduced susceptibility to ferroptosis.	CRISPR, sgRNA, shRNA, immunoblot, cell viability, western blot	Mice	786-O cells	EPAS1 :+: HILPDA, EPAS1 :+: PLIN2, HILPDA :+: PUFA, PLIN2 :+: PUFA, PUFA :+: PUFA-phospholipid hydroperoxides, PUFA-phospholipid hydroperoxides :+: Ferroptosis	Validated	_NA_	Endothelial PAS domain-containing protein 1	Q99814 (EPAS1_HUMAN)	30962421	HIF-2alpha in article
HILPDA	Hypoxia inducible lipid droplet associated	HGNC:28859	Promotes ferroptosis sensitivity downstream of HIF-2alpha.	RNA-Seq, western blot, qRT-PCR, shRNA, cell viability, immunoblot	Mice	786-O cells	HILPDA :+: PUFA, PUFA :+: PUFA-phospholipid hydroperoxides, PUFA-phospholipid hydroperoxides :+: Ferroptosis	Validated	_NA_	Hypoxia-inducible lipid droplet-associated protein	Q9Y5L2 (HLPDA_HUMAN)	30962421	_NA_
HIF1A	Hypoxia inducible factor 1 subunit alpha	HGNC:4910	Re-sensitized HIF-2alpha-null cells to ferroptosis. Induce ferroptosis sensitivity in cancer cells.	cDNA screenin, cell viability	Mice	786-O cells	HIF1A :+: HILPDA, HIF1A :+: PLIN2, HILPDA :+: PUFA, PLIN2 :+: PUFA, PUFA :+: PUFA-phospholipid hydroperoxides, PUFA-phospholipid hydroperoxides :+: Ferroptosis	Validated	_NA_	Hypoxia-inducible factor 1-alpha	Q16665 (HIF1A_HUMAN)	30962421	HIF-1alpha in article
IFNG	Interferon gamma	HGNC:5438	Interferon gamma released from CD8+ T cells downregulates the expression of SLC3A2 and SLC7A11, and as a consequence, promotes tumour cell lipid peroxidation and ferroptosis.	BODIPY-C11, liperfluo staining, cell death measurement, FACS, cell proliferation and viability assay, qPCR, immunoblotting, glutathione quantification, MDA assay, glutamate assay	Human, mice	HT-1080, A375, B16-F0, ID8 cells, female NSG and C57BL/6 mice	IFNG :-: SLC3A2, IFNG :-: SLC7A11, SLC3A2 :+: System Xc-, SLC7A11 :+: System Xc-, System Xc- :+: Cystine, Cystine :-: Lipid ROS, Lipid ROS :+: Ferroptosis	Validated	_NA_	Interferon gamma	P01579 (IFNG_HUMAN)	31043744	IFNgamma in article
ANO6	Anoctamin 6	HGNC:25240	Essential for ferroptosis. Inhibition blocked ferroptotic cell death induced by RSL3/erastin.	Immunocytochemistry, RT-PCR, TUNEL Assay, flow Cytometry, LDH assay, gene knockout, siRNA	Human, mice	A549, Cal27, HT29 and MG-63 cells, Cx3cr1-Cre mice	ANO6 :+: Ferroptosis	Validated	_NA_	Anoctamin-6	Q4KMQ2 (ANO6_HUMAN)	31060306	_NA_
LPIN1	Lipin 1	HGNC:13345	Overexpression of adipose lipin‐1 in mice facilitated the onset of hepatic ferroptosis.	Enzyme‐linked immunosorbent assay, lipid peroxidation assay, iron assay, MDA assay, qPCR, GSH assay	Mice	C57BL/6 mice	LPIN1 :+: Ferroptosis	Validated	_NA_	Phosphatidate phosphatase LPIN1	Q14693 (LPIN1_HUMAN)	31061954	_NA_
HMGB1	High mobility group box 1	HGNC:4983	Required for erastin-induced ferroptosis. Knockdown of HMGB1 decreased erastin-induced cell death.	Gene transfection, RNAi, cell viability assay, ELISA, LDH assay, flow cytometry, qPCR, western blot, electron microscopy	Human, mice	HL-60 cell, male NOD/SCID mice	HMGB1 :+: Ferroptosis	Validated	_NA_	High mobility group protein B1	P09429 (HMGB1_HUMAN)	31105999	_NA_
TNFAIP3	TNF alpha induced protein 3	HGNC:11896	Overexpression increased ROS generation and enhanced erastin-induced ferroptosis, whereas knockdown inhibited erastin-induced ferroptosis.	Lentivirus transduction, CCK-8 assay, DYE670 staining assay, ROS staining assay, RT-qPCR, western blot	Human	HUVEC cells	TNFAIP3 :+: ACSL4, ACSL4 :+: Lipid ROS, TNFAIP3 :-: GPX4, GPX4 :-: Lipid ROS, Lipid ROS :+: Ferroptosis	Validated	_NA_	Tumor necrosis factor alpha-induced protein 3	P21580 (TNAP3_HUMAN)	31160087	Zinc lipoprotein A20 in article
TLR4	Toll like receptor 4	HGNC:11850	Knockdown inhibited ferroptosis.	Immunohistochemistry, western blot, cell death assay, siRNA	Rat	Sprague Dawley rats	TLR4 :+: Ferroptosis	Validated	_NA_	Toll-like receptor 4	O00206 (TLR4_HUMAN)	31196626	_NA_
ATF3	Activating transcription factor 3	HGNC:785	Promotes ferroptosis induced by erastin.	Cell viability assay, transfection, lentiviral infection, qRT-PCR, western blot	Human	HT1080 cells, retinal pigment epithelial cells	ATF3 :-: SLC7A11, SLC7A11 :+: System Xc-, System Xc- :+: GSH, GSH :-: Lipid ROS, Lipid ROS :+: Ferroptosis	Validated	_NA_	Cyclic AMP-dependent transcription factor ATF-3	P18847 (ATF3_HUMAN)	31273299	_NA_
ATM	ATM serine/threonine kinase	HGNC:795	Essential for ferroptosis. Genetic knockdown and chemical inhibition of ATM both suppress ferroptotic cell death.	siRNA, western blot, nuclear/cytosol fraction, cell viability, cell death, GSH assay, kinome screen, qRT-PCR, immunofluorescence assay	Human	MDA-MB-231, RCC4, 293T, and HT-1080 cell lines	ATM :-: MTF1, MTF1 :+: FTL, MTF1 :+: FTH1, FTL :-: Ferroptosis, FTH1 :-: Ferroptosis	Validated	_NA_	Serine-protein kinase ATM	Q13315 (ATM_HUMAN)	31320750	_NA_
YY1AP1	YY1 associated protein 1	HGNC:30935	Makes cells more sensitive to ferroptosis. Cells lacking YAP were no longer sensitised to ferroptosis.	Cell death, cell viability, lipid peroxidation, immunoblotting, CRISPR/Cas9, ChIP assay, qRT-PCR	Human, mice	Mouse embryonic fibroblasts, NF639 cells, human epithelial tumour cells, human mesothelioma cells, xenograft mouse	YAP :+: ACSL4, ACSL4 :+: Ferroptosis, YAP :+: TFRC, TFRC :+: Ferroptosis	Validated	_NA_	YY1-associated protein 1	Q9H869 (YYAP1_HUMAN)	31341276	YAP in article
EGLN2	Egl-9 family hypoxia inducible factor 2	HGNC:14660	Inhibiting EGLN2 activation diminished ferroptotic tumor cell death.	Cytotoxicity assays, western blot, immunoprecipitation, RNA interference, gene transfection, qPCR, MDA assay	Human, mice	Calu-1, THP1, HT1080, and HL-60 cells, athymic nude mice	EGLN2 :-: HIF1A, HIF1A :-: Lipid ROS, Lipid ROS :+: Ferroptosis	Validated	_NA_	Egl nine homolog 2	Q96KS0 (EGLN2_HUMAN)	31355331	_NA_
MIOX	Myo-inositol oxygenase	HGNC:14522	Overexpression exacerbates cell death, knockdown inhibits ferroptosis.	MTT assay, measurement of GPX4 activity, labile iron pool assay, evaluation of cell death and cell morphology, immunohistochemical staining	Human, mice	HK-2 cells, C57BL/6J mice	MIOX :-: GPX4, GPX4 :-: Ferroptosis, MIOX :-: GSH, GSH :-: Ferroptosis	Validated	_NA_	Inositol oxygenase	Q9UGB7 (MIOX_HUMAN)	31437128	_NA_
TAZ	Tafazzin	HGNC:11577	TAZ removal confers ferroptosis resistance, whereas overexpression of TAZS89A sensitizes cells to ferroptosis.	Cell viability, cell death, western blot, siRNA, qRT-PCR, microarray, immunofluorescence staining, ChIP-seq, Lipid ROS assay	Human, mice	RCC4, 786O cells, JAX NOD.CB17-PrkdcSCID-J mice	TAZ :+: EMP1, EMP1 :+: NOX4, NOX4 :+: Lipid ROS, Lipid ROS :+: Ferroptosis	Validated	_NA_	Tafazzin	Q16635 (TAZ_HUMAN)	31484063	_NA_
MTDH	Metadherin	HGNC:29608	Can enhance sensitivity to inducers of ferroptosis. Enhances the vulnerability of cancer cells to ferroptosis.	Cell viability, qRT-PCR, western blotting, GSH assay, GPx4 activity assay, tumor xenograft model	Human, mice	Cell lines A549, H1975, DMS53, DMS273, KLE, AN3CA, RL95, Hec1A, Ishikawa, MDA-MB-231, MCF-7, Hec50, immunodeficient mice	MTDH :-: Cysteine, Cystein :-: Ferroptosis, MTDH :-: SLC3A2, SLC3A2 :-: Ferroptosis, MTDH :-: GPX4, GPX4 :-: Ferroptosis, MTDH :-: GSH, GSH :-: Ferroptosis, MTDH :+: Glutamate, Glutamate :+: Ferroptosis	Validated	_NA_	Protein LYRIC	Q86UE4 (LYRIC_HUMAN)	31527591	_NA_
IDH1	Isocitrate dehydrogenase (NADP(+)) 1	HGNC:5382	Deletion of the mutant IDH1 allele or pharmacological inhibition of mutant IDH1 confers resistance to erastin-induced ferroptosis. Ectopic expression of mutant IDH1 promotes ferroptosis.	Cell transfection, cell viability, GSH assay, lipid ROS assay	Human	HEK293T, HT-1080 and KYSE-170 cells	IDH1 :-: GPX4, GPX4 :-: Lipid ROS, Lipid ROS :+: Ferroptosis, IDH1 :-: GSH, GSH :-: Ferroptosis	Validated	_NA_	Isocitrate dehydrogenase [NADP] cytoplasmic	O75874 (IDHC_HUMAN)	31591388	_NA_
SIRT1	Sirtuin 1	HGNC:14929	Knockout partially mitigates ferroptosis.	Lipid peroxidation, iron and GSH assay, qRT-PCR, western blot	Mice	Mice in C57BL/6 background	SIRT1 :+: Ferroptosis	Predicted	_NA_	NAD-dependent protein deacetylase sirtuin-1	Q96EB6 (SIR1_HUMAN)	31610175	_NA_
FBXW7	F-box and WD repeat domain containing 7	HGNC:16712	FBXW7 plasmid induces ferroptosis.	Cell viability, lipid peroxidation, iron, GSH and ROS assays, western blot, RT-PCR, RNA-seq	Human, mice	Hepatic stellate cells, C57BL/6 mice	FBXW7 :+: Ferroptosis	Deduced	_NA_	F-box/WD repeat-containing protein 7	Q969H0 (FBXW7_HUMAN)	31679460	_NA_
PANX1	Pannexin 1	HGNC:8599	Deletion protects against ferroptotic cell death. Silenced Panx1 expression significantly attenuated ferroptotic lipid peroxidation and iron accumulation induced by the ferroptosis inducer erastin.	Cell viability, cell death, qRT-PCR, western blot, lipid peroxidation detection, shRNA	Human, mice	HK-2 cells, C57BL/6 mice	PANX1 :-: HMOX1, HMOX1 :-: Ferroptosis, PANX1 :+: MAPK/ERK, MAPK/ERK :+: Ferroptinophagy, Ferroptinophagy :+: Ferroptosis	Validated	_NA_	Pannexin-1	Q96RD7 (PANX1_HUMAN)	31694915	_NA_
DNAJB6	DnaJ heat shock protein family (Hsp40) member B6	HGNC:14888	Promotes ferroptosis in esophageal squamous cell carcinoma.	Western blot, immunohistochemistry,lentivirus infection, colony-forming, RT‑qPCR, CCK-8, transwell and mouse xenograft assays	Human, mice	Cell lines TE-1, Eca9706, Eca109, KYSE150, and KYSE450, BALB/c athymic nude mice	DNAJB6 :-: GPX4, GPX4 :-: Ferroptosis	Predicted	_NA_	DnaJ homolog subfamily B member 6	O75190 (DNJB6_HUMAN)	31701262	_NA_
BACH1	BTB domain and CNC homolog 1	HGNC:935	Promotes ferroptosis by repressing the transcription of a subset of the erastin-induced protective genes.	Western blotting, qPCR, cell death, labile iron detection, RNA-seq	Mice	C57BL/6J mice, mouse embryonic fibroblasts	BACH1 :+: Lipid ROS, Lipid ROS :+: Ferroptosis	Validated	_NA_	Transcription regulator protein BACH1	O14867 (BACH1_HUMAN)	31740582	_NA_
LONP1	Lon peptidase 1, mitochondrial	HGNC:9479	Inhibition of LONP1 negatively regulates erastin-induced cell death.	Cell viability, western blot, qRT-PCR, lipid peroxidation assay, glutathione assay	Human	PANC1, BxPC3 cells	LONP1 :-: Nrf2/Keap1 pathway, Nrf2/Keap1 pathway :-: Ferroptosis, LONP1 :-: GPX4, GPX4 :-: Ferroptosis	Validated	_NA_	Lon protease homolog, mitochondrial	P36776 (LONM_HUMAN)	31822343	_NA_
Marker
PTGS2	Prostaglandin-endoperoxide synthase 2	HGNC:9605	Simply a downstream marker of ferroptosis. The most upregulated gene in BJeLR cells upon treatment with either erastin or (1S, 3R)-RSL3, but ferroptotic cell death was not affected by inhibition of the enzyme.	RT-qPCR, cell viability	Human	BJeLR cells	Validated	_NA_	Prostaglandin G/H synthase 2	P35354 (PGH2_HUMAN)	24439385	May promote ferroptosis.
DUSP1	Dual specificity phosphatase 1	HGNC:3064	Expression was upregulated during ferroptosis induced by erastin or RSL3.	RT-qPCR, cell viability	Human	BJeLR cells	Deduced	Inferred as ferroptotic marker because of change (|delta ct| > 2) in gene expression.	Dual specificity protein phosphatase 1	P28562 (DUS1_HUMAN)	24439385	May promote ferroptosis.
NOS2	Nitric oxide synthase 2	HGNC:7873	Expression was upregulated during ferroptosis induced by erastin or RSL3.	RT-qPCR, cell viability	Human	BJeLR cells	Deduced	Inferred as ferroptotic marker because of change (|delta ct| > 2) in gene expression.	Nitric oxide synthase	P35228 (NOS2_HUMAN)	24439385	May promote ferroptosis.
NCF2	Neutrophil cytosolic factor 2	HGNC:7661	Expression was upregulated during ferroptosis induced by erastin or RSL3.	RT-qPCR, cell viability	Human	BJeLR cells	Deduced	Inferred as ferroptotic marker because of change (|delta ct| > 2) in gene expression.	Neutrophil cytosol factor 2	P19878 (NCF2_HUMAN)	24439385	May promote ferroptosis.
MT3	Metallothionein 3	HGNC:7408	Expression was upregulated during ferroptosis induced by erastin or RSL3.	RT-qPCR, cell viability	Human	BJeLR cells	Deduced	Inferred as ferroptotic marker because of change (|delta ct| > 2) in gene expression.	Metallothionein-3	P25713 (MT3_HUMAN)	24439385	May promote ferroptosis.
UBC	Ubiquitin C	HGNC:12468	Expression was upregulated during ferroptosis induced by erastin or RSL3.	RT-qPCR, cell viability	Human	BJeLR cells	Deduced	Inferred as ferroptotic marker because of change (|delta ct| > 2) in gene expression.	Polyubiquitin-C	P0CG48 (UBC_HUMAN)	24439385	May promote ferroptosis.
ALB	Albumin	HGNC:399	Expression was upregulated during ferroptosis induced by erastin or RSL3.	RT-qPCR, cell viability	Human	BJeLR cells	Deduced	Inferred as ferroptotic marker because of change (|delta ct| > 2) in gene expression.	Serum albumin	P02768 (ALBU_HUMAN)	24439385	May promote ferroptosis.
TXNRD1	Thioredoxin reductase 1	HGNC:12437	Expression was upregulated during ferroptosis induced by erastin or RSL3.	RT-qPCR, cell viability	Human	BJeLR cells	Deduced	Inferred as ferroptotic marker because of change (|delta ct| > 2) in gene expression.	Thioredoxin reductase 1	Q16881 (TRXR1_HUMAN)	24439385	May promote ferroptosis.
SRXN1	Sulfiredoxin 1	HGNC:16132	Expression was upregulated during ferroptosis induced by erastin or RSL3.	RT-qPCR, cell viability	Human	BJeLR cells	Deduced	Inferred as ferroptotic marker because of change (|delta ct| > 2) in gene expression.	Sulfiredoxin-1	Q9BYN0 (SRXN1_HUMAN)	24439385	May promote ferroptosis.
GPX2	Glutathione peroxidase 2	HGNC:4554	Expression was upregulated during ferroptosis induced by erastin or RSL3.	RT-qPCR, cell viability	Human	BJeLR cells	Deduced	Inferred as ferroptotic marker because of change (|delta ct| > 2) in gene expression.	Glutathione peroxidase 2	P18283 (GPX2_HUMAN)	24439385	May promote ferroptosis.
BNIP3	BCL2 interacting protein 3	HGNC:1084	Expression was upregulated during ferroptosis induced by erastin or RSL3.	RT-qPCR, cell viability	Human	BJeLR cells	Deduced	Inferred as ferroptotic marker because of change (|delta ct| > 2) in gene expression.	BCL2/adenovirus E1B 19 kDa protein-interacting protein 3	Q12983 (BNIP3_HUMAN)	24439385	May promote ferroptosis.
OXSR1	Oxidative stress responsive kinase 1	HGNC:8508	Expression was upregulated during ferroptosis induced by erastin or RSL3.	RT-qPCR, cell viability	Human	BJeLR cells	Deduced	Inferred as ferroptotic marker because of change (|delta ct| > 2) in gene expression.	Serine/threonine-protein kinase OSR1	O95747 (OXSR1_HUMAN)	24439385	May promote ferroptosis.
SELENOS	Selenoprotein S	HGNC:30396	Expression was upregulated during ferroptosis induced by erastin or RSL3.	RT-qPCR, cell viability	Human	BJeLR cells	Deduced	Inferred as ferroptotic marker because of change (|delta ct| > 2) in gene expression.	Selenoprotein S	Q9BQE4 (SELS_HUMAN)	24439385	SELS in article. May promote ferroptosis.
ANGPTL7	Angiopoietin like 7	HGNC:24078	Expression was downregulated during ferroptosis induced by erastin or RSL3.	RT-qPCR, cell viability	Human	BJeLR cells	Deduced	Inferred as ferroptotic marker because of change (|delta ct| > 2) in gene expression.	Angiopoietin-related protein 7	O43827 (ANGL7_HUMAN)	24439385	May promote ferroptosis.
DDIT4	DNA damage inducible transcript 4	HGNC:24944	Up-regulated (>= 2 fold) in erastin-treated samples.	RNA-seq	Human	HT-1080 cells	Screened	Further study needed to confirm connection to ferroptosis.	DNA damage-inducible transcript 4 protein	Q9NX09 (DDIT4_HUMAN)	24844246	May promote ferroptosis.
LOC284561	_NA_	_NA_	Up-regulated (>= 2 fold) in erastin-treated samples.	RNA-seq	Human	HT-1080 cells	Screened	Further study needed to confirm connection to ferroptosis.	_NA_	_NA_	24844246	Not found in HGNC. May promote ferroptosis.
ASNS	Asparagine synthetase (glutamine-hydrolyzing)	HGNC:753	Up-regulated (>= 2 fold) in erastin-treated samples.	RNA-seq	Human	HT-1080 cells	Screened	Further study needed to confirm connection to ferroptosis.	Asparagine synthetase [glutamine-hydrolyzing]	P08243 (ASNS_HUMAN)	24844246	May promote ferroptosis.
TSC22D3	TSC22 domain family member 3	HGNC:3051	Up-regulated (>= 2 fold) in erastin-treated samples.	RNA-seq	Human	HT-1080 cells	Screened	Further study needed to confirm connection to ferroptosis.	TSC22 domain family protein 3	Q99576 (T22D3_HUMAN)	24844246	May promote ferroptosis.
DDIT3	DNA damage inducible transcript 3	HGNC:2726	Up-regulated (>= 2 fold) in erastin-treated samples.	RNA-seq	Human	HT-1080 cells	Screened	Further study needed to confirm connection to ferroptosis.	DDIT3 upstream open reading frame protein	P0DPQ6 (DT3UO_HUMAN)	24844246	May promote ferroptosis.
JDP2	Jun dimerization protein 2	HGNC:17546	Up-regulated (>= 2 fold) in erastin-treated samples.	RNA-seq	Human	HT-1080 cells	Screened	Further study needed to confirm connection to ferroptosis.	Jun dimerization protein 2	Q8WYK2 (JDP2_HUMAN)	24844246	May promote ferroptosis.
SLC1A4	Solute carrier family 1 member 4	HGNC:10942	Up-regulated (>= 2 fold) in erastin-treated samples.	RNA-seq	Human	HT-1080 cells	Screened	Further study needed to confirm connection to ferroptosis.	Neutral amino acid transporter A	P43007 (SATT_HUMAN)	24844246	May promote ferroptosis.
PCK2	Phosphoenolpyruvate carboxykinase 2, mitochondrial	HGNC:8725	Up-regulated (>= 2 fold) in erastin-treated samples.	RNA-seq	Human	HT-1080 cells	Screened	Further study needed to confirm connection to ferroptosis.	Phosphoenolpyruvate carboxykinase [GTP]	Q16822 (PCKGM_HUMAN)	24844246	May promote ferroptosis.
TXNIP	Thioredoxin interacting protein	HGNC:16952	Up-regulated (>= 2 fold) in erastin-treated samples.	RNA-seq	Human	HT-1080 cells	Screened	Further study needed to confirm connection to ferroptosis.	Thioredoxin-interacting protein	Q9H3M7 (TXNIP_HUMAN)	24844246	May promote ferroptosis.
VLDLR	Very low density lipoprotein receptor	HGNC:12698	Up-regulated (>= 2 fold) in erastin-treated samples.	RNA-seq	Human	HT-1080 cells	Screened	Further study needed to confirm connection to ferroptosis.	Very low-density lipoprotein receptor	P98155 (VLDLR_HUMAN)	24844246	May promote ferroptosis.
GPT2	Glutamic--pyruvic transaminase 2	HGNC:18062	Up-regulated (>= 2 fold) in erastin-treated samples.	RNA-seq	Human	HT-1080 cells	Screened	Further study needed to confirm connection to ferroptosis.	Alanine aminotransferase 2	Q8TD30 (ALAT2_HUMAN)	24844246	May promote ferroptosis.
PSAT1	Phosphoserine aminotransferase 1	HGNC:19129	Up-regulated (>= 2 fold) in erastin-treated samples.	RNA-seq	Human	HT-1080 cells	Screened	Further study needed to confirm connection to ferroptosis.	Phosphoserine aminotransferase	Q9Y617 (SERC_HUMAN)	24844246	May promote ferroptosis.
LURAP1L	Leucine rich adaptor protein 1 like	HGNC:31452	Up-regulated (>= 2 fold) in erastin-treated samples.	RNA-seq	Human	HT-1080 cells	Screened	Further study needed to confirm connection to ferroptosis.	Leucine rich adaptor protein 1-like	Q8IV03 (LUR1L_HUMAN)	24844246	C9ORF150 in article. May promote ferroptosis.
SLC7A5	Solute carrier family 7 member 5	HGNC:11063	Up-regulated (>= 2 fold) in erastin-treated samples.	RNA-seq	Human	HT-1080 cells	Screened	Further study needed to confirm connection to ferroptosis.	Large neutral amino acids transporter small subunit 1	Q01650 (LAT1_HUMAN)	24844246	May promote ferroptosis.
HERPUD1	Homocysteine inducible ER protein with ubiquitin like domain 1	HGNC:13744	Up-regulated (>= 2 fold) in erastin-treated samples.	RNA-seq	Human	HT-1080 cells	Screened	Further study needed to confirm connection to ferroptosis.	Homocysteine-responsive endoplasmic reticulum-resident ubiquitin-like domain member 1 protein	Q15011 (HERP1_HUMAN)	24844246	May promote ferroptosis.
XBP1	X-box binding protein 1	HGNC:12801	Up-regulated (>= 2 fold) in erastin-treated samples.	RNA-seq	Human	HT-1080 cells	Screened	Further study needed to confirm connection to ferroptosis.	X-box-binding protein 1	P17861 (XBP1_HUMAN)	24844246	May promote ferroptosis.
ZNF419	Zinc finger protein 419	HGNC:20648	Up-regulated (>= 2 fold) in erastin-treated samples.	RNA-seq	Human	HT-1080 cells	Screened	Further study needed to confirm connection to ferroptosis.	Zinc finger protein 419	Q96HQ0 (ZN419_HUMAN)	24844246	May promote ferroptosis.
KLHL24	Kelch like family member 24	HGNC:25947	Up-regulated (>= 2 fold) in erastin-treated samples.	RNA-seq	Human	HT-1080 cells	Screened	Further study needed to confirm connection to ferroptosis.	Kelch-like protein 24	Q6TFL4 (KLH24_HUMAN)	24844246	May promote ferroptosis.
TRIB3	Tribbles pseudokinase 3	HGNC:16228	Up-regulated (>= 2 fold) in erastin-treated samples.	RNA-seq	Human	HT-1080 cells	Screened	Further study needed to confirm connection to ferroptosis.	Tribbles homolog 3	Q96RU7 (TRIB3_HUMAN)	24844246	May promote ferroptosis.
ZFP69B	ZFP69 zinc finger protein B	HGNC:28053	Up-regulated (>= 2 fold) in erastin-treated samples.	RNA-seq	Human	HT-1080 cells	Screened	Further study needed to confirm connection to ferroptosis.	Zinc finger protein 69 homolog B	Q9UJL9 (ZF69B_HUMAN)	24844246	ZNF643 in article. May promote ferroptosis.
ATP6V1G2	ATPase H+ transporting V1 subunit G2	HGNC:862	Up-regulated (>= 2 fold) in erastin-treated samples.	RNA-seq	Human	HT-1080 cells	Screened	Further study needed to confirm connection to ferroptosis.	V-type proton ATPase subunit G 2	O95670 (VATG2_HUMAN)	24844246	May promote ferroptosis.
VEGFA	Vascular endothelial growth factor A	HGNC:12680	Up-regulated (>= 2 fold) in erastin-treated samples.	RNA-seq	Human	HT-1080 cells	Screened	Further study needed to confirm connection to ferroptosis.	Vascular endothelial growth factor A	P15692 (VEGFA_HUMAN)	24844246	May promote ferroptosis.
GDF15	Growth differentiation factor 15	HGNC:30142	Up-regulated (>= 2 fold) in erastin-treated samples.	RNA-seq	Human	HT-1080 cells	Screened	Further study needed to confirm connection to ferroptosis.	Growth/differentiation factor 15	Q99988 (GDF15_HUMAN)	24844246	May promote ferroptosis.
TUBE1	Tubulin epsilon 1	HGNC:20775	Up-regulated (>= 2 fold) in erastin-treated samples.	RNA-seq	Human	HT-1080 cells	Screened	Further study needed to confirm connection to ferroptosis.	Tubulin epsilon chain	Q9UJT0 (TBE_HUMAN)	24844246	May promote ferroptosis.
ARRDC3	Arrestin domain containing 3	HGNC:29263	Up-regulated (>= 2 fold) in erastin-treated samples.	RNA-seq	Human	HT-1080 cells	Screened	Further study needed to confirm connection to ferroptosis.	Arrestin domain-containing protein 3	Q96B67 (ARRD3_HUMAN)	24844246	May promote ferroptosis.
CEBPG	CCAAT enhancer binding protein gamma	HGNC:1837	Up-regulated (>= 2 fold) in erastin-treated samples.	RNA-seq	Human	HT-1080 cells	Screened	Further study needed to confirm connection to ferroptosis.	CCAAT/enhancer-binding protein gamma	P53567 (CEBPG_HUMAN)	24844246	May promote ferroptosis.
SNORA16A	Small nucleolar RNA, H/ACA box 16A	HGNC:32605	Down-regulated (>= 2 fold) in erastin-treated samples.	RNA-seq	Human	HT-1080 cells	Screened	Further study needed to confirm connection to ferroptosis.	_NA_	_NA_	24844246	May inhibit ferroptosis.
RGS4	Regulator of G protein signaling 4	HGNC:10000	Down-regulated (>= 2 fold) in erastin-treated samples.	RNA-seq	Human	HT-1080 cells	Screened	Further study needed to confirm connection to ferroptosis.	Regulator of G-protein signaling 4	P49798 (RGS4_HUMAN)	24844246	May inhibit ferroptosis.
BLOC1S5-TXNDC5	BLOC1S5-TXNDC5 readthrough (NMD candidate)	HGNC:42001	Down-regulated (>= 2 fold) in erastin-treated samples.	RNA-seq	Human	HT-1080 cells	Screened	Further study needed to confirm connection to ferroptosis.	_NA_	_NA_	24844246	MUTED-TXNDC5 in article. May inhibit ferroptosis.
LOC390705	_NA_	_NA_	Down-regulated (>= 2 fold) in erastin-treated samples.	RNA-seq	Human	HT-1080 cells	Screened	Further study needed to confirm connection to ferroptosis.	_NA_	_NA_	24844246	Not found in HGNC. May inhibit ferroptosis.
EIF2S1	Eukaryotic translation initiation factor 2 subunit 1	HGNC:3265	Phosphorylated in erastin-treated sample.	Western blot	Human	HT-1080 cells	Deduced	_NA_	Eukaryotic translation initiation factor 2 subunit 1	P05198 (IF2A_HUMAN)	24844246	eIF2alpha in article. May promote ferroptosis.
KIM-1	Kidney injury molecule-1	_NA_	Down-regulated upon Fer-1 appearance	Real-time quantitative RT-PCR	Mice	Fer-1–treated CaOx model	Deduced	_NA_	_NA_	_NA_	25385600	Not found in HGNC. May promote ferroptosis.
IL6	Interleukin 6	HGNC:6018	Down-regulated upon Fer-1 appearance	Real-time quantitative RT-PCR	Mice	Fer-1–treated CaOx model	Deduced	_NA_	Interleukin-6	P05231 (IL6_HUMAN)	25385600	IL-6 in article. May promote ferroptosis.
CXCL2	C-X-C motif chemokine ligand 2	HGNC:4603	Down-regulated upon Fer-1 appearance	Real-time quantitative RT-PCR	Mice	Fer-1–treated CaOx model	Deduced	_NA_	C-X-C motif chemokine 2	P19875 (CXCL2_HUMAN)	25385600	May promote ferroptosis.
RELA	RELA proto-oncogene, NF-kB subunit	HGNC:9955	Down-regulated upon Fer-1 appearance	Real-time quantitative RT-PCR	Mice	Fer-1–treated CaOx model	Deduced	_NA_	Transcription factor p65	Q04206 (TF65_HUMAN)	25385600	p65 in article. May promote ferroptosis.
HSD17B11	Hydroxysteroid 17-beta dehydrogenase 11	HGNC:22960	Enriched in RSL3-resistant cells.	Gene trap insertion	Human	Chronic myeloid leukemia cell line KBM7	Screened	_NA_	Estradiol 17-beta-dehydrogenase 11	Q8NBQ5 (DHB11_HUMAN)	25965523	May promote ferroptosis.
AGPAT3	1-acylglycerol-3-phosphate O-acyltransferase 3	HGNC:326	Enriched in RSL3-resistant cells.	Gene trap insertion	Human	Chronic myeloid leukemia cell line KBM7	Screened	_NA_	1-acyl-sn-glycerol-3-phosphate acyltransferase gamma	Q9NRZ7 (PLCC_HUMAN)	25965523	May promote ferroptosis.
SETD1B	SET domain containing 1B, histone lysine methyltransferase	HGNC:29187	Enriched in GPX4 inhibitor ML162-resistant cells.	Gene trap insertion	Human	Chronic myeloid leukemia cell line KBM7	Screened	_NA_	Histone-lysine N-methyltransferase SETD1B	Q9UPS6 (SET1B_HUMAN)	25965523	May promote ferroptosis.
FTL	Ferritin light chain	HGNC:3999	Its expression is decreased in patients.	Gene expression analysis	Human	Patient PDAC tissues	Deduced	_NA_	Ferritin light chain	P02792 (FRIL_HUMAN)	26097885	May promote ferroptosis.
MAFG	MAF bZIP transcription factor G	HGNC:6781	The interaction between NRF2 and MafG was increased in response to erastin and sorafenib.	Western blot	Human, mice	HepG2, Hepa1‐6, Hep3B, and SNU‐182 cells	Deduced	_NA_	Transcription factor MafG	O15525 (MAFG_HUMAN)	26403645	May inhibit ferroptosis.
IL33	Interleukin 33	HGNC:16028	IL-33 upregulation is a feature of ferroptosis. Ferrostatin-1, an inhibitor of ferroptosis, prevented the upregulation of IL-33.	Western blot, quantitative PCR, ELISA	Mice	C57BL/6 mice	Deduced	_NA_	Interleukin-33	O95760 (IL33_HUMAN)	27352622	IL-33 in article. May promote ferroptosis.
HAMP	Hepcidin antimicrobial peptide	HGNC:15598	Erastin-induced mRNA expression is downregulated in FANCD2-deficient cells.	Q-PCR	Mice	Bone marrow stromal cells	Deduced	_NA_	Hepcidin	P81172 (HEPC_HUMAN)	27773819	May inhibit ferroptosis.
STEAP3	STEAP3 metalloreductase	HGNC:24592	Erastin-induced mRNA expression is downregulated in FANCD2-deficient cells.	Q-PCR	Mice	Bone marrow stromal cells	Deduced	_NA_	Metalloreductase STEAP3	Q658P3 (STEA3_HUMAN)	27773819	May inhibit ferroptosis.
DRD5	Dopamine receptor D5	HGNC:3026	Ferroptotic erastin induces DRD5 gene expression in ferroptosis.	Western blot, Q-PCR	Human	PANC1 cells	Deduced	_NA_	D(1B) dopamine receptor	P21918 (DRD5_HUMAN)	27793671	May promote ferroptosis.
DRD4	Dopamine receptor D4	HGNC:3025	Antiferroptotic dopamine suppressed dopamine receptor D4 protein degradation. Ferroptotic erastin promotes DRD4 protein degradation.	Western blot, Q-PCR	Human	PANC1 cells	Deduced	_NA_	D(4) dopamine receptor	P21917 (DRD4_HUMAN)	27793671	May inhibit ferroptosis.
MAP3K5	Mitogen-activated protein kinase kinase kinase 5	HGNC:6857	Cold stress evokes ferroptosis, and the ASK1‐p38 pathway is activated downstream of lipid peroxide, leading to the cell death. ASK1‐p38 axis is also activated in the erastin‐induced ferroptosis model.	LDH assay, immunoblot, RNAi, CCK-8	Human	A549 cells	Deduced	_NA_	Mitogen-activated protein kinase kinase kinase 5	Q99683 (M3K5_HUMAN)	28887319	ASK1 in article. May promote ferroptosis.
SLC2A1	Solute carrier family 2 member 1	HGNC:11005	Increased at LSH overexpression. Decreased at LSH knockdown. LSH can inhibit ferroptosis.	ChIP analysis, RT-qPCR	Human	H358, A549 cells	Deduced	_NA_	Solute carrier family 2	P11166 (GTR1_HUMAN)	28900510	GLUT1 in article. May inhibit ferroptosis.
SLC2A3	Solute carrier family 2 member 3	HGNC:11007	Decreased at LSH knockdown. LSH can inhibit ferroptosis.	RT-qPCR	Human	H358, A549 cells	Deduced	_NA_	Solute carrier family 2	P11169 (GTR3_HUMAN)	28900510	GLUT3 in article. May inhibit ferroptosis.
SLC2A6	Solute carrier family 2 member 6	HGNC:11011	Increased at LSH overexpression. Decreased at LSH knockdown. LSH can inhibit ferroptosis.	RT-qPCR	Human	H358, A549 cells	Deduced	_NA_	Solute carrier family 2	Q9UGQ3 (GTR6_HUMAN)	28900511	GLUT6 in article. May inhibit ferroptosis.
SLC2A8	Solute carrier family 2 member 8	HGNC:13812	Decreased at LSH knockdown. LSH can inhibit ferroptosis.	RT-qPCR	Human	H358, A549 cells	Deduced	_NA_	Solute carrier family 2	Q9NY64 (GTR8_HUMAN)	28900512	GLUT8 in article. May inhibit ferroptosis.
SLC2A12	Solute carrier family 2 member 12	HGNC:18067	Increased at LSH overexpression. Decreased at LSH knockdown. LSH can inhibit ferroptosis.	RT-qPCR	Human	H358, A549 cells	Deduced	_NA_	Solute carrier family 2	Q8TD20 (GTR12_HUMAN)	28900513	GLUT12 in article. May inhibit ferroptosis.
GLUT13	_NA_	_NA_	Increased at LSH overexpression. Decreased at LSH knockdown. LSH can inhibit ferroptosis.	RT-qPCR	Human	H358, A549 cells	Deduced	_NA_	_NA_	_NA_	28900514	Not found in HGNC. May inhibit ferroptosis.
SLC2A14	Solute carrier family 2 member 14	HGNC:18301	Decreased at LSH knockdown. LSH can inhibit ferroptosis.	RT-qPCR	Human	H358, A549 cells	Deduced	_NA_	Solute carrier family 2	Q8TDB8 (GTR14_HUMAN)	28900515	GLUT14 in article. May inhibit ferroptosis.
EIF2AK4	Eukaryotic translation initiation factor 2 alpha kinase 4	HGNC:19687	CHAC1 degradation of GSH enhances cystine-starvation-induced ferroptosis through the activated GCN2-eIF2 alpha-ATF4 pathway.	Western blot, real-time PCR, cell viability assay, siRNA, GSH assay kit	Human	MDA-MB-231, Hs 578T, and HCC 1937 cells	Deduced	_NA_	eIF-2-alpha kinase GCN2	Q9P2K8 (E2AK4_HUMAN)	29383104	GCN2 in article. May promote ferroptosis.
TFAP2C	Transcription factor AP-2 gamma	HGNC:11744	Activated by ferroptosis inhibitor selenium.	Behavioral analysis, infarct volume analysis, immunocytochemistry, TUNEL staining, fluoro-jade Staining, qRT-PCR, cell death assay, ChIP assay, siRNA, western blot, immunoblotting, RNA-seq, mass spectrometry	Mice	C57BL/6 mice, primary cortical neurons, HT22 murine hippocampal cells	Deduced	_NA_	Transcription factor AP-2 gamma	Q92754 (AP2C_HUMAN)	31056284	May inhibit ferroptosis.
SP1	Sp1 transcription factor	HGNC:11205	Activated by ferroptosis inhibitor selenium.	Behavioral analysis, infarct volume analysis, immunocytochemistry, TUNEL staining, fluoro-jade Staining, qRT-PCR, cell death assay, ChIP assay, siRNA, western blot, immunoblotting, RNA-seq, mass spectrometry	Mice	C57BL/6 mice, primary cortical neurons, HT22 murine hippocampal cells	Deduced	_NA_	Transcription factor Sp1	P08047 (SP1_HUMAN)	31056284	May inhibit ferroptosis.
HBA1	Hemoglobin subunit alpha 1	HGNC:4823	Upregulated in cells treated with ferroptosis inducer erastin. Stimulates ferroptosis possibly in a GSH-dependent manner.	Tandem mass tags, RNA-seq, DNase-seq, qPCR, Western blot, IHC	Human	HepG2, Bel-7402 cells	Deduced	_NA_	Hemoglobin subunit alpha	P69905 (HBA_HUMAN)	31108460	May promote ferroptosis.
NNMT	Nicotinamide N-methyltransferase	HGNC:7861	Upregulated in cells treated with ferroptosis inducer erastin. Stimulates ferroptosis possibly in a GSH-dependent manner.	Tandem mass tags, RNA-seq, DNase-seq, qPCR, Western blot, IHC	Human	HepG2, Bel-7402 cells	Deduced	_NA_	Nicotinamide N-methyltransferase	P40261 (NNMT_HUMAN)	31108460	May promote ferroptosis.
PLIN4	Perilipin 4	HGNC:29393	Upregulated in cells treated with ferroptosis inducer erastin. Stimulates ferroptosis possibly in a GSH-dependent manner.	Tandem mass tags, RNA-seq, DNase-seq, qPCR, Western blot, IHC	Human	HepG2, Bel-7402 cells	Deduced	_NA_	Perilipin-4	Q96Q06 (PLIN4_HUMAN)	31108460	May promote ferroptosis.
HIC1	HIC ZBTB transcriptional repressor 1	HGNC:4909	Essential for stimulation of pro-ferroptotic gene transcription upon ferroptosis induction.	Immunohistochemistry, immunofluorescence, western blot, qPCR, metabolites examination, ChIP	Human	HepG2, Bel-7402 cells	Deduced	_NA_	Hypermethylated in cancer 1 protein	Q14526 (HIC1_HUMAN)	31108460	May promote ferroptosis.
STMN1	Stathmin 1	HGNC:6510	Downregulated in cells treated with ferroptosis inducer erastin. Suppresses ferroptosis possibly in a GSH-dependent manner.	Tandem mass tags, RNA-seq, DNase-seq, qPCR, Western blot, IHC	Human	HepG2, Bel-7402 cells	Deduced	_NA_	Stathmin	P16949 (STMN1_HUMAN)	31108460	May inhibit ferroptosis.
RRM2	Ribonucleotide reductase regulatory subunit M2	HGNC:10452	Downregulated in cells treated with ferroptosis inducer erastin. Suppresses ferroptosis possibly in a GSH-dependent manner.	Tandem mass tags, RNA-seq, DNase-seq, qPCR, Western blot, IHC	Human	HepG2, Bel-7402 cells	Deduced	_NA_	Ribonucleoside-diphosphate reductase subunit M2	P31350 (RIR2_HUMAN)	31108460	May inhibit ferroptosis.
CAPG	Capping actin protein, gelsolin like	HGNC:1474	Downregulated in cells treated with ferroptosis inducer erastin. Suppresses ferroptosis possibly in a GSH-dependent manner.	Tandem mass tags, RNA-seq, DNase-seq, qPCR, Western blot, IHC	Human	HepG2, Bel-7402 cells	Deduced	_NA_	Macrophage-capping protein	P40121 (CAPG_HUMAN)	31108460	May inhibit ferroptosis.
HNF4A	Hepatocyte nuclear factor 4 alpha	HGNC:5024	Essential for stimulation of anti-ferroptotic gene transcription.	Immunohistochemistry, immunofluorescence, western blot, qPCR, metabolites examination, ChIP	Human	HepG2, Bel-7402 cells	Deduced	_NA_	Hepatocyte nuclear factor 4-alpha	P41235 (HNF4A_HUMAN)	31108460	May inhibit ferroptosis.
NGB	Neuroglobin	HGNC:14077	Human neuroglobin (hNgb)-EGFP-expressing SH-SY5Y cells to be significantly more resistant to ferroptosis induction.	Cell death, cell viability, lipid peroxidation assay, RT-qPCR	Human	SH-SY5Y cells	Deduced	_NA_	Neuroglobin	Q9NPG2 (NGB_HUMAN)	31405213	May inhibit ferroptosis.
YWHAE	Tyrosine 3-monooxygenase/tryptophan 5-monooxygenase activation protein epsilon	HGNC:12851	Required by RSL3 (a ferroptosis inducer) to inactivate GPX4 (a ferroptosis inhibitor).	Mass spectrometry, siRNA, western blot	Human	HEK293T cells	Deduced	_NA_	14-3-3 protein epsilon	P62258 (1433E_HUMAN)	31581313	14-3-3epsilon in article. May promote ferroptosis.
GABPB1	GA binding protein transcription factor subunit beta 1	HGNC:4074	Downregulated by lncRNA GABPB1-AS1 upon erastin treatment.	RT-qPCR, western blot, siRNA, cell viability, lipid peroxidation assay	Human	HepG2, Huh7, and Hep3B cells	Deduced	_NA_	GA-binding protein subunit beta-1	Q06547 (GABP1_HUMAN)	31700067	May inhibit ferroptosis.
AURKA	Aurora kinase A	HGNC:11393	Inhibition of AURKA or reconstitution of miR-4715-3p inhibited GPX4 and induced cell death, suggesting a link between AURKA and ferroptosis.	qRT-PCR, western blot, lentiviral infection, CellTiter-Glo luminescence assay	Human	OE33, STKM2, MKN45 cells	Predicted	_NA_	Aurora kinase A	O14965 (AURKA_HUMAN)	31740746	May inhibit ferroptosis.
MIR4715	microRNA 4715	HGNC:41666	Inhibition of AURKA or reconstitution of miR-4715-3p inhibited GPX4 and induced cell death, suggesting a link between AURKA and ferroptosis.	qRT-PCR, western blot, lentiviral infection, CellTiter-Glo luminescence assay	Human	OE33, STKM2, MKN45 cells	Predicted	_NA_	_NA_	_NA_	31740746	miR-4715-3p in article. May promote ferroptosis.
RIPK1	Receptor interacting serine/threonine kinase 1	HGNC:10019	Reduced expression results in resistance to ferroptosis.	Cell viability, western blot, RNA-seq, GSH assay, qRT-PCR, immunofluorescence imaging	Human	Patient-derived fibroblasts	Deduced	_NA_	Receptor-interacting serine/threonine-protein kinase 1	Q13546 (RIPK1_HUMAN)	31827280	May promote ferroptosis.
PRDX1	Peroxiredoxin 1	HGNC:9352	Necessary to ferroptosis-related lipid peroxidation.	Western blot, siRNA, flow cytometry, cell viability, RT-PCR	Human	Primary corneal endothelial cells, B4G12 and HT1080 cells	Deduced	_NA_	Peroxiredoxin-1	Q06830 (PRDX1_HUMAN)	31901729	May promote ferroptosis.
MIR30B	microRNA 30b	HGNC:31625	Upregulation of miR-30b-5p in preeclampsia models plays a pivotal role in ferroptosis.	GSH assay, MDA measurement, western blot, immunohistochemistry, microarray, RT-qPCR, labile iron assay, cell viability, LDH assay	Human, rat	Trophoblasts, preeclampsia model, HTR-8/SVneo and TEV-1 cells	Deduced	_NA_	_NA_	_NA_	31926626	miR-30b-5p in article. May promote ferroptosis.
Suppressor
SLC7A11	Solute carrier family 7 member 11	HGNC:11059	Silencing of SLC7A11 sensitized HT-1080 cells to erastin-induced death, whereas transfection of HT-1080 cells with a plasmid encoding SLC7A11 conferred protection from erastin- and sulfasalazine-induced death.	RT-qPCR, siRNA, gene transfection, cell viability	Human	HT-1080 cells	SLC7A11 :+: Cystine, Cystine :-: Ferroptosis	Validated	_NA_	Cystine/glutamate transporter	Q9UPY5 (XCT_HUMAN)	22632970	_NA_
GPX4	Glutathione peroxidase 4	HGNC:4556	RNAi-mediated GPX4 knockdown induces ferroptosis.	Affinity-based chemoproteomics, western blotting, and RNAi	Human, mice	HRAS mutant BJeLR-engineered tumor cells, HT-1080 cells, xenograft mouse model (athymic nude mice injected with four million HT-1080 cells)	GPX4 :-: Lipid ROS, Lipid ROS :+: Ferroptosis	Validated	_NA_	Phospholipid hydroperoxide glutathione peroxidase	P36969 (GPX4_HUMAN)	24439385	_NA_
AKR1C1	Aldo-keto reductase family 1 member C1	HGNC:384	Up-regulated in DU-145 erastin-resistant clones. Participate in the detoxification of toxic lipid metabolites. May confer partial resistance to erastin by enhancing the detoxification of reactive aldehydes generated downstream of the oxidative destruction of the plasma membrane during ferroptosis.	RNA-seq, glutamate release assay, cell growth, flow cytometry	Human	DU-145 prostate cancer cells	AKR1C1 :-: Ferroptosis	Validated	_NA_	Aldo-keto reductase family 1 member C1	Q04828 (AK1C1_HUMAN)	24844246	_NA_
AKR1C2	Aldo-keto reductase family 1 member C2	HGNC:385	Up-regulated in DU-145 erastin-resistant clones. Participate in the detoxification of toxic lipid metabolites. May confer partial resistance to erastin by enhancing the detoxification of reactive aldehydes generated downstream of the oxidative destruction of the plasma membrane during ferroptosis.	RNA-seq, glutamate release assay, cell growth, flow cytometry	Human	DU-145 prostate cancer cells	AKR1C2 :-: Ferroptosis	Validated	_NA_	Aldo-keto reductase family 1 member C2	P52895 (AK1C2_HUMAN)	24844246	_NA_
AKR1C3	Aldo-keto reductase family 1 member C3	HGNC:386	Up-regulated in DU-145 erastin-resistant clones. Participate in the detoxification of toxic lipid metabolites. May confer partial resistance to erastin by enhancing the detoxification of reactive aldehydes generated downstream of the oxidative destruction of the plasma membrane during ferroptosis.	RNA-seq, glutamate release assay, cell growth, flow cytometry	Human	DU-145 prostate cancer cells	AKR1C3 :-: Ferroptosis	Validated	_NA_	Aldo-keto reductase family 1 member C3	P42330 (AK1C3_HUMAN)	24844246	_NA_
RB1	RB transcriptional corepressor 1	HGNC:9884	Rb knock-down cells exposed to sorafenib encounter ferroptosis. Lack of Rb sensitized HCC cells to the induction of ferroptosis.	RNA interference, cell viability assay, oxidative stress measurement	Human, mice	HCC cell lines Huh7 and PLC/PRF5; Balb/c nude mice received tumour xenografts derived from HCC cells.	RB1 :-: Ferroptosis	Validated	_NA_	Retinoblastoma-associated protein	P06400 (RB_HUMAN)	25444922	_NA_
HSPB1	Heat shock protein family B (small) member 1	HGNC:5246	Knockdown of HSF1 and HSPB1 enhances erastin-induced ferroptosis, whereas heat shock pretreatment and overexpression of HSPB1 inhibits erastin-induced ferroptosis.	RNAi, RT-qPCR, western blot, cell viability	Human, mice	HeLa and U2OS cells, human xenograft mouse tumor derived from HeLa (#CCL-2) cells.	HSPB1 :-: Ferroptosis	Validated	_NA_	Heat shock protein beta-1	P04792 (HSPB1_HUMAN)	25728673	_NA_
HSF1	Heat shock transcription factor 1	HGNC:5224	Knockdown of HSF1 and HSPB1 enhances erastin-induced ferroptosis, whereas heat shock pretreatment and overexpression of HSPB1 inhibits erastin-induced ferroptosis.	RNAi, RT-qPCR, western blot, cell viability	Human, mice	HeLa and U2OS cells, human xenograft mouse tumor derived from HeLa (#CCL-2) cells.	HSF1 :-: Ferroptosis	Validated	_NA_	Heat shock factor protein 1	Q00613 (HSF1_HUMAN)	25728673	_NA_
GCLC	Glutamate-cysteine ligase catalytic subunit	HGNC:4311	RNAi knockdown sensitized cell death induced by cystine starvation.	RNAi, qPCR	Mice	Mouse embryonic fibroblasts	GCLC :+: GSH, GSH :-: Ferroptosis	Validated	_NA_	Glutamate--cysteine ligase catalytic subunit	P48506 (GSH1_HUMAN)	26166707	_NA_
NFE2L2	Nuclear factor, erythroid 2 like 2	HGNC:7782	NRF2 plays a central role in protecting hepatocellular carcinoma (HCC) cells against ferroptosis	Cell Viability Analysis, western blot, RNAi, qRT-PCR	Human, mice	HepG2, Hepa1‐6, Hep3B, and SNU‐182 cells, C57BL/6 mice	NFE2L2 :+: (NQO1/HMOX1/FTH1), (NQO1/HMOX1/FTH1) :-: Ferroptosis	Validated	_NA_	Nuclear factor erythroid 2-related factor 2	Q16236 (NF2L2_HUMAN)	26403645	NRF2 in article
SQSTM1	Sequestosome 1	HGNC:11280	The interaction between p62 and Keap1 increased following erastin and sorafenib treatment. Knockdown of p62 suppressed NRF2 expression and promoted growth inhibition with increased ferroptotic events including GSH depletion, lipid ROS production, and an increase of iron levels.	Immunoprecipitation assay, shRNA knockdown, iron assay, lipid peroxidation assay, glutathione assay, cell viability	Human, mice	HepG2, Hepa1‐6, Hep3B, and SNU‐182 cells	SQSTM1 :-: KEAP1, KEAP1 :-: NFE2L2, NFE2L2 :-: Ferroptosis	Validated	_NA_	Sequestosome-1	Q13501 (SQSTM_HUMAN)	26403645	p62 in article.
NQO1	NAD(P)H quinone dehydrogenase 1	HGNC:2874	Knockdown of p62, quinone oxidoreductase‐1, heme oxygenase‐1, and ferritin heavy chain‐1 by RNA interference in HCC cells promoted ferroptosis in response to erastin and sorafenib.	qRT‐PCR, RNA interference	Human, mice	HepG2, Hepa1‐6, Hep3B, and SNU‐182 cells	NQO1 :-: Ferroptosis	Validated	_NA_	NAD(P)H dehydrogenase [quinone] 1	P15559 (NQO1_HUMAN)	26403645	_NA_
FTH1	Ferritin heavy chain 1	HGNC:3976	Knockdown of p62, quinone oxidoreductase‐1, heme oxygenase‐1, and ferritin heavy chain‐1 by RNA interference in HCC cells promoted ferroptosis in response to erastin and sorafenib.	qRT‐PCR, RNA interference	Human, mice	HepG2, Hepa1‐6, Hep3B, and SNU‐182 cells	FTH1 :-: Ferroptosis	Validated	_NA_	Ferritin heavy chain	P02794 (FRIH_HUMAN)	26403645	_NA_
MUC1	Mucin 1, cell surface associated	HGNC:7508	MUC1-C (C-terminal subunit) blocks erastin-induced ferroptosis and induces increases in GSH.	shRNA, GSH level measurement, cell death test	Human	MDA-MB-468, BT-20 cells	MUC1 :+: System Xc-, System Xc- :+: GSH, GSH :-: Ferroptosis	Validated	_NA_	Mucin-1	P15941 (MUC1_HUMAN)	26930718	_NA_
SLC3A2	Solute carrier family 3 member 2	HGNC:11026	Required for in vitro cell survival because of its role in protecting cells from ferroptosis.	Cell survival test	Mice	Mouse ES-derived fibroblasts	SLC3A2 :+: System Xc-, System Xc- :-: Ferroptosis	Validated	_NA_	4F2 cell-surface antigen heavy chain	P08195 (4F2_HUMAN)	26945935	CD98hc in article
MT1G	Metallothionein 1G	HGNC:7399	A negative regulator of ferroptosis in HCC cells. Knockdown of MT‐1G by RNA interference increases glutathione depletion and lipid peroxidation, which contributes to sorafenib‐induced ferroptosis.	RNA interference, cell viability assay, colony formation assay, western blot, qRT-PCR, glutathione assay, lipid peroxidation assay	Human, mice	HCC cells (HepaG2, Hep3B, and Huh7 cells), nude mice.	MT1G :-: Ferroptosis	Validated	_NA_	Metallothionein-1G	P13640 (MT1G_HUMAN)	27015352	MT‐1G in article
SLC40A1	Solute carrier family 40 member 1	HGNC:10909	Involved in siramesine and lapatinib-induced ferroptotic cell death. Its expression is decreased after treatment with siramesine alone or in combination with lapatinib. Overexpression FPN resulted in decreased ROS and cell death whereas knockdown of FPN increased cell death after siramesine and lapatinib treatment.	Western blot, densitometry quantification, siRNA, gene transfection, cell death test	Human	MDA MB 231 and SKBr3 cells	SLC40A1 :-: Lipid ROS, Lipid ROS :+: Ferroptosis	Validated	_NA_	Solute carrier family 40 member 1	Q9NP59 (S40A1_HUMAN)	27441659	Ferroportin-1 (FPN) in article
CISD1	CDGSH iron sulfur domain 1	HGNC:30880	Genetic inhibition of CISD1 contributes to erastin-induced ferroptosis. Stabilization of the iron sulfur cluster of CISD1 inhibits ferroptosis.	Cytotoxicity assays, western blot, q-PCR, RNAi	Human	HepG2 and Hep3B cells	CISD1 :-: Mitochondrial lipid ROS, Mitochondrial lipid ROS :+: Ferroptosis	Validated	_NA_	CDGSH iron-sulfur domain-containing protein 1	Q9NZ45 (CISD1_HUMAN)	27510639	_NA_
FANCD2	FA complementation group D2	HGNC:3585	Inhibits erastin-induced ferroptosis. Plays a novel role in the negative regulation of ferroptosis.	Cell viability assay, Q-PCR, western blot, iron assay, lipid peroxidation assay, glutathione assay	Mice	Bone marrow stromal cells	FANCD2 :-: Ferroptosis	Validated	_NA_	Fanconi anemia group D2 protein	Q9BXW9 (FACD2_HUMAN)	27773819	_NA_
FTMT	Ferritin mitochondrial	HGNC:17345	Overexpression significantly inhibited erastin-induced ferroptosis.	Cell viability assay, western blot	Mice, fly	SH-SY5Y cells, drosophila melanogasters W1118, elav-Gal4 and UAS-Fer3HCH	FTMT :-: Labile iron pool, Labile iron pool :+: Ferroptosis	Validated	_NA_	Ferritin	Q8N4E7 (FTMT_HUMAN)	28066232	_NA_
HSPA5	Heat shock protein family A (Hsp70) member 5	HGNC:5238	Negatively regulates ferroptosis. Suppression of HSPA5 expression increased erastin-induced death. Overexpressed HSPA5 inhibited erastin-induced ferroptotic cell death.	Cell viability assay, western blot, shRNA, gene transfection	Human, mice	Pancreatic ductal adenocarcinoma cell lines (PANC1, CFPAC1, MiaPaCa2), nude mice, B6 mice	HSPA5 :+: GPX4, GPX4 :-: Lipid ROS, Lipid ROS :+: Ferroptosis	Validated	_NA_	Endoplasmic reticulum chaperone BiP	P11021 (BIP_HUMAN)	28130223	_NA_
ATF4	Activating transcription factor 4	HGNC:786	Inhibition of ATF4 expression increased erastin-induced cell death. ATF4 results in the induction of HSPA5, which in turn protects against GPX4 protein degradation and subsequent ferroptosis.	CCK8 cell viability assay, clonogenic cell survival assay, western blot, q-PCR, RNAi	Human	Pancreatic ductal adenocarcinoma cells (e.g., PANC1, CFPAC1, MiaPaCa2, and Panc2.03)	ATF4 :+: HSPA5, HSPA5 :+: GPX4, GPX4 :-: Lipid ROS, Lipid ROS :+: Ferroptosis	Validated	_NA_	Cyclic AMP-dependent transcription factor ATF-4	P18848 (ATF4_HUMAN)	28130223	_NA_
HELLS	Helicase, lymphoid specific	HGNC:4861	LSH inhibits ferroptosis by decreasing the intracellular levels of iron and lipid ROS.	Plate-colony formation assay; measurement of total ROS, Lipid ROS, and intracellular iron	Human, mice	Lung cancer H358 and PC9 cells, SCID Mice	HELLS :+: GLUT1, HELLS :+: SCD, HELLS :+: FADS2, GLUT1 :-: Ferroptosis, SCD :-: Ferroptosis, FADS2 :-: Ferroptosis	Validated	_NA_	Lymphoid-specific helicase	Q9NRZ9 (HELLS_HUMAN)	28900510	LSH in article
SCD	Stearoyl-CoA desaturase	HGNC:10571	Depletion of the SCD1 and FADS2 metabolic genes induces ferroptosis.	shRNA, RT-qPCR, MTT assay, total iron detection, lipid ROS detection	Human	A549 cancer cells	SCD :-: Ferroptosis	Validated	_NA_	Acyl-CoA desaturase	O00767 (ACOD_HUMAN)	28900510	SCD1 in article
FADS2	Fatty acid desaturase 2	HGNC:3575	Depletion of the SCD1 and FADS2 metabolic genes induces ferroptosis.	shRNA, RT-qPCR, MTT assay, total iron detection, lipid ROS detection	Human	A549 cancer cells	FADS2 :-: Ferroptosis	Validated	_NA_	Acyl-CoA 6-desaturase	O95864 (FADS2_HUMAN)	28900510	_NA_
SRC	SRC proto-oncogene, non-receptor tyrosine kinase	HGNC:11283	Src-STAT3 activation renders the cell unable to undergo to ferroptosis. Src inhibition decreased cell viability significantly, and that loss of viability was rescued by ferroptosis inhibitors.	Immunoblotting, RNAi, qPCR, western blot, cell viability	Human	MCF-10A and SUM-159 cells	SRC :+: STAT3, STAT3 :-: ACSL4, ACSL4 :+: Ferroptosis	Validated	_NA_	Proto-oncogene tyrosine-protein kinase Src	P12931 (SRC_HUMAN)	28972104	_NA_
STAT3	Signal transducer and activator of transcription 3	HGNC:11364	Src-STAT3 activation renders the cell unable to undergo to ferroptosis.	Immunoblotting, RNAi, qPCR, western blot, cell viability	Human	MCF-10A and SUM-159 cells	STAT3 :-: ACSL4, ACSL4 :+: Ferroptosis	Validated	_NA_	Signal transducer and activator of transcription 3	P40763 (STAT3_HUMAN)	28972104	_NA_
PML	Promyelocytic leukemia	HGNC:9113	PML expression turned cells highly resistant to ferroptosis.	Cell death assessment	Human	IMR90 cells	PML :-: Ferroptosis	Validated	_NA_	Protein PML	P29590 (PML_HUMAN)	29081404	_NA_
MTOR	Mechanistic target of rapamycin kinase	HGNC:3942	Necessary and sufficient to protect cardiomyocyte cells against ferroptotic cell death. mTOR overexpression suppressed ferroptotic cell death, whereas mTOR deletion exaggerated cell death.	Cell viability assay, ROS production assay, western blot	Mice	Cardiomyocyte cell, C57BL/6 mice	MTOR :-: Ferroptosis	Validated	_NA_	Serine/threonine-protein kinase mTOR	P42345 (MTOR_HUMAN)	29127238	_NA_
NFS1	NFS1 cysteine desulfurase	HGNC:15910	Suppression of NFS1 cooperates with inhibition of cysteine transport to trigger ferroptosis in vitro and slow tumour growth. Suppression of NFS1 predisposes cancer cells to ferroptosis.	RNAi, cell viability assay,flow cytometry	Human	MDA-MB-231 cells, NOD.CB17 Scid/J mice	NFS1 :-: TFRC, TFRC :+: Ferroptosis	Validated	_NA_	Cysteine desulfurase	Q9Y697 (NFS1_HUMAN)	29168506	_NA_
TP63	Tumor protein p63	HGNC:15979	Delta Np63 alpha can inhibit ferroptosis independent of p53. Overexpression protects cells from ferroptosis-inducing agents.	siRNA, cell death quantification	Human	ME-180 cells	TP63 :-: Ferroptosis	Validated	_NA_	Tumor protein 63	Q9H3D4 (P63_HUMAN)	29212036	Delta Np63 alpha in article
CDKN1A	Cyclin dependent kinase inhibitor 1A	HGNC:1784	Required to to suppress ferroptosis.	CRISPR, shRNA, immunoblotting, cell-cycle profile, cell death quantification	Human	HT-1080 cells	CDKN1A :+: GSH, GSH :-: Lipid ROS, Lipid ROS :+: Ferroptosis	Validated	_NA_	Cyclin-dependent kinase inhibitor 1	P38936 (CDN1A_HUMAN)	29346757	Encoding p21
MIR137	microRNA 137	HGNC:31523	Suppresses ferroptosis both in vitro and in vivo.	Immunoblotting, luciferase reporter assay, qRT-PCR, cell viability assay, colony formation assay, malondialdehyde assay, iron assay, flow cytometer, shRNA, xenograph mouse model	Human, mice	Melanoma cell lines A375 and G-361, C57BL/6 mice	MIR137 :-: SLC1A5, SLC1A5 :+: Glutaminolysis, Glutaminolysis :+: Lipid ROS, Lipid ROS :+: Ferroptosis	Validated	_NA_	_NA_	_NA_	29348676	_NA_
ENPP2	Ectonucleotide pyrophosphatase/phosphodiesterase 2	HGNC:3357	Overexpression modestly promotes migration and proliferation and significantly inhibits erastin-induced ferroptosis.	Cell viability assay, qRT-PCR, western blot, ROS measurement, ELISA	Rat	H9c2 cells	ENPP2 :-: Ferroptosis	Validated	_NA_	Ectonucleotide pyrophosphatase/phosphodiesterase family member 2	Q13822 (ENPP2_HUMAN)	29551679	_NA_
FH	Fumarate hydratase	HGNC:3700	FH inactivation (FH-/- ) proves synthetic lethal with inducers of ferroptosis. FH-/- sensitizes cells to multiple ferroptosis inducers.	CRISPR/Cas9, sgRNA, cell viability assay, immunoblotting, qPCR,	Human	UOK262, HT1080, HK2, A498 cells	FH :+: GPX4, GPX4 :-: Ferroptosis	Validated	_NA_	Fumarate hydratase	P07954 (FUMH_HUMAN)	29917289	_NA_
CISD2	CDGSH iron sulfur domain 2	HGNC:24212	Overexpression conferred resistance to ferroptosis. Inhibition blocked resistance to ferroptotic cell death.	Cell viability and death assay, GSH and ROS levels and lipid peroxidation assays, RNAi, gene transfection, immunoblotting	Human	Head and neck cancer cells	CISD2 :-: Lipid ROS, Lipid ROS :+: Ferroptosis	Validated	_NA_	CDGSH iron-sulfur domain-containing protein 2	Q8N5K1 (CISD2_HUMAN)	29928961	_NA_
MIR9-1	microRNA 9-1	HGNC:31641	Overexpression of miR‐9 suppressed GOT1, which subsequently reduced ferroptosis. Suppression of miR‐9 increased the sensitivity of melanoma cells to ferroptosis inducers.	Immunoblotting, luciferase reporter assay, qPCR, cell viability assay, MDA assay, iron assay, glutamate assay	Human	A375 and G‐361 cells	MIR9 :-: GOT1, GOT1 :+: alpha KG, alpha KG :+: Lipid ROS, Lipid ROS :+: Ferroptosis	Validated	_NA_	_NA_	_NA_	30035324	miR-9 in article
MIR9-2	microRNA 9-2	HGNC:31642	Overexpression of miR‐9 suppressed GOT1, which subsequently reduced ferroptosis. Suppression of miR‐9 increased the sensitivity of melanoma cells to ferroptosis inducers.	Immunoblotting, luciferase reporter assay, qPCR, cell viability assay, MDA assay, iron assay, glutamate assay	Human	A375 and G‐361 cells	MIR9 :-: GOT1, GOT1 :+: alpha KG, alpha KG :+: Lipid ROS, Lipid ROS :+: Ferroptosis	Validated	_NA_	_NA_	_NA_	30035324	miR-9 in article
MIR9-3	microRNA 9-3	HGNC:31646	Overexpression of miR‐9 suppressed GOT1, which subsequently reduced ferroptosis. Suppression of miR‐9 increased the sensitivity of melanoma cells to ferroptosis inducers.	Immunoblotting, luciferase reporter assay, qPCR, cell viability assay, MDA assay, iron assay, glutamate assay	Human	A375 and G‐361 cells	MIR9 :-: GOT1, GOT1 :+: alpha KG, alpha KG :+: Lipid ROS, Lipid ROS :+: Ferroptosis	Validated	_NA_	_NA_	_NA_	30035324	miR-9 in article
CBS	Cystathionine beta-synthase	HGNC:1550	Inhibition triggers ferroptosis in hepatocellular carcinoma.	Cell viability, western blotting, LC/ESI-MS/MS, flow cytometry, xenograft mice	Human, mice	HepG2 cells, female ICR mice	CBS :-: Ferroptosis	Validated	_NA_	Cystathionine beta-synthase	P35520 (CBS_HUMAN)	30258181	_NA_
ISCU	Iron-sulfur cluster assembly enzyme	HGNC:29882	Over expression significantly attenuated DHA induced ferroptosis.	Cell viability, cell cycle, ROS determination, western blot, immunofluorescence, ectopic expressing, lentiviral transduction	Human	HL60, KG1, THP-1 cells	ISCU :+: GSH, GSH :-: Ferroptosis	Validated	_NA_	Iron-sulfur cluster assembly enzyme ISCU	Q9H1K1 (ISCU_HUMAN)	30557609	_NA_
ACSL3	Acyl-CoA synthetase long chain family member 3	HGNC:3570	Required for exogenous monounsaturated fatty acids to protect cells against ferroptosis. Negatively correlates with ferroptosis sensitivity.	Dead cell count, gene knockout, confocal imaging, thin-layer chromatography, BODIPY 493/503 imaging, CRISPR/Cas9, RT-qPCR, western blot	Human	HEK293, HT-1080 cells	ACSL3 :-: Ferroptosis	Validated	_NA_	Long-chain-fatty-acid--CoA ligase 3	O95573 (ACSL3_HUMAN)	30686757	_NA_
OTUB1	OTU deubiquitinase, ubiquitin aldehyde binding 1	HGNC:23077	Inactivation promotes ferroptosis by down-regulating SLC7A11 levels. Overexpression is critical for tumor growth.	CRISPR/Cas9, RNAi, cell death, western blot, qRT-PCR	Human, mice	H1299, SK-N-BE(2)C, T24, UM-UC-3, SW780 cells, nude mice	OTUB1 :+: SLC7A11, SLC7A11 :-: Ferroptosis	Validated	_NA_	Ubiquitin thioesterase OTUB1	Q96FW1 (OTUB1_HUMAN)	30709928	_NA_
CD44	CD44 molecule (Indian blood group)	HGNC:1681	Knockdown sensitizes cells to ferroptosis.	Western blot, siRNA, cell death	Human	H1299 cells	CD44 :+: SLC7A11, SLC7A11 :-: Ferroptosis	Validated	_NA_	CD44 antigen	P16070 (CD44_HUMAN)	30709928	_NA_
LINC00336	Long intergenic non-protein coding RNA 336	HGNC:33813	Overexpression inhibits ferroptosis. Knockdown promotes ferroptosis.	qRT-PCR, MTT assay, colony-formation assay, lipid ROS assays, iron assay, immunoblotting	Human	A549 and SPC-A-1 cells	(LINC00336/ELAVL1) :-: Ferroptosis	Validated	_NA_	Putative uncharacterized protein encoded by LINC00336	Q6ZUF6 (NC336_HUMAN)	30787392	_NA_
BRD4	Bromodomain containing 4	HGNC:13575	Inhibition induces ferroptosis.	Cell proliferation assay, migration and invasion assays, RT-PCR, western blot, immunohistochemistry, iron assay	Human	MDA-MB-231, Hs578T, H1299, A549 and MCF-10A cells, female athymic BALB/c nude mice	BRD4 :-: Ferritinophagy, Ferritinophagy :+: Lipid ROS, Lipid ROS :+: Ferroptosis	Validated	_NA_	Bromodomain-containing protein 4	O60885 (BRD4_HUMAN)	30988278	_NA_
PRDX6	Peroxiredoxin 6	HGNC:16753	A negative regulator of ferroptotic cell death.	Western blot, flow cytometry, SRB assay, gene transfection, shRNA, LOOH quantification	Human	H1299 cells	PRDX6 :-: Lipid ROS, Lipid ROS :+: Ferroptosis	Validated	_NA_	Peroxiredoxin-6	P30041 (PRDX6_HUMAN)	31036877	_NA_
MIR17	microRNA 17	HGNC:31547	Protects endothelial HUVEC cells from erastin-induced ferroptosis. Overexpression significantly reduced erastin-induced growth inhibition and ROS generation of HUVEC cells.	Lentivirus transduction, CCK-8 assay, DYE670 staining assay, ROS staining assay, RT-qPCR, western blot	Human	HUVEC cells	MIR17 :-: A20, A20 :+: ACSL4, ACSL4 :+: Lipid ROS, A20 :-: GPX4, GPX4 :-: Lipid ROS, Lipid ROS :+: Ferroptosis	Validated	_NA_	_NA_	_NA_	31160087	miR-17-92 in article
SESN2	Sestrin 2	HGNC:20746	Has cytoprotective effect against ferroptosis. In cells expressing Sesn2, erastin-induced cell death, ROS formation, and glutathione depletion were almost completely inhibited compared to that in control cells.	MTT assay, RT-PCR, luciferase assay, immunoblot, siRNA, Lipid peroxidation assay, GSH measurement	Human, mice	HepG2 and AML-12 cell lines, mouse embryonic fibroblasts cells, ICR mice	SESN2 :-: Lipid ROS, Lipid ROS :+: Ferroptosis	Validated	_NA_	Sestrin-2	P58004 (SESN2_HUMAN)	31323261	Sesn2 in article
NF2	Neurofibromin 2	HGNC:7773	Genetic inactivation of NF2 rendered cancer cells more sensitive to ferroptosis. Mediates cell density-dependent inhibition of ferroptosis.	Cell death, cell viability, lipid peroxidation, immunoblotting, CRISPR/Cas9, ChIP assay, qRT-PCR	Human, mice	Mouse embryonic fibroblasts, NF639 cells, human epithelial tumour cells, human mesothelioma cells, xenograft mouse	NF2 :-: YAP, YAP :+: Ferroptosis	Validated	_NA_	Merlin	P35240 (MERL_HUMAN)	31341276	Also known as merlin
ARNTL	Aryl hydrocarbon receptor nuclear translocator like	HGNC:701	Degration of the protein is critical for ferroptosis. Blocking ARNTL degradation diminished ferroptotic tumor cell death.	Cytotoxicity assays, western blot, immunoprecipitation, RNA interference, gene transfection, qPCR, MDA assay	Human, mice	Calu-1, THP1, HT1080, and HL-60 cells, athymic nude mice	ARNTL :-: EGLN2, EGLN2 :-: HIF1A, HIF1A :-: Lipid ROS, Lipid ROS :+: Ferroptosis	Validated	_NA_	Aryl hydrocarbon receptor nuclear translocator-like protein 1	O00327 (BMAL1_HUMAN)	31355331	_NA_
JUN	Jun proto-oncogene, AP-1 transcription factor subunit	HGNC:6204	O-GlcNAcylated c-Jun represents an obstructive factor to ferroptosis.	Immunofluorescence, western blotting, immunohistochemistry, cell viability, colony formation, qPCR, lipid peroxidation assay, iron assay	Human, mice	Bel-7402, SMMC-7721 cells, athymic nude mice	JUN :+: GSH, GSH :-: Ferroptosis, JUN :+: PSAT1, PSAT1 :-: Ferroptosis, JUN :+: CBS, CBS :-: Ferroptosis	Deduced	_NA_	Transcription factor AP-1	P05412 (JUN_HUMAN)	31394193	c-Jun in article
CA9	Carbonic anhydrase 9	HGNC:1383	Inhibition induces ferroptosis.	qRT-PCR, western blot, cell viability assay, siRNA, ROS detection	Human	Mesothelioma cell lines ACC-Meso-1, NCI-H2373 and NCI-H2052, mesothelial cell line MeT-5A	CA9 :-: Ferroptosis	Validated	_NA_	Carbonic anhydrase 9	Q16790 (CAH9_HUMAN)	31442913	_NA_
TMBIM4	Transmembrane BAX inhibitor motif containing 4	HGNC:24257	Protects against ferroptosis in HCC cells. Inhibition increased ferroptotic cel death.	Cell viability and clonogenic survival assay, immunofluorescence, western blot, RNAi, gene transfection, qRT-PCR, lipid peroxidation assay	Human, mice	Hep G2, Huh‐7, SMMC‐7721 and PLC/PRF/5 cells, nude mice	S1R :-: Ferroptosis	Validated	_NA_	Protein lifeguard 4	Q9HC24 (LFG4_HUMAN)	31507082	S1R in article
PLIN2	Perilipin 2	HGNC:248	An indispensable gene and protein in the suppression of ferroptosis caused by abnormal lipometabolism in gastric carcinoma.	Cell proliferation and clonogenic assay, cell survival analysis, xenografts tumor, RNA-seq, RT‑qPCR, ROS assay	Human, mice	SGC7901 and MGC803 cells, nude mice	PLIN2 :-: Ferroptosis	Screened	_NA_	Perilipin-2	Q99541 (PLIN2_HUMAN)	31520166	Also known as ADRP
MIR212	microRNA 212	HGNC:31589	Overexpression of miR-212-5p attenuated ferroptosis while downregulation of miR-212-5p promoted ferroptotic cell death.	Controlled cortical impact model, iron assay, MDA assay, RT-PCR, western blotting, cell death	Mice	HT22 and Neuro-2a cells, C57BL/6 J mice	(miR-212-5p/Ptgs2) :-: Ferroptosis	Validated	_NA_	_NA_	_NA_	31533781	miR-212-5p in article
Fer1HCH	Ferritin 1 Heavy Chain Homolog	_NA_	Reduced heavy chain levels caused severe mitochondrial defects and ferroptosis.	RT-qPCR, immunohistochemistry, EdU staining, TUNEL staining	Drosophila	Fly	Fer1HCH :-: ROS, ROS :+: Ferroptosis	Predicted	_NA_	Ferritin	H1UUD2 (H1UUD2_DROME)	31568497	_NA_
AIFM2	Apoptosis inducing factor mitochondria associated 2	HGNC:21411	A glutathione-independent ferroptosis suppressor. Pharmacological targeting of FSP1 strongly synergizes with GPX4 inhibitors to trigger ferroptosis.	Expression cloning, cell death, cell viability, LDH assay, western blot, LC-MS, NADH consumption assay	Human, mice	MCF-7, HT1080, Pfa1 cells	FPS1 :+: CoQ10, CoQ10 :-: Lipid ROS, Lipid ROS :+: Ferroptosis	Validated	_NA_	Apoptosis-inducing factor 2	Q9BRQ8 (AIFM2_HUMAN)	31634899	FSP1 in article
LAMP2	Lysosomal associated membrane protein 2	HGNC:6501	Knockdown promoted ferroptosis.	Cell viability, western blot, ROS induction, glutathione assay, lipid peroxidation assay	Human	ARPE-19, hfRPE cells	LAMP2 :+: Cysteine, Cysteine :+: GSH, GSH :-: Lipid ROS, Lipid ROS :+: Ferroptosis	Validated	_NA_	Lysosome-associated membrane glycoprotein 2	P13473 (LAMP2_HUMAN)	31672277	_NA_
ZFP36	ZFP36 ring finger protein	HGNC:12862	ZFP36 plasmid impaired FBXW7 plasmid-induced HSC ferroptosis. Overexpression of Zfp36 impaired erastin- or sorafenib-induced ferroptosis.	Cell viability, lipid peroxidation, iron, GSH and ROS assays, western blot, RT-PCR, RNA-seq	Human, mice	Hepatic stellate cells, C57BL/6 mice	ZFP36 :-: ATG16L1, ATG16L1 :+: Ferroptosis	Validated	_NA_	mRNA decay activator protein ZFP36	P26651 (TTP_HUMAN)	31679460	_NA_
PROM2	Prominin 2	HGNC:20685	Induced by ferroptotic stress and promotes resistance to ferroptotic cell death. Facilitates ferroptosis resistance in mammary epithelial and breast carcinoma cells.	RNA-seq, western blot, qPCR, siRNA, cell count, cell death, iron assay	Human	MCF10A, Hs578t and MDA-MB-231 cells	Prominin2 :+: Ferritin-containing MVB, Ferritin-containing MVB :-: Ferroptosis	Validated	_NA_	Prominin-2	Q8N271 (PROM2_HUMAN)	31735663	Prominin2 in article
CHMP5	Charged multivesicular body protein 5	HGNC:26942	Ferroptosis activators increase ESCRT-III subunits (e.g., CHMP5 and CHMP6). Knockdown of CHMP5 or CHMP6 sensitizes human cancer cells to ferroptosis.	RNAi, western blot, iron, malondialdehyde and cytotoxicity assays	Human, mice	PANC1 and HepG2 cells, athymic nude or B6 mice	CHMP5 :-: Ferroptosis	Validated	_NA_	Charged multivesicular body protein 5	Q9NZZ3 (CHMP5_HUMAN)	31761326	_NA_
CHMP6	Charged multivesicular body protein 6	HGNC:25675	Ferroptosis activators increase ESCRT-III subunits (e.g., CHMP5 and CHMP6). Knockdown of CHMP5 or CHMP6 sensitizes human cancer cells to ferroptosis.	RNAi, western blot, iron, malondialdehyde and cytotoxicity assays	Human, mice	PANC1 and HepG2 cells, athymic nude or B6 mice	CHMP6 :-: Ferroptosis	Validated	_NA_	Charged multivesicular body protein 6	Q96FZ7 (CHMP6_HUMAN)	31761326	_NA_
CAV1	Caveolin 1	HGNC:1527	Cav-1 deficiency aggravated ferroptosis. Short hairpin RNA of Cav-1 promoted ferroptosis, which was ameliorated by Cav-1 overexpression.	Immunofluorescence, western blot, ROS detection	Human, mice	LO2 cells, mice model	CAV-1 :+: xCT, xCT :+: GPX4, GPX4 :-: Ferroptosis, CAV-1 :-: RNS, RNS :+: Ferroptosis	Validated	_NA_	Caveolin-1	Q03135 (CAV1_HUMAN)	31877357	Cav-1 in article
GCH1	GTP cyclohydrolase 1	HGNC:4193	Gch1 overexpression and its downstream metabolites BH4/BH2 rescue from ferroptosis. Inhibition of GCH1 activity can sensitize resistant cancer cells to ferroptosis induction.	CRISPR activation screening, qRT-PCR, cell viability, cell counts, western blot	Human	HT-1080,786-O, A-498, Caki-1, AU565, DU4475, MCF-7 cells	GCH1 :+: Phospholipid, Phospholipid :-: Ferroptosis, GCH1 :+: COQ10, COQ10 :-: Lipid ROS, Lipid ROS :+: Ferroptosis	Validated	_NA_	GTP cyclohydrolase 1	P30793 (GCH1_HUMAN)	31989025	_NA_

## Sheet: Supplementary Table 2
Supplementary Table 2. 296 ferroptosis-related lncRNAs filtered by the criteria setting at | R2| > 0.3 and P < 0.001.
Ferroptosis-related gene	LncRNA	cor_r	pvalue
RPL8	MIR22HG	-0.351625	2.74035e-13
RPL8	FENDRR	-0.355702	1.3902e-13
RPL8	SNHG15	0.452576	6.05261e-22
RPL8	AC092718.3	0.389381	3.48016e-16
RPL8	SLC12A9-AS1	0.342071	1.29384e-12
RPL8	VPS9D1-AS1	0.350406	3.35055e-13
RPL8	MNX1-AS1	0.363139	3.93133e-14
RPL8	LINC01357	0.304446	3.55087e-10
RPL8	EMSLR	0.425818	2.34178e-19
RPL8	AC145207.5	0.342631	1.18307e-12
RPL8	ZFAS1	0.485618	1.79821e-25
RPL8	AL023284.4	0.327991	1.15912e-11
RPL8	HOXA11-AS	0.312715	1.10453e-10
RPL8	ELFN1-AS1	0.358387	8.84521e-14
RPL8	SNHG6	0.54761	3.1977e-33
RPL8	AP003352.1	0.405853	1.43099e-17
RPL8	PRRT3-AS1	0.35019	3.47134e-13
RPL8	AC138305.3	0.3566	1.19573e-13
RPL8	AC005332.6	-0.337102	2.84127e-12
RPL8	GAS5	0.401181	3.60317e-17
RPL8	MINCR	0.312971	1.0647e-10
RPL8	AC015922.2	-0.310066	1.61203e-10
RPL8	SNHG7	0.41428	2.60788e-18
IREB2	LINC01082	-0.306522	2.65772e-10
IREB2	AC099850.3	0.423121	4.14791e-19
IREB2	AC012073.1	0.386925	5.51698e-16
IREB2	TRIM52-AS1	-0.366538	2.18274e-14
IREB2	AC074117.1	0.332513	5.80235e-12
IREB2	THAP9-AS1	0.348404	4.6521e-13
IREB2	AL355488.1	0.382947	1.15412e-15
IREB2	SNHG4	0.317818	5.27559e-11
IREB2	AL022322.1	0.345317	7.68103e-13
IREB2	SNHG1	0.386834	5.61134e-16
IREB2	AL928654.2	0.35376	1.9233e-13
IREB2	NORAD	0.348755	4.39251e-13
IREB2	AC090181.2	0.469007	1.19089e-23
IREB2	SPATA13	0.389474	3.42e-16
IREB2	EBLN3P	0.374126	5.72253e-15
IREB2	AC008735.2	0.448899	1.41646e-21
IREB2	SNHG3	0.336865	2.94892e-12
IREB2	AC018665.1	0.353807	1.90821e-13
IREB2	AC005288.1	0.317759	5.3215e-11
IREB2	AC005261.5	0.475779	2.2156e-24
IREB2	FLJ20021	-0.30665	2.61047e-10
ATP5MC3	RGS5	-0.303815	3.87621e-10
ATP5MC3	AL031587.5	-0.320669	3.4698e-11
ATP5MC3	MIR100HG	-0.317363	5.63824e-11
ATP5MC3	FENDRR	-0.3148	8.18045e-11
ATP5MC3	NORAD	-0.326715	1.40609e-11
ATP5MC3	AL391335.1	-0.311785	1.26188e-10
ATP5MC3	AP003071.3	-0.307248	2.40021e-10
ATP5MC3	CNN3-DT	-0.324067	2.09367e-11
ATP5MC3	WAC-AS1	-0.31617	6.70745e-11
ATP5MC3	LINC00265	-0.319905	3.88362e-11
ATP5MC3	TYMSOS	0.348606	4.50086e-13
ATP5MC3	AC005261.5	-0.355035	1.55453e-13
ATP5MC3	AF001548.2	-0.306862	2.53401e-10
ATP5MC3	ACTA2-AS1	-0.306806	2.55384e-10
ATP5MC3	LINC00294	-0.339352	1.99321e-12
ATP5MC3	AC015922.2	-0.338362	2.33074e-12
CS	LINC01082	-0.325881	1.59451e-11
CS	AC011472.4	-0.324521	1.95598e-11
CS	AC008808.2	-0.325754	1.62543e-11
CS	AC011472.1	-0.30617	2.79175e-10
CS	AC099850.3	0.30873	1.94781e-10
CS	SNHG4	0.343457	1.03634e-12
CS	MIR100HG	-0.307113	2.44634e-10
CS	FENDRR	-0.304577	3.48655e-10
CS	SNHG1	0.357025	1.11315e-13
CS	ZSCAN16-AS1	-0.312286	1.17453e-10
CS	SERTAD4-AS1	-0.339157	2.05566e-12
CS	CNN3-DT	-0.311356	1.34167e-10
CS	REPIN1-AS1	0.333963	4.63581e-12
CS	SNHG3	0.301008	5.70879e-10
CS	EMSLR	0.350154	3.49228e-13
CS	AC007342.4	0.326499	1.45271e-11
CS	AC100810.1	-0.346723	6.11676e-13
EMC2	THAP9-AS1	0.415752	1.92748e-18
EMC2	SNHG12	0.404716	1.79389e-17
EMC2	AC005034.3	0.401589	3.32591e-17
EMC2	SNHG1	0.443294	5.07636e-21
EMC2	MAPKAPK5-AS1	0.329487	9.23126e-12
EMC2	AL390728.5	0.32188	2.90011e-11
EMC2	AC024060.2	0.354153	1.80123e-13
EMC2	AC008735.2	0.337797	2.54732e-12
EMC2	CASC9	0.303167	4.23993e-10
EMC2	UBR5-AS1	0.638094	6.4692e-48
EMC2	AC120053.1	0.359935	6.80214e-14
EMC2	AC083799.1	0.348797	4.36268e-13
EMC2	JPX	0.316134	6.74245e-11
EMC2	SNHG6	0.39123	2.45392e-16
EMC2	OTUD6B-AS1	0.546511	4.53591e-33
EMC2	MINCR	0.319518	4.11135e-11
ACSF2	AC115619.1	0.413402	3.12114e-18
ACSF2	HNF4A-AS1	0.457188	2.05244e-22
ACSF2	AL357033.3	0.315046	7.89471e-11
ACSF2	LBX2-AS1	0.36167	5.05832e-14
ACSF2	MRPL20-AS1	0.306987	2.4897e-10
ACSF2	DSCR8	0.317195	5.77823e-11
NOX1	AL117382.1	0.305069	3.25602e-10
NOX1	LINC02086	0.314645	8.36641e-11
CYBB	PELATON	0.486283	1.51283e-25
CYBB	LINC01614	0.380368	1.85239e-15
CYBB	HLA-DQB1-AS1	0.4779	1.2981e-24
CYBB	PSMB8-AS1	0.352566	2.34516e-13
CYBB	COPDA1	0.324886	1.85196e-11
NOX3	DTNB-AS1	0.400704	3.95558e-17
NOX3	AC003070.1	0.352219	2.48371e-13
NOX3	AC124067.2	0.617269	4.16938e-44
NOX3	CCR5AS	0.420175	7.70133e-19
NOX3	LINC02889	0.419226	9.38722e-19
NOX4	MIR4435-2HG	0.349941	3.61667e-13
NOX4	PELATON	0.397456	7.44457e-17
NOX4	CYTOR	0.341785	1.35429e-12
NOX4	LINC01614	0.643479	5.98866e-49
NOX5	AC125807.2	0.466748	2.06988e-23
DUOX1	AC103563.7	0.807465	7.24837e-95
DUOX1	C5orf66-AS1	0.810235	5.23226e-96
DUOX1	LINC02560	0.845671	1.68772e-112
DUOX1	LINC02487	0.7617	2.42222e-78
DUOX1	AC104695.2	0.417975	1.21745e-18
DUOX1	AL512274.1	0.753629	8.20586e-76
DUOX1	MIR205HG	0.831865	1.2851e-105
DUOX1	DSG1-AS1	0.740823	5.41422e-72
DUOX1	AC016888.1	0.314647	8.3642e-11
DUOX1	AP002761.4	0.807117	1.00466e-94
DUOX1	LINC01269	0.557941	1.12297e-34
DUOX1	AC103563.2	0.762834	1.04855e-78
DUOX1	AC004816.1	0.644437	3.90192e-49
DUOX1	AC005532.1	0.510495	2.16009e-28
G6PD	AC009237.14	0.310772	1.45805e-10
G6PD	NRAV	0.306907	2.51807e-10
PGD	AC103563.7	0.558781	8.50749e-35
PGD	LINC02106	-0.324997	1.82119e-11
PGD	AL357054.4	-0.323531	2.26811e-11
PGD	C5orf66-AS1	0.568456	3.28681e-36
PGD	AC011472.4	-0.329494	9.22093e-12
PGD	AC008808.2	-0.336395	3.17401e-12
PGD	AC011472.1	-0.339764	1.86742e-12
PGD	HAND2-AS1	-0.31039	1.5394e-10
PGD	AC002398.2	-0.315534	7.35612e-11
PGD	LINC02560	0.619187	1.9106e-44
PGD	MIR100HG	-0.330036	8.48788e-12
PGD	FENDRR	-0.334408	4.32658e-12
PGD	LINC02487	0.601178	2.36497e-41
PGD	LINC00641	-0.322442	2.66785e-11
PGD	AP003071.3	-0.343779	9.8411e-13
PGD	AL512274.1	0.532157	3.87696e-31
PGD	SERTAD4-AS1	-0.340208	1.74065e-12
PGD	CARMN	-0.305676	2.99143e-10
PGD	AP003071.4	-0.337462	2.68514e-12
PGD	MIR205HG	0.556854	1.60615e-34
PGD	DSG1-AS1	0.592866	5.44759e-40
PGD	AC016888.1	0.382024	1.36762e-15
PGD	AP002761.4	0.555387	2.59842e-34
PGD	LINC01269	0.455369	3.15042e-22
PGD	AP000892.4	-0.301978	4.99632e-10
PGD	AC103563.2	0.553951	4.15077e-34
PGD	AC004816.1	0.517596	2.85702e-29
PGD	AL603750.1	-0.333677	4.84634e-12
PGD	ACTA2-AS1	-0.314235	8.87579e-11
PGD	AC005532.1	0.419198	9.4427e-19
PGD	LINC00294	-0.319318	4.23423e-11
PIK3CA	ZNF667-AS1	0.426558	1.99999e-19
PIK3CA	EBLN3P	0.324345	2.0083e-11
PIK3CA	AC005261.5	0.388201	4.3442e-16
PIK3CA	AC005332.6	0.308514	2.00825e-10
FLT3	AC008808.2	0.302361	4.7392e-10
FLT3	PSMA3-AS1	0.331265	7.03082e-12
FLT3	AC084018.1	0.441602	7.42877e-21
FLT3	HLA-DQB1-AS1	0.46248	5.81635e-23
FLT3	PSMB8-AS1	0.400956	3.76497e-17
FLT3	COPDA1	0.304438	3.55503e-10
SCP2	TMEM220-AS1	0.370626	1.06575e-14
SCP2	AC115619.1	0.372053	8.27777e-15
SCP2	AL158206.1	0.373103	6.86801e-15
SCP2	HNF4A-AS1	0.364758	2.97282e-14
SCP2	AC106876.1	0.306975	2.49401e-10
SCP2	LINC02404	0.330402	8.02589e-12
SCP2	LINC01133	0.387884	4.61073e-16
SCP2	AP001372.2	0.309288	1.79994e-10
SCP2	AC008771.1	0.33052	7.88217e-12
SCP2	AL139246.3	0.334479	4.27912e-12
TP53	REPIN1-AS1	0.302136	4.88905e-10
ACSL4	EBLN3P	0.316663	6.24361e-11
ACSL4	AC073857.1	0.311379	1.33722e-10
LPCAT3	ZSCAN16-AS1	-0.310767	1.45913e-10
LPCAT3	AL357033.3	0.313819	9.425e-11
LPCAT3	GATA6-AS1	0.308047	2.14498e-10
NRAS	AP001107.5	-0.380618	1.76963e-15
NRAS	PGM5-AS1	-0.350904	3.0866e-13
NRAS	LINC02106	-0.395823	1.02033e-16
NRAS	NALT1	-0.389013	3.72975e-16
NRAS	AL357054.4	-0.320417	3.60109e-11
NRAS	AC011472.4	-0.382567	1.23759e-15
NRAS	AC008808.2	-0.354905	1.58875e-13
NRAS	PART1	-0.402372	2.85124e-17
NRAS	AC011472.1	-0.362329	4.51865e-14
NRAS	AC025280.1	-0.328716	1.0381e-11
NRAS	MIR1-1HG-AS1	-0.387898	4.59829e-16
NRAS	AC099850.3	0.407293	1.0735e-17
NRAS	HAND2-AS1	-0.36463	3.03962e-14
NRAS	AC002398.2	-0.397703	7.09613e-17
NRAS	AL031587.5	-0.339726	1.87866e-12
NRAS	THAP9-AS1	0.312034	1.21779e-10
NRAS	AC053503.3	-0.351502	2.7964e-13
NRAS	AF001548.1	-0.386973	5.46758e-16
NRAS	ZNF710-AS1	-0.353747	1.92726e-13
NRAS	MIR100HG	-0.349337	3.99348e-13
NRAS	FENDRR	-0.353079	2.15377e-13
NRAS	SNHG1	0.305141	3.22332e-10
NRAS	AC036108.3	-0.325971	1.5731e-11
NRAS	ZSCAN16-AS1	-0.325214	1.76291e-11
NRAS	AL391335.1	-0.357107	1.09795e-13
NRAS	AP003071.3	-0.404473	1.88264e-17
NRAS	SERTAD4-AS1	-0.374606	5.25146e-15
NRAS	EBLN3P	0.34565	7.27883e-13
NRAS	AC053503.5	-0.353298	2.07695e-13
NRAS	CNN3-DT	-0.301595	5.26707e-10
NRAS	CARMN	-0.364526	3.09467e-14
NRAS	AP003071.4	-0.386833	5.61228e-16
NRAS	MBNL1-AS1	-0.351015	3.03059e-13
NRAS	AP000892.4	-0.371084	9.82921e-15
NRAS	AL603750.1	-0.341492	1.41905e-12
NRAS	AC100810.1	-0.322847	2.51176e-11
NRAS	AF001548.2	-0.319524	4.10763e-11
NRAS	ACTA2-AS1	-0.332991	5.3894e-12
NRAS	AF001548.3	-0.332788	5.56119e-12
KRAS	AGAP2-AS1	0.311798	1.25954e-10
KRAS	AC024896.1	0.365264	2.72364e-14
KRAS	AP005233.2	0.324894	1.84964e-11
KRAS	LINC00941	0.309472	1.75383e-10
HRAS	FENDRR	-0.305914	2.89366e-10
HRAS	SNHG15	0.320333	3.64606e-11
HRAS	AC092718.3	0.328021	1.15387e-11
TF	LINC02575	0.457527	1.89478e-22
TFRC	LINC02106	-0.312228	1.18442e-10
TFRC	LINC01082	-0.333247	5.18008e-12
TFRC	AL357054.4	-0.308259	2.08187e-10
TFRC	AC011472.4	-0.315951	6.92401e-11
TFRC	AC008808.2	-0.356887	1.1394e-13
TFRC	PART1	-0.314951	8.00417e-11
TFRC	AC099850.3	0.382498	1.25342e-15
TFRC	AC002398.2	-0.307548	2.30099e-10
TFRC	AL031587.5	-0.328095	1.14095e-11
TFRC	TRIM52-AS1	-0.343031	1.10973e-12
TFRC	GIHCG	-0.30926	1.80726e-10
TFRC	AF001548.1	-0.300754	5.91159e-10
TFRC	MIR100HG	-0.331211	7.08984e-12
TFRC	FENDRR	-0.327639	1.22266e-11
TFRC	ZNF667-AS1	-0.312199	1.18933e-10
TFRC	AP003071.3	-0.327928	1.17021e-11
TFRC	SERTAD4-AS1	-0.332939	5.43269e-12
TFRC	EBLN3P	0.375149	4.76424e-15
TFRC	CNN3-DT	-0.316465	6.42589e-11
TFRC	AL365181.3	0.328871	1.01392e-11
TFRC	AP003071.4	-0.310248	1.57082e-10
TFRC	AP000892.4	-0.307647	2.26934e-10
TFRC	AC100810.1	-0.370529	1.0842e-14
TFR2	LINC02575	0.383695	1.00523e-15
SLC38A1	MIR1-1HG-AS1	0.301675	5.20904e-10
SLC38A1	HAND2-AS1	0.315846	7.03065e-11
SLC38A1	AL031587.5	0.309284	1.80109e-10
SLC38A1	LINC00641	0.363368	3.77962e-14
SLC38A1	AC073857.1	0.322358	2.70131e-11
SLC38A1	AC093297.2	0.303094	4.28293e-10
SLC38A1	AC007342.8	0.310338	1.55092e-10
SLC38A1	AL603750.1	0.311702	1.27694e-10
SLC38A1	AC005261.5	0.420354	7.41714e-19
SLC38A1	OTUD6B-AS1	0.307237	2.40385e-10
SLC38A1	LINC00294	0.326098	1.54336e-11
SLC38A1	AC115618.2	0.328297	1.10649e-11
SLC1A5	AC099850.3	0.382286	1.30348e-15
SLC1A5	SPATA13	0.652749	8.89102e-51
SLC1A5	AC026740.1	0.309821	1.66903e-10
SLC1A5	MAFG-DT	0.419571	8.73494e-19
SLC1A5	LINC00511	0.318518	4.7619e-11
GLS2	SNHG16	0.330363	8.07354e-12
GLS2	MNX1-AS1	0.344153	9.26767e-13
GLS2	AC007342.4	0.307615	2.27954e-10
GLS2	RNASEH1-AS1	0.320411	3.60473e-11
GLS2	GAS5	0.342582	1.1925e-12
GLS2	SNHG7	0.318197	4.99132e-11
GOT1	AC011472.4	-0.317184	5.78706e-11
GOT1	AC011472.1	-0.324624	1.92599e-11
GOT1	MIR100HG	-0.346806	6.03492e-13
GOT1	FENDRR	-0.347997	4.97123e-13
GOT1	LINC00641	-0.328736	1.03506e-11
GOT1	ZNF667-AS1	-0.324952	1.83349e-11
GOT1	NORAD	-0.300812	5.86416e-10
GOT1	AL391335.1	-0.315014	7.93103e-11
GOT1	AP003071.3	-0.33072	7.64444e-12
GOT1	SERTAD4-AS1	-0.302462	4.67392e-10
GOT1	CNN3-DT	-0.319575	4.07726e-11
GOT1	CARMN	-0.312317	1.16945e-10
GOT1	AP003071.4	-0.323752	2.1947e-11
GOT1	AP000892.4	-0.316691	6.21823e-11
GOT1	TYMSOS	0.380482	1.81413e-15
GOT1	AF001548.2	-0.302345	4.7499e-10
GOT1	ACTA2-AS1	-0.342986	1.11771e-12
GOT1	LINC00294	-0.364359	3.1852e-14
GOT1	AC015922.2	-0.346927	5.91782e-13
CARS1	LINC02106	-0.320537	3.53818e-11
CARS1	AC011472.4	-0.323566	2.25648e-11
CARS1	AC008808.2	-0.303198	4.222e-10
CARS1	PART1	-0.325454	1.70054e-11
CARS1	AC011472.1	-0.306024	2.84958e-10
CARS1	MIR1-1HG-AS1	-0.30606	2.83535e-10
CARS1	AC099850.3	0.356924	1.1323e-13
CARS1	HAND2-AS1	-0.301206	5.55623e-10
CARS1	AC090152.1	-0.319671	4.01972e-11
CARS1	MIR100HG	-0.318426	4.82609e-11
CARS1	TNFRSF10A-AS1	0.301707	5.18651e-10
CARS1	ZSCAN16-AS1	-0.343175	1.08432e-12
CARS1	AP003071.3	-0.31572	7.16055e-11
CARS1	SERTAD4-AS1	-0.328809	1.02361e-11
CARS1	AP003071.4	-0.305445	3.08957e-10
CARS1	ACTA2-AS1	-0.302339	4.75379e-10
ALOX5	PELATON	0.306974	2.49426e-10
KEAP1	AL390728.5	-0.30526	3.17026e-10
KEAP1	PSMA3-AS1	-0.322738	2.55276e-11
KEAP1	AC024060.2	-0.373922	5.93529e-15
KEAP1	REPIN1-AS1	0.309627	1.71561e-10
KEAP1	AL590666.2	0.351757	2.68133e-13
KEAP1	AL606489.1	0.32644	1.46571e-11
KEAP1	AC073046.1	0.380605	1.77377e-15
HMOX1	AC115619.1	0.441786	7.12861e-21
HMOX1	HNF4A-AS1	0.336231	3.25646e-12
HMOX1	PELATON	0.336184	3.28049e-12
HMOX1	AC016888.1	0.316828	6.09516e-11
ATG5	AC243964.4	0.348417	4.64175e-13
ATG5	PVT1	0.497765	7.22335e-27
ATG7	AL603750.1	-0.31816	5.01792e-11
ATG7	AC073896.4	-0.313903	9.31149e-11
NCOA4	TMEM220-AS1	0.354873	1.59739e-13
NCOA4	AC115619.1	0.44413	4.20316e-21
NCOA4	HNF4A-AS1	0.385297	7.47113e-16
NCOA4	AC092718.3	-0.305867	2.91261e-10
NCOA4	VPS9D1-AS1	-0.300564	6.06765e-10
NCOA4	AC015912.3	-0.324643	1.92075e-11
NCOA4	AC138305.3	-0.321412	3.1088e-11
NCOA4	AC073896.4	-0.307345	2.36772e-10
ALOX12	AC103563.7	0.842545	6.96734e-111
ALOX12	C5orf66-AS1	0.823906	6.28022e-102
ALOX12	LINC02560	0.869107	6.91475e-126
ALOX12	LINC02487	0.9065	9.50336e-154
ALOX12	AC104695.2	0.417019	1.48403e-18
ALOX12	AL512274.1	0.768351	1.6685e-80
ALOX12	MIR205HG	0.715179	5.50895e-65
ALOX12	DSG1-AS1	0.809998	6.56792e-96
ALOX12	AP002761.4	0.722928	5.09436e-67
ALOX12	LINC01269	0.600299	3.30953e-41
ALOX12	AC103563.2	0.70637	9.38001e-63
ALOX12	AC004816.1	0.755781	1.77556e-76
ALOX12	AC005532.1	0.653766	5.55201e-51
ALOX12B	LINC02560	0.318166	5.01343e-11
ALOX15	DLEU2	0.635724	1.81626e-47
ALOX15	LINC00265	0.33845	2.29841e-12
ALOX15	AC007342.8	0.337998	2.46818e-12
ALOX15	AC025575.2	0.340576	1.64193e-12
ALOX15B	AC103563.7	0.741778	2.86062e-72
ALOX15B	C5orf66-AS1	0.79085	2.16903e-88
ALOX15B	LINC02560	0.811511	1.53726e-96
ALOX15B	LINC02487	0.709063	1.99113e-63
ALOX15B	AC104695.2	0.341069	1.51793e-12
ALOX15B	AL512274.1	0.589734	1.73513e-39
ALOX15B	MIR205HG	0.802148	9.98891e-93
ALOX15B	DSG1-AS1	0.771186	1.89951e-81
ALOX15B	AP002761.4	0.738204	3.06842e-71
ALOX15B	LINC01269	0.453249	5.17429e-22
ALOX15B	AC103563.2	0.628866	3.42365e-46
ALOX15B	AC004816.1	0.534397	1.96332e-31
ALOX15B	AC005532.1	0.501837	2.38841e-27
PHKG2	AC008808.2	-0.301161	5.59028e-10
PHKG2	MIR1-1HG-AS1	-0.300844	5.83889e-10
PHKG2	AC012073.1	0.351393	2.8475e-13
PHKG2	AL031587.5	-0.326209	1.51769e-11
PHKG2	FOXD2-AS1	0.37517	4.74619e-15
PHKG2	AC074117.1	0.320982	3.3127e-11
PHKG2	AF001548.1	-0.304827	3.36749e-10
PHKG2	MIR100HG	-0.343156	1.08765e-12
PHKG2	FENDRR	-0.341143	1.50015e-12
PHKG2	AL022322.1	0.303578	4.00546e-10
PHKG2	AC092718.3	0.339892	1.83013e-12
PHKG2	AC010542.5	0.331298	6.99593e-12
PHKG2	TRPM2-AS	0.33175	6.52543e-12
PHKG2	MELTF-AS1	0.329775	8.83418e-12
PHKG2	U62317.1	0.335722	3.52593e-12
PHKG2	AP003071.3	-0.323302	2.34711e-11
PHKG2	AC018665.1	0.300541	6.08673e-10
PHKG2	SNHG11	0.357949	9.52569e-14
PHKG2	AP003071.4	-0.313069	1.04985e-10
PHKG2	AL390719.2	0.33302	5.36509e-12
PHKG2	MBNL1-AS1	-0.300766	5.90144e-10
PHKG2	AC130456.3	0.305601	3.02299e-10
PHKG2	AP000892.4	-0.305506	3.06347e-10
PHKG2	AC023043.3	0.323927	2.138e-11
PHKG2	LBX2-AS1	0.504805	1.056e-27
PHKG2	AL139287.1	0.328146	1.1322e-11
PHKG2	ASMTL-AS1	0.31763	5.42263e-11
PHKG2	MRPL20-AS1	0.383583	1.02636e-15
PHKG2	AL121832.2	0.304224	3.66232e-10
PHKG2	TMEM44-AS1	0.370838	1.02657e-14
PHKG2	AC015912.3	0.34242	1.22368e-12
PHKG2	SNHG30	0.333218	5.20327e-12
PHKG2	AC135050.6	0.436453	2.33602e-20
ULK1	AL031587.5	0.371084	9.82892e-15
ULK1	ZNF667-AS1	0.351138	2.96998e-13
ULK1	AC009065.5	-0.352564	2.34588e-13
ULK1	NORAD	0.340132	1.76173e-12
ULK1	AL355574.1	0.315857	7.01992e-11
ULK1	CNN3-DT	0.317588	5.45622e-11
ULK1	AC018665.1	0.325413	1.71089e-11
ULK1	AC009065.2	-0.311021	1.4072e-10
ULK1	LINC00294	0.309039	1.86451e-10
ULK1	NKILA	0.320682	3.46312e-11
ULK1	BAIAP2-DT	0.381909	1.39684e-15
ULK1	AC015922.2	0.391112	2.50925e-16
ATG3	AP001107.5	-0.300238	6.3441e-10
ATG3	NALT1	-0.312333	1.16673e-10
ATG3	AC011472.4	-0.306643	2.61296e-10
ATG3	PART1	-0.31506	7.87874e-11
ATG3	AC011472.1	-0.340115	1.76632e-12
ATG3	MIR1-1HG-AS1	-0.340099	1.77084e-12
ATG3	HAND2-AS1	-0.307069	2.46138e-10
ATG3	AC002398.2	-0.301072	5.65901e-10
ATG3	AL031587.5	-0.360774	5.89605e-14
ATG3	AC053503.3	-0.311252	1.36174e-10
ATG3	AF001548.1	-0.344364	8.95865e-13
ATG3	FENDRR	-0.344275	9.08776e-13
ATG3	AL391335.1	-0.350954	3.06131e-13
ATG3	AP003071.3	-0.345745	7.16782e-13
ATG3	AC053503.5	-0.300383	6.21982e-10
ATG3	CNN3-DT	-0.334644	4.17098e-12
ATG3	CARMN	-0.328656	1.0477e-11
ATG3	AP003071.4	-0.331461	6.82189e-12
ATG3	MBNL1-AS1	-0.302696	4.5253e-10
ATG3	AC083799.1	0.424533	3.07714e-19
ATG3	AP000892.4	-0.330654	7.72143e-12
ATG3	AL603750.1	-0.300174	6.40024e-10
ATG3	AF001548.2	-0.302443	4.68639e-10
ATG3	LINC00294	-0.3053	3.1528e-10
ATG4D	AC115619.1	0.305202	3.19624e-10
ATG4D	MIR100HG	-0.353662	1.95477e-13
ATG4D	AC005034.3	-0.307551	2.3002e-10
ATG4D	LINC00641	-0.328841	1.01858e-11
ATG4D	ZNF667-AS1	-0.303794	3.88738e-10
ATG4D	AP003071.3	-0.310084	1.60791e-10
ATG4D	LINC02404	0.332202	6.08691e-12
ATG4D	AP003071.4	-0.310499	1.51592e-10
ATG4D	AC016888.1	0.423718	3.65623e-19
ATG4D	ACTA2-AS1	-0.340138	1.75997e-12
ATG4D	AC073046.1	0.328452	1.08066e-11
BECN1	AC092718.3	-0.300601	6.03664e-10
BECN1	AC005261.3	-0.346752	6.08873e-13
BECN1	AL390728.5	-0.345775	7.13333e-13
BECN1	AC024060.2	-0.337158	2.81636e-12
BECN1	ZFAS1	-0.301716	5.17974e-10
BECN1	AC120053.1	-0.329642	9.01501e-12
BECN1	AL035461.2	-0.341498	1.4179e-12
BECN1	AL023284.4	-0.309602	1.72174e-10
BECN1	AC103691.1	-0.308963	1.88488e-10
BECN1	SNHG6	-0.405128	1.65317e-17
BECN1	AC090772.4	-0.385393	7.33863e-16
BECN1	AP003352.1	-0.392832	1.80986e-16
BECN1	AC138305.3	-0.444356	3.99338e-21
BECN1	AC073046.1	0.309374	1.77815e-10
BECN1	AC073896.4	-0.462081	6.4006e-23
MAP1LC3A	TRIM52-AS1	0.338128	2.41791e-12
MAP1LC3A	GIHCG	0.321351	3.13661e-11
MAP1LC3A	ZSCAN16-AS1	0.324873	1.85545e-11
MAP1LC3A	SERTAD4-AS1	0.313212	1.02846e-10
MAP1LC3A	AC100810.1	0.404781	1.77097e-17
MAP1LC3A	LINC00294	0.318925	4.48606e-11
GABARAPL2	TRIM52-AS1	0.372972	7.03061e-15
GABARAPL2	ZSCAN16-AS1	0.300961	5.74555e-10
GABARAPL1	AP001107.5	0.608581	1.3381e-42
GABARAPL1	MIR22HG	0.350327	3.39425e-13
GABARAPL1	PGM5-AS1	0.493042	2.55984e-26
GABARAPL1	AP001065.3	0.46685	2.01873e-23
GABARAPL1	LINC02106	0.540634	2.87569e-32
GABARAPL1	LINC01082	0.319871	3.90317e-11
GABARAPL1	NALT1	0.533702	2.42594e-31
GABARAPL1	AL357054.4	0.485215	1.996e-25
GABARAPL1	AC011472.4	0.535293	1.49354e-31
GABARAPL1	AC008808.2	0.449738	1.16773e-21
GABARAPL1	PART1	0.517567	2.88107e-29
GABARAPL1	AC011472.1	0.501287	2.77555e-27
GABARAPL1	AC025280.1	0.540438	3.05657e-32
GABARAPL1	MIR1-1HG-AS1	0.518575	2.15346e-29
GABARAPL1	AC099850.3	-0.355116	1.53368e-13
GABARAPL1	HAND2-AS1	0.527258	1.68576e-30
GABARAPL1	AC002398.2	0.586394	5.88696e-39
GABARAPL1	AL162231.2	0.451488	7.79165e-22
GABARAPL1	RGS5	0.476362	1.91356e-24
GABARAPL1	AL031587.5	0.432049	6.12787e-20
GABARAPL1	TRIM52-AS1	0.368661	1.50606e-14
GABARAPL1	AC090152.1	0.436269	2.43263e-20
GABARAPL1	FOXD2-AS1	-0.303182	4.23131e-10
GABARAPL1	GIHCG	0.557913	1.1332e-34
GABARAPL1	AC053503.3	0.532241	3.77917e-31
GABARAPL1	AF001548.1	0.485512	1.84832e-25
GABARAPL1	ZNF710-AS1	0.374419	5.43036e-15
GABARAPL1	MIR100HG	0.631614	1.06473e-46
GABARAPL1	FENDRR	0.589889	1.63901e-39
GABARAPL1	AC092718.3	-0.320267	3.68171e-11
GABARAPL1	LINC00641	0.473592	3.82969e-24
GABARAPL1	ZNF667-AS1	0.586455	5.75708e-39
GABARAPL1	AC036108.3	0.418623	1.06419e-18
GABARAPL1	AC104695.2	0.318376	4.86213e-11
GABARAPL1	ZSCAN16-AS1	0.442563	5.98554e-21
GABARAPL1	AL391335.1	0.386025	6.52503e-16
GABARAPL1	AP003071.3	0.538292	5.94449e-32
GABARAPL1	SERTAD4-AS1	0.611315	4.54492e-43
GABARAPL1	AC053503.5	0.514825	6.32774e-29
GABARAPL1	CNN3-DT	0.482796	3.72649e-25
GABARAPL1	AL365181.3	-0.301939	5.02296e-10
GABARAPL1	REPIN1-AS1	-0.325837	1.60513e-11
GABARAPL1	CARMN	0.45323	5.19739e-22
GABARAPL1	AP003071.4	0.538049	6.40733e-32
GABARAPL1	MBNL1-AS1	0.469852	9.6747e-24
GABARAPL1	AP000892.4	0.52347	5.16867e-30
GABARAPL1	AL603750.1	0.399891	4.63718e-17
GABARAPL1	AL024508.1	-0.320671	3.4688e-11
GABARAPL1	AF001548.2	0.417781	1.26743e-18
GABARAPL1	ACTA2-AS1	0.523278	5.46977e-30
GABARAPL1	AL606489.1	-0.342656	1.17837e-12
GABARAPL1	AL049555.1	-0.37835	2.67443e-15
GABARAPL1	LINC00294	0.421921	5.34136e-19
GABARAPL1	AF001548.3	0.414488	2.49913e-18
GABARAPL1	AC015922.2	0.408401	8.59676e-18
ATG16L1	AC099850.3	0.353124	2.13788e-13
ATG16L1	TRIM52-AS1	-0.327069	1.33278e-11
ATG16L1	AC090152.1	-0.315374	7.52902e-11
ATG16L1	GIHCG	-0.304144	3.70289e-10
ATG16L1	TNFRSF10A-AS1	0.301936	5.02498e-10
ATG16L1	SPATA13	0.430442	8.68201e-20
ATG16L1	AC100810.1	-0.326391	1.47654e-11
WIPI2	AC012073.1	0.379279	2.25891e-15
WIPI2	AC074117.1	0.422313	4.91813e-19
WIPI2	SNHG15	0.30211	4.90633e-10
WIPI2	NORAD	0.369991	1.19206e-14
WIPI2	AL355574.1	0.350136	3.50234e-13
WIPI2	SNHG11	0.380431	1.83097e-15
WIPI2	SNHG17	0.309424	1.76574e-10
WIPI2	AC092171.2	0.46423	3.81399e-23
WIPI2	AC009237.14	0.343427	1.04149e-12
WIPI2	LBX2-AS1	0.397601	7.23887e-17
WIPI2	PANK2-AS1	0.41008	6.12964e-18
WIPI2	LINC00265	0.308319	2.06427e-10
WIPI2	MRPL20-AS1	0.318303	4.91424e-11
WIPI2	MAFG-DT	0.319758	3.96846e-11
WIPI2	LINC02575	0.323814	2.17421e-11
WIPI2	AL354892.2	0.306564	2.64221e-10
WIPI2	AC073046.1	0.375111	4.79745e-15
SNX4	AP001107.5	-0.312556	1.12994e-10
SNX4	LINC02106	-0.322456	2.66252e-11
SNX4	NALT1	-0.312521	1.13574e-10
SNX4	AL357054.4	-0.304352	3.59769e-10
SNX4	AC008808.2	-0.319896	3.88914e-11
SNX4	PART1	-0.315228	7.68949e-11
SNX4	MIR1-1HG-AS1	-0.333084	5.31192e-12
SNX4	AC099850.3	0.308284	2.07457e-10
SNX4	HAND2-AS1	-0.303122	4.26656e-10
SNX4	AC002398.2	-0.327033	1.34005e-11
SNX4	AL031587.5	-0.343425	1.04178e-12
SNX4	AC053503.3	-0.315076	7.86131e-11
SNX4	AF001548.1	-0.332921	5.44793e-12
SNX4	ZNF710-AS1	-0.317548	5.4877e-11
SNX4	MIR100HG	-0.336174	3.28547e-12
SNX4	FENDRR	-0.304728	3.41407e-10
SNX4	AL022322.1	0.31318	1.03327e-10
SNX4	AP003071.3	-0.365035	2.83365e-14
SNX4	AC090181.2	0.366662	2.13603e-14
SNX4	SERTAD4-AS1	-0.334589	4.20664e-12
SNX4	AC053503.5	-0.302395	4.71714e-10
SNX4	CARMN	-0.31246	1.14561e-10
SNX4	AP003071.4	-0.34589	7.00204e-13
SNX4	MBNL1-AS1	-0.313266	1.02049e-10
SNX4	AC083799.1	0.4119	4.23886e-18
SNX4	AP000892.4	-0.339905	1.82619e-12
SNX4	AF001548.2	-0.339893	1.8297e-12
SNX4	ACTA2-AS1	-0.313251	1.02269e-10
SNX4	TMEM44-AS1	0.318951	4.46847e-11
ATG13	ZSCAN16-AS1	-0.332367	5.93456e-12
ATG13	AL357033.3	0.32916	9.70288e-12
ATG13	LINC00857	0.314652	8.35812e-11
ATG13	AC073046.1	0.305154	3.21772e-10
ULK2	AP001107.5	0.502102	2.22125e-27
ULK2	PGM5-AS1	0.479411	8.85006e-25
ULK2	AP001065.3	0.40401	2.06355e-17
ULK2	LINC02106	0.495959	1.1745e-26
ULK2	NALT1	0.533137	2.88079e-31
ULK2	AL357054.4	0.501429	2.67039e-27
ULK2	AC011472.4	0.478504	1.11408e-24
ULK2	AC008808.2	0.422948	4.30191e-19
ULK2	PART1	0.483063	3.47895e-25
ULK2	AC011472.1	0.521571	9.01691e-30
ULK2	AC025280.1	0.402002	3.0662e-17
ULK2	MIR1-1HG-AS1	0.587121	4.51755e-39
ULK2	HAND2-AS1	0.544748	7.92283e-33
ULK2	AC002398.2	0.515295	5.53225e-29
ULK2	AL162231.2	0.430395	8.77067e-20
ULK2	RGS5	0.436988	2.0758e-20
ULK2	AL031587.5	0.492297	3.11964e-26
ULK2	AC090152.1	0.35232	2.44253e-13
ULK2	GIHCG	0.395798	1.02524e-16
ULK2	AC053503.3	0.566897	5.59332e-36
ULK2	AF001548.1	0.585658	7.68816e-39
ULK2	ZNF710-AS1	0.464611	3.47873e-23
ULK2	MIR100HG	0.599517	4.45935e-41
ULK2	FENDRR	0.582511	2.39286e-38
ULK2	AC092718.3	-0.41295	3.42247e-18
ULK2	LINC00641	0.59095	1.10814e-39
ULK2	ZNF667-AS1	0.459453	1.19957e-22
ULK2	AC036108.3	0.50021	3.72313e-27
ULK2	ZSCAN16-AS1	0.361089	5.58734e-14
ULK2	AL391335.1	0.550049	1.46574e-33
ULK2	AP003071.3	0.591006	1.08529e-39
ULK2	SERTAD4-AS1	0.48224	4.29839e-25
ULK2	AC053503.5	0.498819	5.4318e-27
ULK2	CNN3-DT	0.505777	8.07076e-28
ULK2	AC106876.1	-0.304136	3.70712e-10
ULK2	CARMN	0.555172	2.78768e-34
ULK2	AP003071.4	0.591097	1.04974e-39
ULK2	MBNL1-AS1	0.554956	2.99076e-34
ULK2	ELF3-AS1	-0.310367	1.54464e-10
ULK2	AP000892.4	0.567885	3.99415e-36
ULK2	AL603750.1	0.43198	6.22037e-20
ULK2	AF001548.2	0.520294	1.30815e-29
ULK2	ACTA2-AS1	0.591118	1.0415e-39
ULK2	AC015912.3	-0.305649	3.00273e-10
ULK2	LINC00294	0.520094	1.38667e-29
ULK2	AC115618.2	0.361999	4.7813e-14
ULK2	AC005332.6	0.353532	1.99742e-13
ULK2	AF001548.3	0.516445	3.97808e-29
ULK2	AC015922.2	0.352634	2.31889e-13
SAT1	AL391335.1	-0.301015	5.70355e-10
SAT1	AC083799.1	0.313418	9.98457e-11
SAT1	MIR222HG	0.313928	9.27766e-11
EGFR	PVT1	0.314452	8.60227e-11
MAPK3	TMEM220-AS1	0.310459	1.52453e-10
MAPK3	AC115619.1	0.341923	1.32481e-12
MAPK3	LINC00365	0.32394	2.13371e-11
MAPK3	AL355488.1	-0.356086	1.30348e-13
MAPK3	SNHG4	-0.304252	3.64777e-10
MAPK3	AC005034.3	-0.395523	1.08101e-16
MAPK3	HCG18	-0.32539	1.71693e-11
MAPK3	HNF4A-AS1	0.325534	1.68001e-11
MAPK3	AC015849.3	-0.301528	5.31523e-10
MAPK3	AC005261.3	-0.340029	1.79057e-12
MAPK3	AL390728.5	-0.329257	9.55999e-12
MAPK3	PSMA3-AS1	-0.437516	1.84678e-20
MAPK3	AC024060.2	-0.335631	3.57661e-12
MAPK3	EBLN3P	-0.322717	2.56096e-11
MAPK3	AL049840.5	-0.329356	9.41763e-12
MAPK3	AC073857.1	-0.393731	1.52444e-16
MAPK3	AC106876.1	0.336389	3.17706e-12
MAPK3	LINC02404	0.438536	1.47315e-20
MAPK3	AC005261.1	-0.41169	4.42342e-18
MAPK3	UBR5-AS1	-0.348251	4.76958e-13
MAPK3	AC093297.2	-0.356083	1.30416e-13
MAPK3	AC127024.5	-0.34016	1.75386e-12
MAPK3	AC016888.1	0.524927	3.36458e-30
MAPK3	AC018645.3	-0.331007	7.31477e-12
MAPK3	JPX	-0.319086	4.38102e-11
MAPK3	AC005261.5	-0.347635	5.27345e-13
MAPK1	AC106876.1	-0.304537	3.50612e-10
MAPK1	AC005261.5	0.367036	2.0013e-14
MAPK1	AC138305.3	-0.354244	1.77415e-13
MAPK1	AC005332.6	0.322952	2.47286e-11
MAPK1	AC073896.4	-0.311183	1.3752e-10
BID	AP001107.5	-0.381577	1.48448e-15
BID	MIR22HG	-0.325051	1.80667e-11
BID	PGM5-AS1	-0.344338	8.99543e-13
BID	AC103563.7	-0.303794	3.88757e-10
BID	AP001065.3	-0.326349	1.48592e-11
BID	LINC02106	-0.36542	2.65093e-14
BID	LINC01082	-0.302156	4.87553e-10
BID	NALT1	-0.360251	6.4459e-14
BID	AL357054.4	-0.369684	1.25843e-14
BID	AC011472.4	-0.377558	3.08729e-15
BID	AC008808.2	-0.338863	2.15338e-12
BID	PART1	-0.376524	3.72051e-15
BID	AC011472.1	-0.407713	9.86967e-18
BID	AC025280.1	-0.326376	1.47985e-11
BID	MIR4435-2HG	0.346421	6.42446e-13
BID	MIR1-1HG-AS1	-0.395601	1.0649e-16
BID	AC099850.3	0.419993	7.9989e-19
BID	HAND2-AS1	-0.364472	3.12365e-14
BID	AC002398.2	-0.384464	8.71984e-16
BID	RGS5	-0.337725	2.57639e-12
BID	AL031587.5	-0.35557	1.42138e-13
BID	AC090152.1	-0.382753	1.19596e-15
BID	FOXD2-AS1	0.314411	8.65412e-11
BID	AC053503.3	-0.374676	5.18637e-15
BID	AF001548.1	-0.397702	7.09797e-17
BID	ZNF710-AS1	-0.356723	1.1713e-13
BID	MIR100HG	-0.400093	4.45798e-17
BID	FENDRR	-0.439698	1.13734e-20
BID	AC092718.3	0.345214	7.80997e-13
BID	LINC00641	-0.402827	2.60682e-17
BID	ZNF667-AS1	-0.333223	5.19924e-12
BID	AC036108.3	-0.335685	3.54648e-12
BID	CYTOR	0.317891	5.21932e-11
BID	AL391335.1	-0.357313	1.06045e-13
BID	AP003071.3	-0.399332	5.17088e-17
BID	SERTAD4-AS1	-0.365378	2.67024e-14
BID	AC053503.5	-0.348324	4.71296e-13
BID	CARMN	-0.375048	4.85176e-15
BID	AP003071.4	-0.389774	3.23167e-16
BID	AC010789.1	0.336076	3.33626e-12
BID	AC068580.1	0.314261	8.84322e-11
BID	MBNL1-AS1	-0.366155	2.33313e-14
BID	AC009005.1	0.309582	1.72673e-10
BID	AP000892.4	-0.375636	4.36581e-15
BID	MRPL20-AS1	0.323181	2.38997e-11
BID	AL603750.1	-0.300911	5.78555e-10
BID	AF001548.2	-0.380293	1.878e-15
BID	ACTA2-AS1	-0.392961	1.76585e-16
BID	NRAV	0.411927	4.21549e-18
BID	LINC00294	-0.360565	6.10939e-14
BID	AL391056.1	0.366951	2.0311e-14
BID	AF001548.3	-0.34147	1.42412e-12
ZEB1	AP001107.5	0.781915	3.80448e-85
ZEB1	PGM5-AS1	0.757448	5.36502e-77
ZEB1	AP001065.3	0.574136	4.62603e-37
ZEB1	LINC02106	0.765899	1.06611e-79
ZEB1	LINC01082	0.322833	2.51694e-11
ZEB1	NALT1	0.811231	2.013e-96
ZEB1	AL357054.4	0.749124	1.92363e-74
ZEB1	AC011472.4	0.772738	5.70717e-82
ZEB1	AC008808.2	0.642655	8.64784e-49
ZEB1	PART1	0.788381	1.77279e-87
ZEB1	AC011472.1	0.73023	5.31729e-69
ZEB1	AC025280.1	0.672136	8.12152e-55
ZEB1	MIR1-1HG-AS1	0.822333	3.19636e-101
ZEB1	AC099850.3	-0.372521	7.61861e-15
ZEB1	HAND2-AS1	0.860922	6.20355e-121
ZEB1	AC002398.2	0.857644	4.86989e-119
ZEB1	AL162231.2	0.51749	2.94533e-29
ZEB1	RGS5	0.664909	2.82397e-53
ZEB1	AL031587.5	0.639785	3.0793e-48
ZEB1	TRIM52-AS1	0.302697	4.5248e-10
ZEB1	AC090152.1	0.499761	4.20697e-27
ZEB1	GIHCG	0.598152	7.48809e-41
ZEB1	AC053503.3	0.856238	3.06171e-118
ZEB1	AF001548.1	0.86965	3.16067e-126
ZEB1	ZNF710-AS1	0.702957	6.52451e-62
ZEB1	MIR100HG	0.899235	1.68417e-147
ZEB1	FENDRR	0.905183	1.40571e-152
ZEB1	SNHG15	-0.339315	2.00498e-12
ZEB1	SNHG1	-0.309939	1.64141e-10
ZEB1	AC092718.3	-0.330386	8.04531e-12
ZEB1	LINC00641	0.738687	2.23083e-71
ZEB1	ZNF667-AS1	0.652953	8.09317e-51
ZEB1	AC036108.3	0.796855	1.16315e-90
ZEB1	AC104695.2	0.303088	4.28638e-10
ZEB1	ZSCAN16-AS1	0.545538	6.17385e-33
ZEB1	AL391335.1	0.746443	1.21806e-73
ZEB1	AP003071.3	0.88157	4.15918e-134
ZEB1	SERTAD4-AS1	0.82907	2.66862e-104
ZEB1	AC053503.5	0.808243	3.47749e-95
ZEB1	CNN3-DT	0.721412	1.2891e-66
ZEB1	CARMN	0.791794	9.64734e-89
ZEB1	MNX1-AS1	-0.318088	5.07153e-11
ZEB1	AP003071.4	0.876732	8.23534e-131
ZEB1	AC016888.1	-0.315686	7.1954e-11
ZEB1	MBNL1-AS1	0.867316	8.94438e-125
ZEB1	ELF3-AS1	-0.356496	1.21683e-13
ZEB1	AP000892.4	0.841873	1.53548e-110
ZEB1	TYMSOS	-0.306374	2.71317e-10
ZEB1	MRPL20-AS1	-0.309549	1.73468e-10
ZEB1	AL603750.1	0.782067	3.36112e-85
ZEB1	AF001548.2	0.706787	7.38891e-63
ZEB1	ACTA2-AS1	0.845926	1.24065e-112
ZEB1	AP001972.5	0.387932	4.56921e-16
ZEB1	AL606489.1	-0.336368	3.18751e-12
ZEB1	AL049555.1	-0.31742	5.59165e-11
ZEB1	LINC00294	0.72516	1.28264e-67
ZEB1	AC073046.1	-0.301523	5.31926e-10
ZEB1	AF001548.3	0.759134	1.58323e-77
ZEB1	AC015922.2	0.392247	2.02316e-16
DPP4	AC115619.1	0.565617	8.63391e-36
DPP4	HNF4A-AS1	0.627024	7.44345e-46
DPP4	LINC02404	0.347673	5.24107e-13
DPP4	AC016888.1	0.40777	9.75671e-18
DPP4	AC124067.4	0.333256	5.17258e-12
CDKN2A	AC099850.3	0.332317	5.97992e-12
CDKN2A	AC012073.1	0.372445	7.72215e-15
CDKN2A	AC074117.1	0.346849	5.99332e-13
CDKN2A	AC092718.3	0.396907	8.27855e-17
CDKN2A	TRPM2-AS	0.321532	3.05393e-11
CDKN2A	AL355574.1	0.377699	3.00931e-15
CDKN2A	AC127024.5	0.345063	8.00385e-13
CDKN2A	AC010789.1	0.325575	1.66987e-11
CDKN2A	AC103702.2	0.30146	5.36516e-10
CDKN2A	ELF3-AS1	0.322166	2.77978e-11
CDKN2A	AL035461.2	0.305102	3.24095e-10
CDKN2A	LBX2-AS1	0.377127	3.33704e-15
CDKN2A	PANK2-AS1	0.400309	4.27355e-17
CDKN2A	RAB30-DT	0.427415	1.66521e-19
CDKN2A	AL139287.1	0.384142	9.25517e-16
CDKN2A	AC026740.1	0.358417	8.80083e-14
CDKN2A	AL445524.1	0.33945	1.9626e-12
CDKN2A	SNHG30	0.373098	6.87465e-15
CDKN2A	DSCR8	0.338556	2.26025e-12
PEBP1	AC115619.1	0.627468	6.17437e-46
PEBP1	HNF4A-AS1	0.528295	1.23772e-30
PEBP1	LINC02404	0.40143	3.43142e-17
CDO1	AP001107.5	0.40454	1.85792e-17
CDO1	LINC02106	0.397711	7.08571e-17
CDO1	NALT1	0.360478	6.20061e-14
CDO1	AL357054.4	0.378178	2.75926e-15
CDO1	AC011472.4	0.357008	1.11644e-13
CDO1	AC008808.2	0.436069	2.54233e-20
CDO1	PART1	0.396993	8.14267e-17
CDO1	AC011472.1	0.369496	1.30069e-14
CDO1	AC025280.1	0.345772	7.13698e-13
CDO1	MIR1-1HG-AS1	0.396561	8.85057e-17
CDO1	AC099850.3	-0.340654	1.62168e-12
CDO1	HAND2-AS1	0.368883	1.44869e-14
CDO1	AC002398.2	0.421484	5.85423e-19
CDO1	AL162231.2	0.372795	7.25595e-15
CDO1	RGS5	0.395269	1.13512e-16
CDO1	TRIM52-AS1	0.313364	1.0062e-10
CDO1	AC090152.1	0.322067	2.82084e-11
CDO1	GIHCG	0.43262	5.41127e-20
CDO1	AC053503.3	0.37285	7.18513e-15
CDO1	AF001548.1	0.379108	2.33029e-15
CDO1	MIR100HG	0.51219	1.33857e-28
CDO1	FENDRR	0.413691	2.94184e-18
CDO1	AC092718.3	-0.307506	2.31459e-10
CDO1	LINC00641	0.340006	1.79719e-12
CDO1	ZNF667-AS1	0.535852	1.25899e-31
CDO1	ZSCAN16-AS1	0.307263	2.39527e-10
CDO1	AL391335.1	0.353933	1.86859e-13
CDO1	AP003071.3	0.435858	2.66326e-20
CDO1	SERTAD4-AS1	0.380536	1.79646e-15
CDO1	AC053503.5	0.307103	2.44953e-10
CDO1	CNN3-DT	0.410795	5.30426e-18
CDO1	CARMN	0.408747	8.01839e-18
CDO1	AP003071.4	0.410318	5.84118e-18
CDO1	MBNL1-AS1	0.351204	2.93765e-13
CDO1	AP000892.4	0.401395	3.45497e-17
CDO1	ACTA2-AS1	0.410179	6.00776e-18
CDO1	LINC00294	0.328528	1.06819e-11
CDO1	AF001548.3	0.327254	1.29613e-11
MYB	MIR22HG	-0.337545	2.65023e-12
MYB	AC099850.3	0.316329	6.55486e-11
MYB	GIHCG	-0.322713	2.5626e-11
MYB	SNHG1	0.335173	3.84122e-12
MYB	MAPKAPK5-AS1	0.30546	3.08329e-10
MYB	ZNF667-AS1	-0.314766	8.22121e-11
MYB	SPATA13	0.390452	2.84358e-16
MYB	REPIN1-AS1	0.602665	1.33631e-41
MYB	FEZF1-AS1	0.328341	1.09911e-11
MYB	AC145207.5	0.369618	1.273e-14
MYB	AC009005.1	0.303837	3.86417e-10
MYB	AL023284.4	0.301003	5.71292e-10
MYB	HOXA11-AS	0.358589	8.54734e-14
MYB	AC004080.2	0.384006	9.49197e-16
MYB	HOXB-AS4	0.336385	3.17903e-12
MYB	HOTTIP	0.360798	5.87178e-14
MYB	AL049555.1	0.336704	3.02411e-12
MYB	AC015922.2	-0.346194	6.66542e-13
MAPK8	AC012073.1	0.34515	7.89214e-13
MAPK8	THAP9-AS1	0.368136	1.65123e-14
MAPK8	AL355488.1	0.352483	2.3776e-13
MAPK8	SNHG1	0.337152	2.81879e-12
MAPK8	HCG18	0.334179	4.4834e-12
MAPK8	MAPKAPK5-AS1	0.364049	3.36039e-14
MAPK8	EBLN3P	0.346562	6.27878e-13
MAPK8	AC073857.1	0.406655	1.21954e-17
MAPK8	AC008735.2	0.305603	3.02229e-10
MAPK8	AC005261.1	0.301706	5.18687e-10
MAPK8	AC093297.2	0.360838	5.83161e-14
MAPK8	DLEU2	0.333548	4.94387e-12
MAPK8	AC005261.5	0.339297	2.01087e-12
CHAC1	LINC00365	0.318681	4.64908e-11
CHAC1	C8orf31	0.311865	1.24759e-10
MAPK14	NORAD	0.354349	1.74341e-13
MAPK14	AC005332.6	0.302301	4.77902e-10
LINC00472	AP001107.5	0.381188	1.5943e-15
LINC00472	PGM5-AS1	0.340901	1.55921e-12
LINC00472	AP001065.3	0.349134	4.12822e-13
LINC00472	LINC02106	0.359426	7.4172e-14
LINC00472	NALT1	0.456982	2.15495e-22
LINC00472	AL357054.4	0.413728	2.91996e-18
LINC00472	AC011472.4	0.371744	8.74521e-15
LINC00472	AC008808.2	0.302384	4.72422e-10
LINC00472	PART1	0.330637	7.74231e-12
LINC00472	AC011472.1	0.438092	1.62571e-20
LINC00472	MIR1-1HG-AS1	0.435068	3.16806e-20
LINC00472	HAND2-AS1	0.4653	2.94341e-23
LINC00472	AC002398.2	0.310248	1.57082e-10
LINC00472	RGS5	0.352382	2.41761e-13
LINC00472	AL031587.5	0.333978	4.62521e-12
LINC00472	GIHCG	0.336337	3.20288e-12
LINC00472	AC053503.3	0.366019	2.38926e-14
LINC00472	AF001548.1	0.43336	4.60503e-20
LINC00472	ZNF710-AS1	0.322432	2.67169e-11
LINC00472	MIR100HG	0.390466	2.83594e-16
LINC00472	FENDRR	0.394707	1.26443e-16
LINC00472	LINC00641	0.435229	3.05816e-20
LINC00472	ZNF667-AS1	0.306345	2.72431e-10
LINC00472	AC036108.3	0.401036	3.70702e-17
LINC00472	AL391335.1	0.413632	2.97794e-18
LINC00472	AP003071.3	0.439087	1.30308e-20
LINC00472	SERTAD4-AS1	0.378138	2.7791e-15
LINC00472	AC053503.5	0.328977	9.97693e-12
LINC00472	CARMN	0.414973	2.26225e-18
LINC00472	AP003071.4	0.412392	3.83494e-18
LINC00472	MBNL1-AS1	0.387679	4.79158e-16
LINC00472	AP000892.4	0.362913	4.08727e-14
LINC00472	AL603750.1	0.365338	2.68864e-14
LINC00472	AF001548.2	0.449417	1.2574e-21
LINC00472	ACTA2-AS1	0.404609	1.83238e-17
LINC00472	LINC00294	0.458482	1.51101e-22
LINC00472	AF001548.3	0.379408	2.20677e-15
LINC00472	AC015922.2	0.321578	3.03297e-11
PRKAA2	AP001107.5	0.663575	5.37974e-53
PRKAA2	PGM5-AS1	0.646723	1.39535e-49
PRKAA2	AP001065.3	0.489815	6.00862e-26
PRKAA2	LINC02106	0.632087	8.70024e-47
PRKAA2	NALT1	0.727896	2.32333e-68
PRKAA2	AL357054.4	0.648492	6.26092e-50
PRKAA2	AC011472.4	0.670227	2.09425e-54
PRKAA2	AC008808.2	0.461123	8.05408e-23
PRKAA2	PART1	0.720227	2.65247e-66
PRKAA2	AC011472.1	0.668844	4.14109e-54
PRKAA2	AC025280.1	0.552052	7.68544e-34
PRKAA2	MIR1-1HG-AS1	0.777813	1.04447e-83
PRKAA2	HAND2-AS1	0.745483	2.34539e-73
PRKAA2	AC002398.2	0.667024	1.01e-53
PRKAA2	AL162231.2	0.420564	7.0986e-19
PRKAA2	RGS5	0.4633	4.77482e-23
PRKAA2	AL031587.5	0.601692	1.94213e-41
PRKAA2	AC090152.1	0.435489	2.88843e-20
PRKAA2	GIHCG	0.551803	8.32875e-34
PRKAA2	AC053503.3	0.713226	1.74924e-64
PRKAA2	AF001548.1	0.767553	3.05915e-80
PRKAA2	ZNF710-AS1	0.657151	1.14307e-51
PRKAA2	MIR100HG	0.669459	3.05892e-54
PRKAA2	FENDRR	0.709693	1.38125e-63
PRKAA2	LINC00641	0.675177	1.7702e-55
PRKAA2	ZNF667-AS1	0.587746	3.59613e-39
PRKAA2	AC036108.3	0.701548	1.44176e-61
PRKAA2	AC104695.2	0.351838	2.64547e-13
PRKAA2	ZSCAN16-AS1	0.47929	9.12568e-25
PRKAA2	AL391335.1	0.691356	3.8905e-59
PRKAA2	AP003071.3	0.727108	3.80817e-68
PRKAA2	SERTAD4-AS1	0.650326	2.71101e-50
PRKAA2	AC053503.5	0.687412	3.18861e-58
PRKAA2	CNN3-DT	0.651685	1.45234e-50
PRKAA2	CARMN	0.686613	4.86599e-58
PRKAA2	AP003071.4	0.71304	1.95288e-64
PRKAA2	AC009065.2	-0.315663	7.22008e-11
PRKAA2	MBNL1-AS1	0.719525	4.06219e-66
PRKAA2	AP000892.4	0.693807	1.03407e-59
PRKAA2	AL603750.1	0.67512	1.82195e-55
PRKAA2	AF001548.2	0.56793	3.93385e-36
PRKAA2	ACTA2-AS1	0.690158	7.3974e-59
PRKAA2	AP001972.5	0.334467	4.28713e-12
PRKAA2	LINC00294	0.616232	6.34367e-44
PRKAA2	AF001548.3	0.666298	1.43865e-53
PRKAA2	AC015922.2	0.419904	8.14951e-19
PRKAA1	AC006042.1	0.340985	1.53841e-12
PRKAA1	AC093297.2	0.344851	8.28226e-13
PRKAA1	NNT-AS1	0.3283	1.10589e-11
ELAVL1	MIR22HG	-0.391332	2.40676e-16
ELAVL1	TMEM220-AS1	-0.327864	1.1816e-11
ELAVL1	LINC01082	-0.30188	5.0645e-10
ELAVL1	AC099850.3	0.443692	4.64053e-21
ELAVL1	AC012073.1	0.31718	5.79069e-11
ELAVL1	SNHG15	0.305572	3.03535e-10
ELAVL1	SNHG1	0.339122	2.067e-12
ELAVL1	AC092718.3	0.301991	4.98758e-10
ELAVL1	SNHG16	0.422796	4.44262e-19
ELAVL1	SPATA13	0.319865	3.90674e-11
ELAVL1	AC073857.1	0.436512	2.30584e-20
ELAVL1	MNX1-AS1	0.346423	6.42193e-13
ELAVL1	AC005261.1	0.31529	7.6212e-11
ELAVL1	EMSLR	0.316951	5.98752e-11
ELAVL1	AC145207.5	0.448423	1.58008e-21
ELAVL1	DLEU2	0.511509	1.62261e-28
ELAVL1	SNHG17	0.330872	7.46845e-12
ELAVL1	AC009005.1	0.355253	1.49885e-13
ELAVL1	AL035461.2	0.398494	6.08671e-17
ELAVL1	AC018645.3	0.322075	2.81732e-11
ELAVL1	AC007342.8	0.342595	1.18995e-12
ELAVL1	AC026401.3	0.31722	5.75654e-11
BAP1	AC012073.1	0.324443	1.97891e-11
BAP1	REPIN1-AS1	0.36632	2.26717e-14
BAP1	MRPL20-AS1	0.324691	1.9069e-11
BAP1	MAFG-DT	0.413508	3.05398e-18
BAP1	BAIAP2-DT	0.374184	5.66337e-15
BAP1	AC073046.1	0.363557	3.65838e-14
ACVR1B	AC099850.3	0.301827	5.10126e-10
ACVR1B	AC012073.1	0.428612	1.28816e-19
ACVR1B	FOXD2-AS1	0.361801	4.94604e-14
ACVR1B	AC074117.1	0.424805	2.90451e-19
ACVR1B	MIR100HG	-0.318785	4.57904e-11
ACVR1B	ZSCAN16-AS1	-0.301894	5.05411e-10
ACVR1B	AP003071.3	-0.307166	2.42809e-10
ACVR1B	AC114488.1	0.322195	2.76776e-11
ACVR1B	SNHG11	0.459735	1.1217e-22
ACVR1B	AP003071.4	-0.300538	6.08871e-10
ACVR1B	HNF1A-AS1	0.35857	8.57472e-14
ACVR1B	AL357033.3	0.340397	1.68927e-12
ACVR1B	ELF3-AS1	0.310367	1.54452e-10
ACVR1B	AC009237.14	0.343356	1.05337e-12
ACVR1B	LBX2-AS1	0.418417	1.11071e-18
ACVR1B	PANK2-AS1	0.313608	9.71546e-11
ACVR1B	MRPL20-AS1	0.377962	2.86915e-15
ACVR1B	AC124067.4	0.422017	5.23407e-19
ACVR1B	AF001548.2	-0.304947	3.31154e-10
ACVR1B	AL117382.1	0.302729	4.50494e-10
ACVR1B	AL606489.1	0.309615	1.71864e-10
ACVR1B	LINC02575	0.34367	1.00153e-12
ACVR1B	LINC00665	0.303378	4.11794e-10
ACVR1B	BAIAP2-DT	0.30711	2.4471e-10
ACVR1B	AC073046.1	0.348283	4.74491e-13
ACVR1B	DSCR8	0.398532	6.04192e-17
ACVR1B	AC091179.1	0.307798	2.22168e-10
TGFBR1	PART1	0.384548	8.58527e-16
TGFBR1	MIR1-1HG-AS1	0.352873	2.22864e-13
TGFBR1	HAND2-AS1	0.338073	2.439e-12
TGFBR1	AC002398.2	0.413258	3.21437e-18
TGFBR1	AL031587.5	0.330701	7.66706e-12
TGFBR1	AC053503.3	0.390231	2.96458e-16
TGFBR1	AF001548.1	0.380436	1.82959e-15
TGFBR1	ZNF710-AS1	0.309142	1.83776e-10
TGFBR1	MIR100HG	0.42197	5.28568e-19
TGFBR1	FENDRR	0.46594	2.51995e-23
TGFBR1	LINC00641	0.366749	2.10404e-14
TGFBR1	ZNF667-AS1	0.335013	3.93823e-12
TGFBR1	AC036108.3	0.359381	7.47305e-14
TGFBR1	AL391335.1	0.377052	3.38285e-15
TGFBR1	AP003071.3	0.432215	5.91109e-20
TGFBR1	SERTAD4-AS1	0.409964	6.27454e-18
TGFBR1	AC053503.5	0.465448	2.83946e-23
TGFBR1	CNN3-DT	0.436917	2.10826e-20
TGFBR1	CARMN	0.336982	2.89516e-12
TGFBR1	AP003071.4	0.427585	1.60553e-19
TGFBR1	MBNL1-AS1	0.459382	1.22009e-22
TGFBR1	AP000892.4	0.481896	4.69365e-25
TGFBR1	AL603750.1	0.361131	5.54667e-14
TGFBR1	AF001548.2	0.322762	2.54402e-11
TGFBR1	ACTA2-AS1	0.407159	1.10269e-17
TGFBR1	LINC00294	0.407041	1.12892e-17
TGFBR1	AF001548.3	0.368127	1.65387e-14
EPAS1	RGS5	0.316153	6.72457e-11
EPAS1	SNHG15	-0.343071	1.10262e-12
EPAS1	SNHG1	-0.325247	1.75408e-11
EPAS1	AC092718.3	-0.343639	1.00662e-12
EPAS1	ZFAS1	-0.307405	2.34789e-10
EPAS1	TYMSOS	-0.32609	1.5452e-11
EPAS1	SNHG6	-0.303997	3.77942e-10
EPAS1	AC015922.2	0.34606	6.81155e-13
HILPDA	AC103563.7	0.329756	8.85865e-12
HILPDA	C5orf66-AS1	0.378717	2.502e-15
HILPDA	LINC02560	0.393911	1.47273e-16
HILPDA	LINC02487	0.415783	1.91541e-18
HILPDA	AL512274.1	0.307636	2.27281e-10
HILPDA	DSG1-AS1	0.350614	3.23789e-13
HILPDA	AP002761.4	0.348187	4.81956e-13
HILPDA	AC004816.1	0.348848	4.32656e-13
IFNG	U62317.1	0.382999	1.14307e-15
IFNG	HLA-DQB1-AS1	0.379785	2.06018e-15
IFNG	AC008760.2	0.304563	3.49377e-10
ANO6	AP001107.5	0.344765	8.39706e-13
ANO6	PGM5-AS1	0.323216	2.3775e-11
ANO6	LINC02106	0.325777	1.61979e-11
ANO6	NALT1	0.378916	2.41324e-15
ANO6	AL357054.4	0.371689	8.83119e-15
ANO6	PART1	0.327362	1.27507e-11
ANO6	AC011472.1	0.323332	2.33659e-11
ANO6	MIR1-1HG-AS1	0.417928	1.22934e-18
ANO6	HAND2-AS1	0.42832	1.37162e-19
ANO6	AC002398.2	0.358104	9.27893e-14
ANO6	RGS5	0.310426	1.53175e-10
ANO6	AL031587.5	0.367213	1.94044e-14
ANO6	AC053503.3	0.430297	8.95877e-20
ANO6	AF001548.1	0.435881	2.64987e-20
ANO6	ZNF710-AS1	0.32264	2.5906e-11
ANO6	MIR100HG	0.451801	7.24695e-22
ANO6	FENDRR	0.418861	1.01272e-18
ANO6	AC005034.3	0.316229	6.65042e-11
ANO6	LINC00641	0.426186	2.16532e-19
ANO6	ZNF667-AS1	0.310415	1.53406e-10
ANO6	AC036108.3	0.406824	1.17897e-17
ANO6	AL391335.1	0.377423	3.16358e-15
ANO6	AP003071.3	0.425036	2.76544e-19
ANO6	AC053503.5	0.370485	1.09271e-14
ANO6	CNN3-DT	0.374914	4.9693e-15
ANO6	CARMN	0.39956	4.94605e-17
ANO6	AP003071.4	0.434665	3.46105e-20
ANO6	AL390719.2	-0.303909	3.82562e-10
ANO6	MBNL1-AS1	0.44327	5.10393e-21
ANO6	ELF3-AS1	-0.330499	7.90783e-12
ANO6	AP000892.4	0.423775	3.61247e-19
ANO6	LBX2-AS1	-0.322154	2.78439e-11
ANO6	LINC01133	-0.306523	2.6574e-10
ANO6	AL603750.1	0.37245	7.71533e-15
ANO6	AL355353.1	-0.348949	4.25532e-13
ANO6	AC005261.5	0.35305	2.16423e-13
ANO6	AF001548.2	0.332872	5.48921e-12
ANO6	ACTA2-AS1	0.441938	6.88979e-21
ANO6	AL445524.1	-0.305398	3.10975e-10
ANO6	AC015912.3	-0.394587	1.294e-16
ANO6	LINC00294	0.424806	2.90388e-19
ANO6	AC138305.3	-0.321543	3.04881e-11
ANO6	AF001548.3	0.354538	1.68926e-13
LPIN1	LINC02487	0.318589	4.71225e-11
LPIN1	AL512274.1	0.303836	3.86458e-10
HMGB1	MIR22HG	-0.397111	7.95884e-17
HMGB1	AC099850.3	0.372354	7.84689e-15
HMGB1	AC012073.1	0.327758	1.2007e-11
HMGB1	ANKRD10-IT1	0.317105	5.85428e-11
HMGB1	AC131009.3	0.351649	2.72963e-13
HMGB1	AC074117.1	0.32484	1.8647e-11
HMGB1	FENDRR	-0.330869	7.47133e-12
HMGB1	SNHG15	0.378822	2.45485e-15
HMGB1	SNHG1	0.407361	1.05904e-17
HMGB1	MAPKAPK5-AS1	0.301177	5.57792e-10
HMGB1	AC092718.3	0.409407	7.02142e-18
HMGB1	TRPM2-AS	0.332237	6.0545e-12
HMGB1	AL390728.5	0.405168	1.64017e-17
HMGB1	MNX1-AS1	0.370335	1.12188e-14
HMGB1	SNHG11	0.310156	1.59158e-10
HMGB1	UBR5-AS1	0.357377	1.04905e-13
HMGB1	AC145207.5	0.364213	3.26703e-14
HMGB1	AC124798.1	0.388333	4.23843e-16
HMGB1	DLEU2	0.477991	1.26846e-24
HMGB1	SNHG17	0.41086	5.23484e-18
HMGB1	AC103702.2	0.34291	1.13143e-12
HMGB1	AC009005.1	0.37115	9.7148e-15
HMGB1	ELF3-AS1	0.321127	3.24243e-11
HMGB1	AL035461.2	0.421777	5.5048e-19
HMGB1	AL023284.4	0.382973	1.1486e-15
HMGB1	TYMSOS	0.319008	4.43136e-11
HMGB1	MCF2L-AS1	0.390397	2.87324e-16
HMGB1	AC026740.1	0.346824	6.01728e-13
HMGB1	AL024508.1	0.357682	9.96486e-14
HMGB1	FOXP4-AS1	0.364004	3.3868e-14
HMGB1	AL117382.1	0.41753	1.33507e-18
HMGB1	SNHG6	0.3468	6.0407e-13
HMGB1	SNHG30	0.344275	9.08714e-13
HMGB1	AC138305.3	0.337739	2.57071e-12
HMGB1	AC073896.4	0.30731	2.3794e-10
TNFAIP3	HLA-DQB1-AS1	0.330863	7.47845e-12
TLR4	PELATON	0.320043	3.80562e-11
TLR4	SPATA13	0.310074	1.6102e-10
TLR4	AC138305.3	-0.320991	3.30859e-11
ATF3	AP001107.5	0.39986	4.6657e-17
ATF3	MIR22HG	0.422581	4.64856e-19
ATM	ANKRD10-IT1	0.346302	6.54918e-13
ATM	AL355488.1	0.333896	4.68474e-12
ATM	HCG18	0.365929	2.42688e-14
ATM	AC015849.3	0.364817	2.94276e-14
ATM	LINC00641	0.366863	2.06263e-14
ATM	PTOV1-AS2	0.486415	1.46209e-25
ATM	PSMA3-AS1	0.52968	8.17582e-31
ATM	EBLN3P	0.302296	4.78203e-10
ATM	AL049840.5	0.431504	6.8976e-20
ATM	LENG8-AS1	0.380427	1.83254e-15
ATM	AC006042.1	0.318878	4.51717e-11
ATM	AC073857.1	0.311467	1.32043e-10
ATM	AC008735.2	0.318656	4.66622e-11
ATM	AC018665.1	0.343979	9.53054e-13
ATM	AC005261.1	0.323233	2.37155e-11
ATM	LINC00174	0.323069	2.43007e-11
ATM	LINC00265	0.325182	1.7715e-11
ATM	AL662795.2	0.300666	5.98285e-10
ATM	AC005261.5	0.480737	6.31304e-25
ATM	AC084018.1	0.608928	1.16749e-42
ATM	HLA-DQB1-AS1	0.44316	5.23287e-21
ATM	AC005332.6	0.305135	3.22631e-10
ATM	PSMB8-AS1	0.333507	4.97582e-12
YY1AP1	AC012073.1	0.300215	6.36452e-10
YY1AP1	HCG18	0.317331	5.66424e-11
YY1AP1	AL928654.2	0.306254	2.75912e-10
YY1AP1	AL355574.1	0.328236	1.11668e-11
YY1AP1	AC018665.1	0.306888	2.52458e-10
EGLN2	AC012073.1	0.329283	9.52192e-12
EGLN2	AC131009.3	0.32094	3.33371e-11
EGLN2	AC074117.1	0.307317	2.37713e-10
EGLN2	AC092718.3	0.307087	2.45527e-10
EGLN2	AC015849.3	0.375214	4.70884e-15
EGLN2	AC005261.3	0.406244	1.3238e-17
EGLN2	PTOV1-AS2	0.408006	9.30493e-18
EGLN2	AL390728.5	0.336562	3.09194e-12
EGLN2	LENG8-AS1	0.412623	3.65845e-18
EGLN2	AC010326.3	0.457559	1.88035e-22
EGLN2	HM13-IT1	0.402573	2.74054e-17
EGLN2	SNHG11	0.321609	3.019e-11
EGLN2	HNF1A-AS1	0.328397	1.08975e-11
EGLN2	AC127024.5	0.337484	2.67579e-12
EGLN2	LINC00174	0.328333	1.10044e-11
EGLN2	LBX2-AS1	0.310902	1.43132e-10
EGLN2	AC006001.2	0.313984	9.20287e-11
EGLN2	AC243964.4	0.316205	6.67322e-11
EGLN2	KMT2E-AS1	0.312909	1.07423e-10
EGLN2	LINC00665	0.305083	3.24961e-10
EGLN2	AC073896.4	0.341381	1.44458e-12
MIOX	AC023043.3	0.42132	6.05935e-19
MIOX	CCR5AS	0.365252	2.72938e-14
TAZ	ANKRD10-IT1	0.317412	5.59782e-11
TAZ	FOXD2-AS1	0.333596	4.90756e-12
TAZ	AC074117.1	0.336195	3.27498e-12
TAZ	AL355488.1	0.349475	3.90429e-13
TAZ	AL022322.1	0.335943	3.40646e-12
TAZ	SNHG15	0.337889	2.51078e-12
TAZ	PTOV1-AS2	0.356812	1.15378e-13
TAZ	AL355574.1	0.300815	5.86245e-10
TAZ	LENG8-AS1	0.314613	8.40496e-11
TAZ	AC006042.1	0.369952	1.20025e-14
TAZ	LINC02604	0.320474	3.57127e-11
TAZ	AC018665.1	0.339323	2.00252e-12
TAZ	SNHG11	0.350835	3.12175e-13
TAZ	BBOX1-AS1	0.327999	1.15771e-11
TAZ	LINC00174	0.342225	1.26247e-12
TAZ	LINC00106	0.386593	5.86982e-16
TAZ	AC120053.1	0.311482	1.31765e-10
TAZ	ELF3-AS1	0.311608	1.29425e-10
TAZ	WAC-AS1	0.369613	1.27422e-14
TAZ	AL691482.3	0.332948	5.42512e-12
TAZ	AC009237.14	0.339882	1.83302e-12
TAZ	LINC00265	0.416457	1.6669e-18
TAZ	AL139287.1	0.35369	1.94559e-13
TAZ	ASMTL-AS1	0.415521	2.02118e-18
TAZ	AC136475.3	0.315791	7.08701e-11
TAZ	MCF2L-AS1	0.300328	6.26614e-10
TAZ	AC003070.1	0.313687	9.6062e-11
TAZ	AL117382.1	0.315953	6.92257e-11
TAZ	SLC25A25-AS1	0.301949	5.01602e-10
MTDH	LINC01082	-0.33047	7.94246e-12
MTDH	AC008808.2	-0.31565	7.23407e-11
MTDH	AC099850.3	0.311034	1.40466e-10
MTDH	AC131009.3	0.301586	5.27309e-10
MTDH	THAP9-AS1	0.366413	2.23066e-14
MTDH	SNHG4	0.375439	4.52299e-15
MTDH	SNHG12	0.313722	9.55715e-11
MTDH	SNHG1	0.339178	2.04883e-12
MTDH	TNFRSF10A-AS1	0.412034	4.1245e-18
MTDH	ZNF667-AS1	-0.302102	4.91158e-10
MTDH	UBR5-AS1	0.468795	1.25458e-23
MTDH	HOXA11-AS	0.325792	1.61611e-11
MTDH	OTUD6B-AS1	0.532945	3.05301e-31
MTDH	AC138305.3	0.30996	1.63639e-10
IDH1	AP001107.5	-0.360914	5.75678e-14
IDH1	PGM5-AS1	-0.333592	4.91061e-12
IDH1	LINC02106	-0.387807	4.67786e-16
IDH1	NALT1	-0.354145	1.80356e-13
IDH1	AL357054.4	-0.385436	7.28038e-16
IDH1	AC011472.4	-0.354438	1.71759e-13
IDH1	AC008808.2	-0.379318	2.24301e-15
IDH1	PART1	-0.342721	1.16613e-12
IDH1	AC011472.1	-0.353027	2.17258e-13
IDH1	AC025280.1	-0.31729	5.69852e-11
IDH1	MIR1-1HG-AS1	-0.377849	2.92842e-15
IDH1	AC099850.3	0.345321	7.67616e-13
IDH1	HAND2-AS1	-0.375847	4.20321e-15
IDH1	AC002398.2	-0.392411	1.96086e-16
IDH1	RGS5	-0.315518	7.37337e-11
IDH1	AL031587.5	-0.355629	1.40744e-13
IDH1	AC090152.1	-0.338217	2.38425e-12
IDH1	GIHCG	-0.359581	7.22357e-14
IDH1	AC053503.3	-0.376039	4.06044e-15
IDH1	AF001548.1	-0.389003	3.7368e-16
IDH1	ZNF710-AS1	-0.327243	1.29827e-11
IDH1	MIR100HG	-0.456868	2.21399e-22
IDH1	FENDRR	-0.395978	9.90432e-17
IDH1	LINC00641	-0.310623	1.48921e-10
IDH1	ZNF667-AS1	-0.356982	1.12125e-13
IDH1	AC036108.3	-0.330415	8.0099e-12
IDH1	ZSCAN16-AS1	-0.31813	5.04035e-11
IDH1	AL391335.1	-0.348844	4.32911e-13
IDH1	AP003071.3	-0.436629	2.247e-20
IDH1	SERTAD4-AS1	-0.372859	7.17368e-15
IDH1	AC053503.5	-0.354488	1.70341e-13
IDH1	CNN3-DT	-0.351104	2.98663e-13
IDH1	CARMN	-0.387925	4.57549e-16
IDH1	AP003071.4	-0.421997	5.25587e-19
IDH1	MBNL1-AS1	-0.388197	4.34744e-16
IDH1	AP000892.4	-0.404129	2.01563e-17
IDH1	AP001372.2	0.303421	4.09367e-10
IDH1	AF001548.2	-0.416648	1.60246e-18
IDH1	ACTA2-AS1	-0.419012	9.81391e-19
IDH1	AC008771.1	0.306107	2.81657e-10
IDH1	LINC00294	-0.358929	8.06953e-14
IDH1	AF001548.3	-0.353102	2.14551e-13
SIRT1	AC005034.3	0.325717	1.63439e-11
SIRT1	HCG18	0.30368	3.94931e-10
SIRT1	LINC00641	0.308445	2.02795e-10
SIRT1	PTOV1-AS2	0.311615	1.29285e-10
SIRT1	PSMA3-AS1	0.315285	7.62617e-11
SIRT1	AC073857.1	0.304763	3.39781e-10
SIRT1	AC005261.1	0.31676	6.15576e-11
SIRT1	AL662795.2	0.304174	3.68741e-10
SIRT1	AC005261.5	0.40219	2.9549e-17
FBXW7	AC015849.3	0.436958	2.08935e-20
FBXW7	AL021707.6	0.4185	1.09174e-18
FBXW7	PTOV1-AS2	0.408161	9.02005e-18
FBXW7	PSMA3-AS1	0.44717	2.10511e-21
FBXW7	AL049840.5	0.393307	1.65293e-16
FBXW7	AC018665.1	0.306282	2.74835e-10
FBXW7	HM13-IT1	0.362741	4.20992e-14
FBXW7	AC084018.1	0.35815	9.20716e-14
FBXW7	HLA-DQB1-AS1	0.341256	1.4736e-12
PANX1	AC099850.3	0.316831	6.0925e-11
PANX1	AC005288.1	0.349555	3.8532e-13
DNAJB6	MIR100HG	0.32321	2.37941e-11
DNAJB6	ZNF667-AS1	0.350448	3.32722e-13
BACH1	AC005261.5	0.384575	8.54204e-16
LONP1	MIR22HG	-0.306306	2.7394e-10
LONP1	LINC01082	-0.302665	4.54489e-10
LONP1	AC099850.3	0.34047	1.66965e-12
LONP1	FOXD2-AS1	0.317495	5.53042e-11
LONP1	SNHG16	0.331858	6.41856e-12
LONP1	REPIN1-AS1	0.411397	4.69474e-18
LONP1	VPS9D1-AS1	0.334772	4.08884e-12
LONP1	EMSLR	0.378556	2.57626e-15
LONP1	TYMSOS	0.316968	5.97271e-11
GPX4	CYTOR	0.317831	5.26552e-11
GPX4	ZFAS1	0.341744	1.36328e-12
GPX4	FLJ20021	0.306816	2.55039e-10
AKR1C1	TMEM220-AS1	0.342865	1.13964e-12
AKR1C1	PRDM16-DT	0.384219	9.12438e-16
AKR1C1	AP003037.1	0.330747	7.61309e-12
AKR1C1	LINC00365	0.416631	1.60779e-18
AKR1C1	AL158206.1	0.39059	2.7702e-16
AKR1C2	LINC00941	0.385963	6.60138e-16
AKR1C3	TMEM220-AS1	0.49728	8.23279e-27
AKR1C3	SOX21-AS1	0.341965	1.3161e-12
AKR1C3	PRDM16-DT	0.364559	3.07729e-14
AKR1C3	LINC00365	0.498107	6.58531e-27
AKR1C3	AL158206.1	0.438537	1.47258e-20
AKR1C3	AC023090.1	0.364606	3.05203e-14
AKR1C3	AC009509.1	0.360108	6.60482e-14
AKR1C3	AC106876.1	0.488024	9.61096e-26
AKR1C3	GATA6-AS1	0.345843	7.0556e-13
AKR1C3	LINC01133	0.420891	6.62911e-19
RB1	TRIM52-AS1	-0.304026	3.76413e-10
RB1	SPATA13	0.386885	5.55799e-16
RB1	EBLN3P	0.305872	2.91064e-10
HSPB1	AC103563.7	0.57197	9.81476e-37
HSPB1	C5orf66-AS1	0.699645	4.17502e-61
HSPB1	LINC02560	0.643743	5.32276e-49
HSPB1	LINC02487	0.499104	5.02852e-27
HSPB1	AL512274.1	0.395092	1.17437e-16
HSPB1	MIR205HG	0.676856	7.5739e-56
HSPB1	DSG1-AS1	0.62181	6.51354e-45
HSPB1	AP002761.4	0.598421	6.7639e-41
HSPB1	LINC01269	0.33808	2.43654e-12
HSPB1	AC103563.2	0.489779	6.0651e-26
HSPB1	AC004816.1	0.444288	4.05547e-21
HSF1	MIR22HG	-0.319886	3.89481e-11
HSF1	SNHG15	0.359805	6.95341e-14
HSF1	AL355574.1	0.341947	1.31971e-12
HSF1	VPS9D1-AS1	0.395694	1.046e-16
HSF1	SNHG11	0.314642	8.36947e-11
HSF1	SNHG17	0.301609	5.25694e-10
HSF1	AC009237.14	0.350403	3.35216e-13
HSF1	MRPL20-AS1	0.381707	1.44974e-15
HSF1	AL590666.2	0.327201	1.30647e-11
HSF1	MAFG-DT	0.44012	1.03504e-20
HSF1	NRAV	0.399923	4.60827e-17
HSF1	RNASEH1-AS1	0.336214	3.26529e-12
HSF1	BAIAP2-DT	0.309576	1.72809e-10
HSF1	AC073046.1	0.317133	5.83011e-11
GCLC	AC003965.2	0.327673	1.21632e-11
NFE2L2	AC103563.7	0.558238	1.0182e-34
NFE2L2	C5orf66-AS1	0.541884	1.94745e-32
NFE2L2	SOX21-AS1	0.388338	4.234e-16
NFE2L2	LINC02560	0.533245	2.78785e-31
NFE2L2	LINC02487	0.489698	6.19653e-26
NFE2L2	AL512274.1	0.44405	4.27994e-21
NFE2L2	MIR205HG	0.521746	8.566e-30
NFE2L2	DSG1-AS1	0.472886	4.56509e-24
NFE2L2	AP002761.4	0.434589	3.51917e-20
NFE2L2	LINC01269	0.416238	1.74389e-18
NFE2L2	AC103563.2	0.430027	9.49554e-20
NFE2L2	AC004816.1	0.412417	3.81564e-18
NFE2L2	AC005532.1	0.357225	1.07623e-13
SQSTM1	PSMA3-AS1	-0.344946	8.15523e-13
SQSTM1	AC024060.2	-0.310864	1.43915e-10
SQSTM1	AC005261.1	-0.309537	1.73761e-10
SQSTM1	UBR5-AS1	-0.308007	2.15701e-10
SQSTM1	AC009237.14	0.328967	9.99292e-12
SQSTM1	LINC00857	0.365657	2.54417e-14
SQSTM1	AL606489.1	0.370085	1.1726e-14
NQO1	TMEM220-AS1	0.380128	1.93533e-15
NQO1	LINC00365	0.39826	6.36985e-17
NQO1	MIR100HG	-0.300334	6.26178e-10
NQO1	AL158206.1	0.426201	2.15814e-19
NQO1	CNN3-DT	-0.311877	1.24537e-10
NQO1	AC106876.1	0.409867	6.39847e-18
NQO1	GATA6-AS1	0.302413	4.70562e-10
NQO1	LINC01133	0.377508	3.11527e-15
NQO1	LINC00294	-0.305981	2.86685e-10
NQO1	AL139246.3	0.327093	1.32796e-11
NQO1	MUC12-AS1	0.335313	3.75846e-12
FTH1	AL355488.1	-0.367905	1.71957e-14
FTH1	HCG18	-0.325846	1.60309e-11
FTH1	AC015849.3	-0.361986	4.79196e-14
FTH1	LINC00641	-0.303555	4.01805e-10
FTH1	AC005261.3	-0.316705	6.20594e-11
FTH1	PELATON	0.320971	3.31826e-11
FTH1	AL021707.6	-0.330933	7.39876e-12
FTH1	PTOV1-AS2	-0.328057	1.14759e-11
FTH1	AL390728.5	-0.365059	2.82213e-14
FTH1	PSMA3-AS1	-0.440301	9.94035e-21
FTH1	AC024060.2	-0.373018	6.97273e-15
FTH1	AL591895.1	-0.302222	4.8312e-10
FTH1	AL049840.5	-0.351113	2.98212e-13
FTH1	AC073857.1	-0.323103	2.4179e-11
FTH1	HM13-IT1	-0.305256	3.17228e-10
FTH1	AC005261.1	-0.457958	1.71071e-22
FTH1	AC120053.1	-0.354375	1.73568e-13
FTH1	AC018645.3	-0.305749	2.96126e-10
FTH1	AL662795.2	-0.341096	1.51144e-12
FTH1	AC005261.5	-0.344303	9.04569e-13
FTH1	AC135050.6	-0.310993	1.41293e-10
MUC1	AL158206.1	0.345484	7.47642e-13
MUC1	CNN3-DT	-0.325506	1.6872e-11
MUC1	AC022211.3	0.301487	5.34544e-10
MUC1	AC130456.3	0.505893	7.8135e-28
MUC1	LINC01133	0.333378	5.07566e-12
MUC1	BX470102.1	0.372915	7.10219e-15
MUC1	AC008870.5	0.444423	3.93354e-21
MUC1	AC008771.1	0.395677	1.04953e-16
MUC1	AC007849.1	0.306342	2.72568e-10
MUC1	LINC00294	-0.308225	2.09179e-10
MUC1	AL139246.3	0.46786	1.5774e-23
MUC1	SLC25A25-AS1	0.334716	4.12419e-12
SLC3A2	LINC02106	-0.30957	1.7296e-10
SLC3A2	AL357054.4	-0.309426	1.76519e-10
SLC3A2	AC008808.2	-0.346207	6.65121e-13
SLC3A2	AC099850.3	0.373544	6.34933e-15
SLC3A2	RGS5	-0.309824	1.66837e-10
SLC3A2	AC090152.1	-0.339874	1.83537e-12
SLC3A2	AF001548.1	-0.304369	3.58921e-10
SLC3A2	MIR100HG	-0.342161	1.27536e-12
SLC3A2	FENDRR	-0.375804	4.23536e-15
SLC3A2	SNHG15	0.341566	1.40259e-12
SLC3A2	SNHG1	0.336186	3.27957e-12
SLC3A2	AC092718.3	0.311257	1.36074e-10
SLC3A2	LINC00641	-0.348141	4.8563e-13
SLC3A2	MELTF-AS1	0.337219	2.78959e-12
SLC3A2	AP003071.3	-0.32641	1.47234e-11
SLC3A2	SERTAD4-AS1	-0.305409	3.1052e-10
SLC3A2	AL355574.1	0.394195	1.39491e-16
SLC3A2	CARMN	-0.301309	5.47754e-10
SLC3A2	VPS9D1-AS1	0.387684	4.78657e-16
SLC3A2	AP003071.4	-0.325603	1.66279e-11
SLC3A2	AC068580.1	0.328565	1.06234e-11
SLC3A2	MBNL1-AS1	-0.308672	1.96391e-10
SLC3A2	AP000892.4	-0.306565	2.64164e-10
SLC3A2	AC009237.14	0.348103	4.88607e-13
SLC3A2	MRPL20-AS1	0.359602	7.19761e-14
SLC3A2	MAFG-DT	0.410564	5.55805e-18
SLC3A2	ACTA2-AS1	-0.339608	1.91426e-12
SLC3A2	NRAV	0.380837	1.70018e-15
SLC3A2	RNASEH1-AS1	0.382569	1.23719e-15
SLC3A2	NKILA	0.430971	7.74253e-20
MT1G	TMEM220-AS1	0.362451	4.42492e-14
MT1G	LINC00365	0.301187	5.57007e-10
MT1G	SEMA3B-AS1	0.395733	1.03817e-16
MT1G	AL158206.1	0.428196	1.40853e-19
CISD1	SNHG6	0.320934	3.33647e-11
CISD1	OTUD6B-AS1	0.31283	1.08644e-10
CISD1	AC073046.1	-0.301397	5.41177e-10
FANCD2	AP001107.5	-0.355872	1.35128e-13
FANCD2	MIR22HG	-0.316151	6.72604e-11
FANCD2	PGM5-AS1	-0.310423	1.53235e-10
FANCD2	LINC02106	-0.37177	8.70397e-15
FANCD2	LINC01082	-0.3833	1.08124e-15
FANCD2	NALT1	-0.308563	1.99428e-10
FANCD2	AL357054.4	-0.306229	2.76904e-10
FANCD2	AC011472.4	-0.317188	5.7841e-11
FANCD2	AC008808.2	-0.387072	5.3674e-16
FANCD2	PART1	-0.362547	4.35241e-14
FANCD2	AC011472.1	-0.303329	4.14581e-10
FANCD2	MIR1-1HG-AS1	-0.340634	1.62673e-12
FANCD2	AC099850.3	0.638378	5.7117e-48
FANCD2	HAND2-AS1	-0.323422	2.30535e-11
FANCD2	AC012073.1	0.535349	1.46835e-31
FANCD2	AC002398.2	-0.357133	1.09309e-13
FANCD2	RGS5	-0.326081	1.54728e-11
FANCD2	AC074117.1	0.377218	3.2829e-15
FANCD2	GIHCG	-0.300112	6.45408e-10
FANCD2	THAP9-AS1	0.309831	1.6667e-10
FANCD2	AC053503.3	-0.336518	3.11365e-12
FANCD2	AF001548.1	-0.346349	6.49954e-13
FANCD2	SNHG4	0.412398	3.83062e-18
FANCD2	MIR100HG	-0.393249	1.67147e-16
FANCD2	FENDRR	-0.380279	1.88279e-15
FANCD2	SNHG12	0.306343	2.72492e-10
FANCD2	SNHG1	0.400361	4.23027e-17
FANCD2	AL928654.2	0.346616	6.22451e-13
FANCD2	SNHG16	0.388014	4.49986e-16
FANCD2	ZNF667-AS1	-0.304005	3.77507e-10
FANCD2	AP003071.3	-0.380271	1.88554e-15
FANCD2	SERTAD4-AS1	-0.380854	1.69492e-15
FANCD2	SPATA13	0.32827	1.11102e-11
FANCD2	EBLN3P	0.375743	4.28265e-15
FANCD2	AC053503.5	-0.311279	1.35643e-10
FANCD2	AC073857.1	0.316218	6.66151e-11
FANCD2	SNHG3	0.400324	4.26067e-17
FANCD2	CARMN	-0.324034	2.1041e-11
FANCD2	AP003071.4	-0.363453	3.72426e-14
FANCD2	MBNL1-AS1	-0.331501	6.78107e-12
FANCD2	AP000892.4	-0.354292	1.75993e-13
FANCD2	HOXA11-AS	0.332111	6.17253e-12
FANCD2	ACTA2-AS1	-0.342674	1.17505e-12
FANCD2	OTUD6B-AS1	0.321606	3.02033e-11
HSPA5	AP001107.5	-0.407254	1.08197e-17
HSPA5	PGM5-AS1	-0.368333	1.59522e-14
HSPA5	AP001065.3	-0.32553	1.68116e-11
HSPA5	LINC02106	-0.433642	4.33041e-20
HSPA5	LINC01082	-0.37852	2.59313e-15
HSPA5	NALT1	-0.40561	1.50211e-17
HSPA5	AL357054.4	-0.42269	4.54275e-19
HSPA5	AC011472.4	-0.438217	1.58099e-20
HSPA5	AC008808.2	-0.449124	1.34504e-21
HSPA5	PART1	-0.426858	1.87567e-19
HSPA5	AC011472.1	-0.427352	1.68767e-19
HSPA5	AC025280.1	-0.356868	1.14293e-13
HSPA5	MIR1-1HG-AS1	-0.438318	1.54613e-20
HSPA5	AC099850.3	0.39192	2.1526e-16
HSPA5	HAND2-AS1	-0.408637	8.19898e-18
HSPA5	AC002398.2	-0.417074	1.46735e-18
HSPA5	RGS5	-0.318062	5.09087e-11
HSPA5	AL031587.5	-0.363034	4.00259e-14
HSPA5	TRIM52-AS1	-0.319459	4.14754e-11
HSPA5	GIHCG	-0.306927	2.51094e-10
HSPA5	AC053503.3	-0.403949	2.08855e-17
HSPA5	AF001548.1	-0.428285	1.38186e-19
HSPA5	ZNF710-AS1	-0.443214	5.16968e-21
HSPA5	MIR100HG	-0.470334	8.59095e-24
HSPA5	FENDRR	-0.436548	2.28754e-20
HSPA5	LINC00641	-0.324367	2.0017e-11
HSPA5	ZNF667-AS1	-0.304099	3.72613e-10
HSPA5	AC036108.3	-0.362303	4.53846e-14
HSPA5	AL391335.1	-0.362169	4.64401e-14
HSPA5	AP003071.3	-0.444241	4.09902e-21
HSPA5	SERTAD4-AS1	-0.384788	8.21085e-16
HSPA5	AC053503.5	-0.361334	5.35803e-14
HSPA5	CNN3-DT	-0.37747	3.13633e-15
HSPA5	CARMN	-0.415608	1.98536e-18
HSPA5	AP003071.4	-0.437925	1.68676e-20
HSPA5	AC007996.1	0.302911	4.39275e-10
HSPA5	MBNL1-AS1	-0.409179	7.35168e-18
HSPA5	AP000892.4	-0.424243	3.27202e-19
HSPA5	AL603750.1	-0.370472	1.09519e-14
HSPA5	AF001548.2	-0.371998	8.35963e-15
HSPA5	ACTA2-AS1	-0.449229	1.3128e-21
HSPA5	AFAP1-AS1	0.305792	2.9434e-10
HSPA5	LINC00294	-0.382584	1.23384e-15
HSPA5	AF001548.3	-0.385588	7.0782e-16
HELLS	AP001107.5	-0.351399	2.84478e-13
HELLS	MIR22HG	-0.40782	9.66005e-18
HELLS	PGM5-AS1	-0.309376	1.77781e-10
HELLS	LINC02106	-0.363468	3.7147e-14
HELLS	LINC01082	-0.361348	5.34524e-14
HELLS	NALT1	-0.309476	1.75266e-10
HELLS	AL357054.4	-0.300868	5.82004e-10
HELLS	AC008808.2	-0.364761	2.9715e-14
HELLS	PART1	-0.327265	1.29388e-11
HELLS	MIR1-1HG-AS1	-0.322225	2.75552e-11
HELLS	AC099850.3	0.551149	1.02882e-33
HELLS	HAND2-AS1	-0.321294	3.16325e-11
HELLS	AC012073.1	0.530143	7.11365e-31
HELLS	AC002398.2	-0.328652	1.04826e-11
HELLS	RGS5	-0.303067	4.29909e-10
HELLS	AC131009.3	0.348664	4.45878e-13
HELLS	FOXD2-AS1	0.329785	8.8204e-12
HELLS	AC074117.1	0.351277	2.90231e-13
HELLS	THAP9-AS1	0.38599	6.56835e-16
HELLS	AC053503.3	-0.328285	1.10852e-11
HELLS	AF001548.1	-0.340945	1.54826e-12
HELLS	AL355488.1	0.411782	4.34124e-18
HELLS	AC018904.1	0.356316	1.25425e-13
HELLS	SNHG4	0.44055	9.40279e-21
HELLS	MIR100HG	-0.367708	1.77986e-14
HELLS	FENDRR	-0.392136	2.06631e-16
HELLS	SNHG12	0.396843	8.38118e-17
HELLS	SNHG15	0.313015	1.05793e-10
HELLS	SNHG1	0.484401	2.46432e-25
HELLS	AL928654.2	0.31888	4.51535e-11
HELLS	AC092718.3	0.350985	3.0459e-13
HELLS	AC015849.3	0.378466	2.6186e-15
HELLS	SNHG16	0.396333	9.24878e-17
HELLS	ZNF667-AS1	-0.342656	1.17839e-12
HELLS	AC010542.5	0.34686	5.98291e-13
HELLS	AL021707.6	0.361115	5.56218e-14
HELLS	PTOV1-AS2	0.409661	6.66999e-18
HELLS	AL390728.5	0.383926	9.63192e-16
HELLS	U62317.1	0.355946	1.33448e-13
HELLS	AP003071.3	-0.371638	8.91085e-15
HELLS	AC090181.2	0.322902	2.49131e-11
HELLS	SERTAD4-AS1	-0.368877	1.45005e-14
HELLS	SPATA13	0.451753	7.32681e-22
HELLS	AC053503.5	-0.30321	4.2151e-10
HELLS	AC010326.3	0.317223	5.75473e-11
HELLS	AC073857.1	0.496486	1.01951e-26
HELLS	AC008735.2	0.301245	5.52617e-10
HELLS	SNHG3	0.422818	4.42221e-19
HELLS	CARMN	-0.309493	1.74848e-10
HELLS	AC005261.1	0.388904	3.80735e-16
HELLS	AP003071.4	-0.357591	1.0119e-13
HELLS	AC093297.2	0.314877	8.09058e-11
HELLS	AC145207.5	0.415341	2.0976e-18
HELLS	DLEU2	0.482812	3.7111e-25
HELLS	SNHG17	0.338192	2.39389e-12
HELLS	MBNL1-AS1	-0.320651	3.47914e-11
HELLS	AC009005.1	0.364995	2.85334e-14
HELLS	AL035461.2	0.470297	8.66957e-24
HELLS	AC087588.1	0.311287	1.35489e-10
HELLS	AP000892.4	-0.346816	6.02557e-13
HELLS	ASB16-AS1	0.311527	1.30915e-10
HELLS	AC018645.3	0.335251	3.79461e-12
HELLS	TYMSOS	0.34927	4.03712e-13
HELLS	AC007342.4	0.327446	1.25894e-11
HELLS	AC007342.8	0.367739	1.77023e-14
HELLS	AC026401.3	0.30226	4.80619e-10
HELLS	AC005261.5	0.318819	4.55618e-11
HELLS	ACTA2-AS1	-0.315316	7.59233e-11
HELLS	AL049555.1	0.327082	1.33026e-11
HELLS	AC015922.2	-0.324969	1.82893e-11
SCD	SPATA13	0.304417	3.56511e-10
SCD	EBLN3P	0.310574	1.4998e-10
SCD	REPIN1-AS1	0.343921	9.62002e-13
SCD	MAFG-DT	0.370042	1.18138e-14
SCD	MINCR	0.332872	5.48874e-12
FADS2	MAFG-DT	0.341002	1.53431e-12
FADS2	LINC02575	0.322599	2.60625e-11
SRC	AP001107.5	-0.303829	3.86846e-10
SRC	LINC02106	-0.324821	1.86997e-11
SRC	LINC01082	-0.310639	1.4859e-10
SRC	NALT1	-0.300367	6.23282e-10
SRC	AC011472.4	-0.31151	1.31249e-10
SRC	AC008808.2	-0.322932	2.48038e-11
SRC	PART1	-0.31697	5.97052e-11
SRC	MIR1-1HG-AS1	-0.301363	5.4371e-10
SRC	HAND2-AS1	-0.307793	2.22299e-10
SRC	AC002398.2	-0.313495	9.87517e-11
SRC	AC053503.3	-0.302648	4.5551e-10
SRC	ZNF710-AS1	-0.321205	3.20551e-11
SRC	MIR100HG	-0.371127	9.75501e-15
SRC	FENDRR	-0.305284	3.15998e-10
SRC	NORAD	0.302547	4.61925e-10
SRC	ZSCAN16-AS1	-0.400725	3.9394e-17
SRC	AP003071.3	-0.332609	5.71693e-12
SRC	SNHG11	0.396087	9.69778e-17
SRC	AP003071.4	-0.323126	2.40949e-11
SRC	MBNL1-AS1	-0.308706	1.95455e-10
SRC	ELF3-AS1	0.322243	2.74779e-11
SRC	AP000892.4	-0.303802	3.88322e-10
SRC	AC009237.14	0.362955	4.0578e-14
SRC	LBX2-AS1	0.365958	2.41435e-14
SRC	LINC00857	0.340383	1.69298e-12
SRC	MRPL20-AS1	0.313042	1.05398e-10
SRC	ACTA2-AS1	-0.335645	3.56891e-12
SRC	NRAV	0.319057	4.39952e-11
SRC	AL606489.1	0.439592	1.1646e-20
SRC	AC073046.1	0.313598	9.73014e-11
STAT3	ZFAS1	-0.317117	5.84384e-11
STAT3	SNHG6	-0.314032	9.13939e-11
PML	U62317.1	0.353243	2.09573e-13
PML	HCP5	0.307411	2.34593e-10
PML	OTUD6B-AS1	-0.329898	8.66853e-12
PML	C8orf31	0.307003	2.48434e-10
MTOR	AC099850.3	0.408604	8.25358e-18
MTOR	AC012073.1	0.391124	2.50366e-16
MTOR	TRIM52-AS1	-0.317876	5.23087e-11
MTOR	RAB11B-AS1	-0.320436	3.59139e-11
MTOR	SNHG4	0.319882	3.89686e-11
MTOR	AL928654.2	0.342452	1.21747e-12
MTOR	EBLN3P	0.329016	9.91828e-12
MTOR	AC018665.1	0.399192	5.31459e-17
MTOR	MRPL20-AS1	0.324912	1.84478e-11
MTOR	AC100810.1	-0.323451	2.29557e-11
MTOR	AC005261.5	0.461514	7.3343e-23
MTOR	AC138305.3	-0.312525	1.13501e-10
MTOR	AC073046.1	0.369665	1.26255e-14
MTOR	AC005332.6	0.32332	2.34088e-11
MTOR	FLJ20021	-0.312407	1.15439e-10
MTOR	AC073896.4	-0.33697	2.90065e-12
NFS1	MIR22HG	-0.310898	1.43217e-10
NFS1	LINC01082	-0.333288	5.14742e-12
NFS1	AC008808.2	-0.323035	2.4423e-11
NFS1	AC099850.3	0.444514	3.85309e-21
NFS1	AC012073.1	0.446047	2.7198e-21
NFS1	AL031587.5	-0.31129	1.35424e-10
NFS1	AC131009.3	0.349311	4.01029e-13
NFS1	FOXD2-AS1	0.43575	2.72731e-20
NFS1	AC074117.1	0.534044	2.18673e-31
NFS1	SNHG4	0.313869	9.35741e-11
NFS1	MIR100HG	-0.317498	5.52831e-11
NFS1	FENDRR	-0.310383	1.54105e-10
NFS1	SNHG15	0.358339	8.91727e-14
NFS1	SNHG1	0.361554	5.16035e-14
NFS1	NORAD	0.434618	3.49732e-20
NFS1	AP003071.3	-0.317392	5.61435e-11
NFS1	DLGAP1-AS2	0.316795	6.12463e-11
NFS1	AL355574.1	0.435764	2.71901e-20
NFS1	AC114488.1	0.323803	2.17789e-11
NFS1	LINC02604	0.360028	6.69503e-14
NFS1	SNHG3	0.305415	3.10243e-10
NFS1	VPS9D1-AS1	0.324043	2.10132e-11
NFS1	SNHG11	0.628755	3.58921e-46
NFS1	SNHG17	0.481223	5.57651e-25
NFS1	ELF3-AS1	0.368565	1.53168e-14
NFS1	AL035461.2	0.350029	3.56477e-13
NFS1	AC009237.14	0.392038	2.10512e-16
NFS1	LBX2-AS1	0.416741	1.57195e-18
NFS1	PANK2-AS1	0.41762	1.31053e-18
NFS1	RAB30-DT	0.318084	5.07419e-11
NFS1	MRPL20-AS1	0.477927	1.28916e-24
NFS1	AC124067.4	0.471854	5.89972e-24
NFS1	MCF2L-AS1	0.337715	2.58062e-12
NFS1	AL121832.2	0.386136	6.39202e-16
NFS1	AL024508.1	0.322095	2.80928e-11
NFS1	AF001548.2	-0.32762	1.22615e-11
NFS1	MAFG-DT	0.351542	2.77822e-13
NFS1	NRAV	0.384553	8.5778e-16
NFS1	TMEM44-AS1	0.340991	1.53696e-12
NFS1	FOXP4-AS1	0.304979	3.29707e-10
NFS1	AL117382.1	0.356962	1.12511e-13
NFS1	RNASEH1-AS1	0.331411	6.87464e-12
NFS1	LINC02575	0.399192	5.31381e-17
NFS1	SNHG30	0.322199	2.76603e-11
NFS1	LINC00665	0.41216	4.02087e-18
NFS1	AL354892.2	0.319587	4.07013e-11
NFS1	BAIAP2-DT	0.307306	2.38075e-10
NFS1	DSCR8	0.350821	3.12914e-13
TP63	AC103563.7	0.627769	5.44063e-46
TP63	C5orf66-AS1	0.661003	1.84514e-52
TP63	LINC02560	0.729625	7.80752e-69
TP63	LINC02487	0.607714	1.88086e-42
TP63	AL512274.1	0.53641	1.06085e-31
TP63	MIR205HG	0.814658	7.1972e-98
TP63	DSG1-AS1	0.657839	8.26997e-52
TP63	AP002761.4	0.734329	3.84517e-70
TP63	LINC01269	0.413858	2.84305e-18
TP63	AC103563.2	0.575361	3.01596e-37
TP63	AC004816.1	0.627491	6.11433e-46
TP63	AC005532.1	0.427344	1.69067e-19
CDKN1A	MIR22HG	0.489075	7.29718e-26
CDKN1A	AC115619.1	0.330545	7.85187e-12
CDKN1A	AC012073.1	-0.339499	1.94759e-12
CDKN1A	AC074117.1	-0.306494	2.66825e-10
CDKN1A	AL355488.1	-0.334181	4.48162e-12
CDKN1A	SNHG12	-0.308597	1.98481e-10
CDKN1A	AC015849.3	-0.322765	2.54269e-11
CDKN1A	AL390728.5	-0.325088	1.79652e-11
CDKN1A	PSMA3-AS1	-0.316394	6.49307e-11
CDKN1A	LENG8-AS1	-0.326502	1.4521e-11
CDKN1A	AC073857.1	-0.305266	3.1676e-10
CDKN1A	LINC02404	0.461925	6.64552e-23
CDKN1A	HM13-IT1	-0.353511	2.00458e-13
CDKN1A	UBR5-AS1	-0.30671	2.5884e-10
CDKN1A	HNF1A-AS1	-0.303508	4.04475e-10
CDKN1A	AC127024.5	-0.330227	8.24328e-12
CDKN1A	AC016888.1	0.319257	4.27253e-11
CDKN1A	AC120053.1	-0.31624	6.63938e-11
FH	MIR100HG	-0.321011	3.29868e-11
FH	EMSLR	0.359475	7.35572e-14
FH	TYMSOS	0.307084	2.45613e-10
FH	AF001548.2	-0.305574	3.03431e-10
CISD2	AP001107.5	-0.389493	3.40776e-16
CISD2	PGM5-AS1	-0.349992	3.58663e-13
CISD2	AP001065.3	-0.328079	1.14371e-11
CISD2	LINC02106	-0.358402	8.82204e-14
CISD2	NALT1	-0.378505	2.60043e-15
CISD2	AL357054.4	-0.381139	1.60868e-15
CISD2	AC011472.4	-0.35457	1.68016e-13
CISD2	AC008808.2	-0.331496	6.78628e-12
CISD2	PART1	-0.346308	6.5433e-13
CISD2	AC011472.1	-0.408856	7.84539e-18
CISD2	AC025280.1	-0.324204	2.05125e-11
CISD2	MIR4435-2HG	0.314125	9.01847e-11
CISD2	MIR1-1HG-AS1	-0.425786	2.35802e-19
CISD2	AC099850.3	0.33411	4.53163e-12
CISD2	HAND2-AS1	-0.386942	5.4995e-16
CISD2	AC002398.2	-0.395981	9.89885e-17
CISD2	RGS5	-0.345075	7.98726e-13
CISD2	AL031587.5	-0.385915	6.65973e-16
CISD2	THAP9-AS1	0.318994	4.44037e-11
CISD2	AC053503.3	-0.420861	6.67084e-19
CISD2	AF001548.1	-0.441269	8.00571e-21
CISD2	ZNF710-AS1	-0.406312	1.30594e-17
CISD2	MIR100HG	-0.407222	1.08882e-17
CISD2	FENDRR	-0.486575	1.40218e-25
CISD2	AC092718.3	0.390812	2.65619e-16
CISD2	LINC00641	-0.388182	4.35983e-16
CISD2	ZNF667-AS1	-0.371208	9.61537e-15
CISD2	AC036108.3	-0.367211	1.94126e-14
CISD2	CYTOR	0.309694	1.69945e-10
CISD2	AL391335.1	-0.395463	1.09367e-16
CISD2	U62317.1	0.308076	2.13616e-10
CISD2	AP003071.3	-0.449024	1.37617e-21
CISD2	SERTAD4-AS1	-0.319	4.4368e-11
CISD2	AC053503.5	-0.37264	7.45871e-15
CISD2	LINC00467	0.426075	2.21695e-19
CISD2	CARMN	-0.403301	2.37384e-17
CISD2	AP003071.4	-0.438209	1.58379e-20
CISD2	MBNL1-AS1	-0.413119	3.30675e-18
CISD2	AP000892.4	-0.417261	1.41152e-18
CISD2	TYMSOS	0.399692	4.82098e-17
CISD2	AF001548.2	-0.354856	1.60176e-13
CISD2	ACTA2-AS1	-0.410512	5.61626e-18
CISD2	AL445524.1	0.314756	8.23339e-11
CISD2	LINC00294	-0.339563	1.9278e-12
CISD2	AF001548.3	-0.358931	8.06651e-14
CBS	AL355574.1	0.341323	1.45791e-12
CBS	LBX2-AS1	0.317118	5.84309e-11
CBS	MAFG-DT	0.330494	7.91378e-12
CBS	LINC02575	0.462919	5.2328e-23
CBS	BAIAP2-DT	0.358994	7.98111e-14
CBS	DSCR8	0.451863	7.14199e-22
ISCU	AP001107.5	0.518047	2.50819e-29
ISCU	PGM5-AS1	0.476523	1.8374e-24
ISCU	AP001065.3	0.402915	2.56176e-17
ISCU	LINC02106	0.581352	3.62361e-38
ISCU	LINC01082	0.407842	9.61726e-18
ISCU	NALT1	0.514206	7.54875e-29
ISCU	AL357054.4	0.551028	1.06976e-33
ISCU	AC011472.4	0.528067	1.32491e-30
ISCU	AC008808.2	0.561333	3.64421e-35
ISCU	PART1	0.499531	4.47775e-27
ISCU	AC011472.1	0.468889	1.22597e-23
ISCU	AC025280.1	0.415993	1.83417e-18
ISCU	MIR1-1HG-AS1	0.50954	2.82527e-28
ISCU	AC099850.3	-0.418509	1.08978e-18
ISCU	HAND2-AS1	0.517081	3.31354e-29
ISCU	AC012073.1	-0.31543	7.46762e-11
ISCU	AC002398.2	0.542272	1.72524e-32
ISCU	AL162231.2	0.390295	2.9291e-16
ISCU	RGS5	0.441004	8.49416e-21
ISCU	AL031587.5	0.333807	4.74987e-12
ISCU	TRIM52-AS1	0.471086	7.13414e-24
ISCU	AC090152.1	0.379149	2.31307e-15
ISCU	GIHCG	0.557465	1.31354e-34
ISCU	AC053503.3	0.465613	2.72848e-23
ISCU	AF001548.1	0.474744	2.87179e-24
ISCU	ZNF710-AS1	0.417105	1.45778e-18
ISCU	MIR100HG	0.602943	1.20049e-41
ISCU	FENDRR	0.488749	7.94836e-26
ISCU	LINC00641	0.407347	1.06188e-17
ISCU	ZNF667-AS1	0.500503	3.43756e-27
ISCU	AC036108.3	0.414661	2.41194e-18
ISCU	ZSCAN16-AS1	0.513175	1.01234e-28
ISCU	AL391335.1	0.336296	3.22357e-12
ISCU	AP003071.3	0.52304	5.86473e-30
ISCU	SERTAD4-AS1	0.556874	1.59549e-34
ISCU	AC053503.5	0.451412	7.92949e-22
ISCU	CNN3-DT	0.421306	6.07672e-19
ISCU	CARMN	0.482657	3.86196e-25
ISCU	AP003071.4	0.517555	2.89075e-29
ISCU	AC016888.1	-0.340513	1.6584e-12
ISCU	MBNL1-AS1	0.475185	2.57155e-24
ISCU	AP000892.4	0.504863	1.0394e-27
ISCU	AL603750.1	0.438638	1.43997e-20
ISCU	AC100810.1	0.36041	6.27339e-14
ISCU	AF001548.2	0.427604	1.59916e-19
ISCU	ACTA2-AS1	0.555625	2.40387e-34
ISCU	AL606489.1	-0.372297	7.92726e-15
ISCU	LINC00294	0.364423	3.1504e-14
ISCU	AC073046.1	-0.416363	1.69946e-18
ISCU	AF001548.3	0.478089	1.23741e-24
ACSL3	EBLN3P	0.323302	2.34705e-11
ACSL3	MHENCR	0.323478	2.28643e-11
ACSL3	AP001372.2	0.320464	3.57622e-11
OTUB1	LINC02106	-0.316571	6.32792e-11
OTUB1	NALT1	-0.307565	2.29547e-10
OTUB1	AL357054.4	-0.312121	1.20274e-10
OTUB1	AC011472.4	-0.319882	3.89711e-11
OTUB1	AC008808.2	-0.302675	4.53822e-10
OTUB1	PART1	-0.318167	5.01283e-11
OTUB1	AC011472.1	-0.30866	1.96735e-10
OTUB1	AC025280.1	-0.312089	1.20814e-10
OTUB1	MIR1-1HG-AS1	-0.337614	2.62152e-12
OTUB1	HAND2-AS1	-0.342106	1.28673e-12
OTUB1	AC002398.2	-0.34817	4.83307e-13
OTUB1	RGS5	-0.347561	5.33792e-13
OTUB1	AL031587.5	-0.33214	6.1452e-12
OTUB1	AC053503.3	-0.354047	1.8334e-13
OTUB1	AF001548.1	-0.365511	2.60958e-14
OTUB1	ZNF710-AS1	-0.357176	1.08525e-13
OTUB1	MIR100HG	-0.383044	1.13368e-15
OTUB1	FENDRR	-0.411668	4.44333e-18
OTUB1	SNHG1	0.337867	2.51948e-12
OTUB1	LINC00641	-0.426181	2.16762e-19
OTUB1	AC036108.3	-0.329833	8.75617e-12
OTUB1	AC104695.2	-0.308767	1.93783e-10
OTUB1	MELTF-AS1	0.315201	7.72022e-11
OTUB1	AL391335.1	-0.373832	6.03068e-15
OTUB1	AP003071.3	-0.372287	7.94172e-15
OTUB1	AC053503.5	-0.331792	6.48425e-12
OTUB1	CARMN	-0.36678	2.09285e-14
OTUB1	VPS9D1-AS1	0.35466	1.65502e-13
OTUB1	AP003071.4	-0.386133	6.3954e-16
OTUB1	MBNL1-AS1	-0.365862	2.4553e-14
OTUB1	AP000892.4	-0.360783	5.88707e-14
OTUB1	LBX2-AS1	0.301021	5.69904e-10
OTUB1	AL603750.1	-0.33519	3.83085e-12
OTUB1	MAFG-DT	0.344081	9.37479e-13
OTUB1	ACTA2-AS1	-0.381531	1.4972e-15
OTUB1	NRAV	0.372301	7.92108e-15
OTUB1	RNASEH1-AS1	0.352058	2.55118e-13
OTUB1	AC015912.3	0.307443	2.33521e-10
OTUB1	AF001548.3	-0.350494	3.3023e-13
LINC00336	AC010789.1	0.364023	3.37562e-14
LINC00336	AC009237.14	0.327077	1.33122e-11
LINC00336	LBX2-AS1	0.42454	3.07261e-19
LINC00336	RAB30-DT	0.305969	2.87138e-10
LINC00336	AL355353.1	0.348635	4.47982e-13
LINC00336	AC015912.3	0.335943	3.40628e-12
BRD4	AC099850.3	0.308521	2.00629e-10
BRD4	AC012073.1	0.454996	3.439e-22
BRD4	FOXD2-AS1	0.328333	1.1004e-11
BRD4	AC074117.1	0.404679	1.80718e-17
BRD4	AL355488.1	0.3211	3.25576e-11
BRD4	SNHG4	0.376968	3.43459e-15
BRD4	HCG18	0.314563	8.46626e-11
BRD4	AL928654.2	0.307177	2.42437e-10
BRD4	AC015849.3	0.350908	3.08466e-13
BRD4	SNHG16	0.31576	7.1191e-11
BRD4	AC005261.3	0.317009	5.93688e-11
BRD4	AL021707.6	0.305044	3.26728e-10
BRD4	PTOV1-AS2	0.406673	1.21515e-17
BRD4	AL049840.5	0.359116	7.8174e-14
BRD4	AL355574.1	0.314593	8.42869e-11
BRD4	LENG8-AS1	0.328997	9.94725e-12
BRD4	AC018665.1	0.453594	4.77427e-22
BRD4	HM13-IT1	0.312646	1.11553e-10
BRD4	AC005261.1	0.359899	6.8435e-14
BRD4	AC145207.5	0.328751	1.03263e-11
BRD4	ASB16-AS1	0.322994	2.45756e-11
BRD4	LINC00265	0.321015	3.29685e-11
BRD4	AL139287.1	0.301028	5.69356e-10
BRD4	AC005261.5	0.338333	2.34123e-12
BRD4	AC011447.7	0.344504	8.75804e-13
PRDX6	PRRT3-AS1	0.368963	1.4284e-14
PRDX6	GAS5	0.330956	7.37255e-12
PRDX6	SLC25A25-AS1	-0.318933	4.48067e-11
SESN2	ZSCAN16-AS1	-0.325305	1.73887e-11
SESN2	AC016888.1	0.384608	8.49014e-16
SESN2	AC073046.1	0.304423	3.56217e-10
NF2	AC099850.3	0.393795	1.50569e-16
NF2	SNHG16	0.352111	2.52875e-13
NF2	REPIN1-AS1	0.336167	3.28949e-12
NF2	AC092171.2	0.303471	4.06551e-10
ARNTL	AC084018.1	0.359221	7.67988e-14
JUN	AP001107.5	0.474787	2.84063e-24
JUN	MIR22HG	0.300694	5.96044e-10
JUN	AC011472.1	0.362458	4.41942e-14
JUN	AC025280.1	0.322036	2.83366e-11
JUN	RGS5	0.303284	4.17169e-10
JUN	AC053503.3	0.381943	1.38825e-15
JUN	FENDRR	0.321097	3.25701e-11
CA9	SEMA3B-AS1	0.344003	9.49438e-13
TMBIM4	AC024896.1	0.307868	2.19989e-10
PLIN2	AC115619.1	0.40874	8.03024e-18
PLIN2	HNF4A-AS1	0.420641	6.98614e-19
AIFM2	LINC00857	0.349592	3.82971e-13
AIFM2	MAFG-DT	0.301957	5.01052e-10
LAMP2	EBLN3P	0.329908	8.65618e-12
LAMP2	C2CD4D-AS1	0.308049	2.14452e-10
LAMP2	LINC00511	0.313593	9.7366e-11
ZFP36	AP001107.5	0.499451	4.57676e-27
ZFP36	MIR22HG	0.367117	1.97315e-14
ZFP36	AC011472.1	0.352166	2.50593e-13
ZFP36	AC025280.1	0.417429	1.36329e-18
ZFP36	AC053503.3	0.346311	6.54009e-13
ZFP36	FENDRR	0.323448	2.29663e-11
PROM2	AC103563.7	0.323716	2.20646e-11
PROM2	C5orf66-AS1	0.32252	2.6372e-11
PROM2	LINC02560	0.34203	1.30236e-12
PROM2	AL512274.1	0.400796	3.8852e-17
PROM2	MIR205HG	0.445697	2.94551e-21
PROM2	AC016888.1	0.337008	2.88353e-12
PROM2	AP002761.4	0.487838	1.00874e-25
PROM2	LINC01269	0.322548	2.62627e-11
PROM2	AC103563.2	0.326164	1.52799e-11
PROM2	AC004816.1	0.40555	1.5202e-17
PROM2	AC008771.1	0.313183	1.03276e-10
CHMP5	EBLN3P	0.414255	2.62134e-18
CHMP5	OTUD6B-AS1	0.323644	2.23021e-11
CHMP6	SNHG12	-0.301182	5.57392e-10
CHMP6	AC005034.3	-0.336537	3.10435e-12
CHMP6	PSMA3-AS1	-0.340854	1.57096e-12
CHMP6	AC024060.2	-0.332073	6.20909e-12
CHMP6	AC005261.1	-0.340447	1.67591e-12
[truncated: 1,113 more rows]

## Sheet: Supplementary Table 3
Supplementary Table 3. 17 pathways enriched in the high-FRLSG group through GSEA analysis.
NAME	GS<br> follow link to MSigDB	GS DETAILS	SIZE	ES	NES	NOM p-val	FDR q-val	FWER p-val	RANK AT MAX	LEADING EDGE
KEGG_VASCULAR_SMOOTH_MUSCLE_CONTRACTION	KEGG_VASCULAR_SMOOTH_MUSCLE_CONTRACTION	Details ...	78	0.526327	1.82931	0.0180723	0.555856	0.181	6961	tags=54%, list=23%, signal=70%
KEGG_JAK_STAT_SIGNALING_PATHWAY	KEGG_JAK_STAT_SIGNALING_PATHWAY	Details ...	104	0.510647	1.77226	0.00992064	0.505469	0.282	5699	tags=42%, list=19%, signal=52%
KEGG_NOD_LIKE_RECEPTOR_SIGNALING_PATHWAY	KEGG_NOD_LIKE_RECEPTOR_SIGNALING_PATHWAY	Details ...	46	0.574172	1.76858	0.0143149	0.351571	0.285	7156	tags=63%, list=24%, signal=83%
KEGG_ALDOSTERONE_REGULATED_SODIUM_REABSORPTION	KEGG_ALDOSTERONE_REGULATED_SODIUM_REABSORPTION	Details ...	29	0.559865	1.74721	0.01002	0.321556	0.311	7331	tags=59%, list=25%, signal=78%
KEGG_LONG_TERM_DEPRESSION	KEGG_LONG_TERM_DEPRESSION	Details ...	46	0.48604	1.73958	0.0059761	0.277334	0.327	6875	tags=48%, list=23%, signal=62%
KEGG_COMPLEMENT_AND_COAGULATION_CASCADES	KEGG_COMPLEMENT_AND_COAGULATION_CASCADES	Details ...	50	0.626124	1.70951	0.0149533	0.301065	0.392	10050	tags=84%, list=34%, signal=127%
KEGG_LONG_TERM_POTENTIATION	KEGG_LONG_TERM_POTENTIATION	Details ...	51	0.505027	1.69907	0.0142566	0.280597	0.413	3348	tags=39%, list=11%, signal=44%
KEGG_FOCAL_ADHESION	KEGG_FOCAL_ADHESION	Details ...	148	0.505959	1.68955	0.0430528	0.265452	0.429	5254	tags=43%, list=18%, signal=52%
KEGG_PHOSPHATIDYLINOSITOL_SIGNALING_SYSTEM	KEGG_PHOSPHATIDYLINOSITOL_SIGNALING_SYSTEM	Details ...	55	0.538447	1.67309	0.0281125	0.26796	0.458	7791	tags=58%, list=26%, signal=79%
KEGG_LEUKOCYTE_TRANSENDOTHELIAL_MIGRATION	KEGG_LEUKOCYTE_TRANSENDOTHELIAL_MIGRATION	Details ...	83	0.493682	1.67201	0.0124481	0.242382	0.458	6266	tags=45%, list=21%, signal=56%
KEGG_ARRHYTHMOGENIC_RIGHT_VENTRICULAR_CARDIOMYOPATHY_ARVC	KEGG_ARRHYTHMOGENIC_RIGHT_VENTRICULAR_CARDIOMYOPATHY_ARVC	Details ...	53	0.510199	1.63834	0.0336634	0.28741	0.514	3944	tags=38%, list=13%, signal=43%
KEGG_CALCIUM_SIGNALING_PATHWAY	KEGG_CALCIUM_SIGNALING_PATHWAY	Details ...	126	0.439413	1.63619	0.0280561	0.268652	0.519	7207	tags=50%, list=24%, signal=66%
KEGG_CHEMOKINE_SIGNALING_PATHWAY	KEGG_CHEMOKINE_SIGNALING_PATHWAY	Details ...	141	0.477847	1.6358	0.0359281	0.248789	0.519	7760	tags=52%, list=26%, signal=70%
KEGG_ABC_TRANSPORTERS	KEGG_ABC_TRANSPORTERS	Details ...	32	0.50648	1.62491	0.0263692	0.250671	0.533	4789	tags=34%, list=16%, signal=41%
KEGG_NATURAL_KILLER_CELL_MEDIATED_CYTOTOXICITY	KEGG_NATURAL_KILLER_CELL_MEDIATED_CYTOTOXICITY	Details ...	84	0.494665	1.6064	0.0487329	0.267576	0.564	5909	tags=46%, list=20%, signal=58%
KEGG_FC_EPSILON_RI_SIGNALING_PATHWAY	KEGG_FC_EPSILON_RI_SIGNALING_PATHWAY	Details ...	57	0.479429	1.60162	0.0261044	0.25919	0.573	3189	tags=28%, list=11%, signal=31%
KEGG_HYPERTROPHIC_CARDIOMYOPATHY_HCM	KEGG_HYPERTROPHIC_CARDIOMYOPATHY_HCM	Details ...	58	0.476473	1.5996	0.0325203	0.246812	0.576	5722	tags=45%, list=19%, signal=55%
